# Supplementary material for: The acceptance of hearing disability among adults experiencing hearing difficulties: a cross-sectional study
Source: PubMed Central journal article supplement — BMJ Open. 2014 Jan 8;4(1):e004066. doi: 10.1136/bmjopen-2013-004066 (PMC3902329; doi:10.1136/bmjopen-2013-004066), 2014-01-08
Supplement: bmjopen-2013-004066.draft_revisions.pdf [file bmjopen-2013-004066.draft_revisions.pdf]

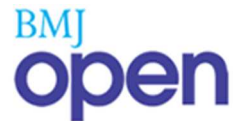

## Acceptance of hearing disability in adults noticing hearing difficulties

|                                 |                                                                                                                                                                                                                                                                                                                                                                                                                                                                                                                                                         |
|---------------------------------|---------------------------------------------------------------------------------------------------------------------------------------------------------------------------------------------------------------------------------------------------------------------------------------------------------------------------------------------------------------------------------------------------------------------------------------------------------------------------------------------------------------------------------------------------------|
| Journal:                        | <i>BMJ Open</i>                                                                                                                                                                                                                                                                                                                                                                                                                                                                                                                                         |
| Manuscript ID:                  | bmjopen-2013-004066                                                                                                                                                                                                                                                                                                                                                                                                                                                                                                                                     |
| Article Type:                   | Research                                                                                                                                                                                                                                                                                                                                                                                                                                                                                                                                                |
| Date Submitted by the Author:   | 19-Sep-2013                                                                                                                                                                                                                                                                                                                                                                                                                                                                                                                                             |
| Complete List of Authors:       | C. Manchaiah, Vinaya K.; Anglia Ruskin University, Department of Vision and Hearing Sciences<br>Molander, Peter; Linköping University, Department of Behavioural Sciences and Learning<br>Ronnberg, Jerker; Linköping University, Linnaeus Centre HEAD, Swedish Institute for Disability Research, Department of Behavioral Science and Learning<br>Andersson, Gerhard; Linköping University,<br>Lunner, Thomas; Linköping University, Department of Behavioural Sciences and Learning, Linnaeus Centre HEAD, Swedish Institute for Disability Research |
| <b>Primary Subject Heading</b>: | Ear, nose and throat/otolaryngology                                                                                                                                                                                                                                                                                                                                                                                                                                                                                                                     |
| Secondary Subject Heading:      | Ear, nose and throat/otolaryngology                                                                                                                                                                                                                                                                                                                                                                                                                                                                                                                     |
| Keywords:                       | Adult otolaryngology < OTOLARYNGOLOGY, Audiology < OTOLARYNGOLOGY, PUBLIC HEALTH                                                                                                                                                                                                                                                                                                                                                                                                                                                                        |
|                                 |                                                                                                                                                                                                                                                                                                                                                                                                                                                                                                                                                         |

SCHOLARONE™  
Manuscripts

only

# Acceptance of hearing disability in adults noticing hearing difficulties

Vinaya K. C. Manchaiah<sup>1,2</sup>, Peter Molander<sup>2</sup>, Jerker Rönnerberg<sup>2</sup>, Gerhard Andersson<sup>2,3</sup>  
& Thomas Lunner<sup>3,4</sup>

1. Department of Vision and Hearing Sciences, Anglia Ruskin University, Cambridge CB1 1PT, United Kingdom
2. Linnaeus Centre HEAD, Swedish Institute for Disability Research, Department of Behavioral Science and Learning, Linköping University, SE-58183, Linköping, Sweden
3. Department of Clinical Neuroscience, Division of Psychiatry, Karolinska Institutet, SE-17177, Stockholm, Sweden
4. Eriksholm Research Centre, Oticon A/S, 20 Rørtangevej, DK-3070 Snekkersten, Denmark

**Corresponding author** Dr. Vinaya K. C. Manchaiah

**Address** Department of Vision and Hearing Sciences,  
Coslett 204, Faculty of Science and Technology,  
Anglia Ruskin University  
Cambridge CB1 1PT  
United Kingdom

**Email** [vinaya.manchaiah@anglia.ac.uk](mailto:vinaya.manchaiah@anglia.ac.uk)

**Tel** +44 (0)1223 698653

**Fax** +44 (0)1223 695056

## Abstract

**Objective:** The aim of this study was to develop a Hearing Disability Acceptance Questionnaire (HDAQ), and to study its construct and concurrent validity. **Design:** Cross-sectional. **Participants:** A total of 90 participants who were noticing hearing difficulties were recruited in the UK. **Main outcome measures:** HDAQ was developed based on the Tinnitus Acceptance Questionnaire (TAQ). Participants' completed self-report measures on hearing disability acceptance, hearing disability, anxiety and depression and a measure of stages of change. **Results:** The results suggest that the HDAQ has a two-factor structure that explains 75.69% of the variance. The scale showed good internal consistency (Cronbach's alpha of 0.86). HDAQ was also found to have good concurrent validity in relation to self-reported hearing disability, self-reported anxiety and depression and readiness to change measures. **Conclusions:** It has been suggested that acceptance is an important aspect when facing chronic health conditions. To our knowledge there is no previously published validated scale to measure the acceptance of hearing disability and for this reason HDAQ could be useful in future research. However, the role of acceptance in adjusting to hearing disability needs to be further investigated.

## Key Words

Hearing disability, hearing loss, acceptance, self-reported measure

## Summary

### Article Focus

- To develop a Hearing Disability Acceptance Questionnaire (HDAQ), and to study its construct and concurrent validity.

### Key Message

- The results suggest that the HDAQ has a two- factor structure that explains 75.69% of the variance. The scale showed good internal consistency (Cronbach's alpha of 0.86).
- Results suggest moderately strong negative but statistically significant correlation between acceptance and hearing disability, moderate negative but statistically significant correlation between acceptance and anxiety and depression, weak negative but statistically significant correlation between acceptance and readiness to change.
- The role of acceptance in adjusting to hearing disability needs to be further investigated.

### Strengths and Weakness

- Online recruitment method the study sample may not be representative of the general population and also the online format of questionnaire administration may have some differences to pen-and-paper format.
- Although there are measures that study coping indirectly, there is no well-established acceptance scale to study the concurrent validity of the HDAQ with the same construct (i.e., acceptance).

## Introduction

In the process of help seeking, an individual with hearing loss may pass through several stages.<sup>1</sup> Edgett<sup>2</sup> highlighted that the process of making a decision to seek help can involve four main stages which included: (1) understanding hearing loss; (2) personal experiences; (3) interaction with society; and (4) taking action. In another study, Englund<sup>3</sup> suggested that patients go through four main stages while making a decision to seek help which include: (1) attracting attention; (2) becoming suspicious; (3) sensing tribulation; and (4) jeopardising the fundamental self. In our previous studies related to ‘patient journey’ of person with hearing impairment (PHI) we took this further and studied the journey from initial onset of problems to successful rehabilitation and developed a patient journey model.<sup>4,5</sup> This model suggests that the PHI goes through seven main stages before, during and after their audiological rehabilitation, which includes: (1) pre-awareness; (2) awareness; (3) movement; (4) diagnostics; (5) rehabilitation; (6) self-evaluation; and (7) resolution. This is a long process as the PHI may on an average take up to 10 years or more to seek help after started to notice hearing difficulties,<sup>6</sup> and further research is necessary to better understand this process.<sup>7</sup> Nevertheless, these studies provide insights regarding stages of adjustment to hearing loss, which may be an indirect (or secondary) indicator of the process of acceptance. In addition, from the above studies it is clear that becoming aware and accepting a hearing disability plays an important role in progressing further in their journey when managing the condition.

There are a few studies in audiology literature which focus on self-assessment of hearing loss,<sup>8</sup> immediate reactions to diagnosis of hearing loss,<sup>9,10</sup> actions taken after failing a screening tests,<sup>11</sup> attitudes to hearing loss and the use of hearing aids,<sup>12,13</sup> and ways in which people with hearing loss cope with their condition.<sup>14-16</sup> These studies provide further insights into initial onset of the condition and how people with hearing disability may manage their

1  
2  
3 condition. A recent literature review suggested that acceptance of hearing loss prior to  
4  
5 hearing aid fitting would positively influence both hearing aid uptake and subsequent hearing  
6  
7 aid use.<sup>17</sup> However, there are still large numbers of people with hearing disability who aware  
8  
9 that they have a problem, but are still not seeking help and/or not taking up intervention  
10  
11 strategies. The previous literature can be confusing as the term ‘acceptance’ was used in  
12  
13 those studies (i.e., acceptance is used synonymously with adherence to  
14  
15 treatment/management options) rather than studying ‘acceptance’ using validated scales  
16  
17 which captures different dimensions of the construct.  
18  
19

20  
21  
22  
23 In psychological terms, ‘acceptance’ can be defined as ‘*a process of actively taking in*  
24  
25 *thoughts, memories, feelings and bodily sensations in a specific situation without having to*  
26  
27 *follow or change them*’.<sup>18</sup> Acceptance may have various dimensions including self- and social  
28  
29 acceptance which may require both emotional and behavioural adaptations. For instance, the  
30  
31 different views of what the term acceptance actually entails can be made visible by looking at  
32  
33 studies of education and academic success, where the term peer acceptance is used in  
34  
35 reference to what degree a pupil is seen as someone who is desirable to interact with.<sup>19</sup> In  
36  
37 disability studies, acceptance has been proposed to be the key component of adjusting to a  
38  
39 disabling condition.<sup>20</sup> Although it is suggested that acceptance of chronic conditions has often  
40  
41 been studied from the perspective of grief and loss, it is also important to study the  
42  
43 acceptance of chronic conditions in relation to perspectives of those living with a chronic  
44  
45 condition with focus on adaptation to and acceptance of change in one’s life.<sup>21</sup>  
46  
47  
48  
49

50  
51  
52 Experiential avoidance is similar to the concept of avoidance coping, and can be seen as the  
53  
54 opposite reaction to acceptance, that is, the person attempts to ignore and minimize the  
55  
56 problems caused by hearing impairment.<sup>22</sup> However, some researchers argue that coping and  
57  
58

1  
2  
3 experiential avoidance are unique but overlapping constructs.<sup>23</sup> For example, in a recent study  
4  
5 on anxiety disorders, although acceptance (i.e., experiential avoidance) loaded on the same  
6  
7 factors as emotional-focused and avoidant coping, acceptance did explain some additional  
8  
9 variance when predicting psychological distress and well-being.<sup>23</sup> Both acceptance and  
10  
11 experiential avoidance in relation to hearing impairment can be interpreted in the light of  
12  
13 stigma theory,<sup>24</sup> which has previously been applied in research on hearing impairment.<sup>25 26</sup>  
14  
15  
16  
17

18  
19 The term ‘acceptance’ in relation to hearing disability has not been well defined and often it  
20  
21 is used and/or referred in relation to help-seeking and intervention adoption (e.g., hearing  
22  
23 aids). In effect, differences exist in terms of psychological and audiological ways of defining  
24  
25 the term ‘acceptance’ in relation to hearing disability. There are however various scales to  
26  
27 study the acceptance of other disabilities and chronic conditions.<sup>20 21 27-30</sup> There are few  
28  
29 studies in audiology that focuses on coping, although they generally measure coping  
30  
31 indirectly using questions related to communication problems.<sup>22</sup> For example, the  
32  
33 Communication Strategies Subscale (CSS) in the questionnaire Communication Profile for  
34  
35 the Hearing Impaired (CPHI).<sup>31</sup> The CPHI-CSS focuses on maladaptive behaviours, verbal  
36  
37 strategies and non-verbal strategies that give insight to poor adjustment to hearing  
38  
39 impairment and poor social support.<sup>32</sup> However, to our knowledge there is no published  
40  
41 validated scale to study the acceptance of hearing disability.  
42  
43  
44  
45  
46

47  
48 The current study was aimed at developing a self-report measure of hearing disability  
49  
50 acceptance and to study its construct and concurrent validity. Our focus on acceptance in this  
51  
52 study was on more on psychological terms (i.e., experiential avoidance which is the opposite  
53  
54 of acceptance).  
55  
56  
57  
58  
59  
60

## Method

### *Study Design and Participants*

The study used cross-sectional data obtained during a clinical trial (i.e., pre-intervention data) of a pre-fitting counseling program.<sup>33 34</sup> Ethical approval was received from Research Ethics Committee, College of Human and Health Sciences, Swansea University. A study advertisement was made in the United Kingdom through various sources including national newspapers, hearing loss charity websites (i.e., Action on Hearing Loss and Hearing Link), and local GP practice notice boards requesting those who are noticing hearing difficulties but not using hearing aids and who had access to internet to participate in this study. Interested participants were encouraged to access the study website using the URL supplied. A total of 90 participants completed the informed consent form, provided demographic information and also completed few questionnaires via internet. The questionnaires used were: Hearing Disability Acceptance Questionnaire (HDAQ), Hearing Handicap Questionnaire (HHQ), Hospital Anxiety and Depression Scale (HADS), University of Rhode Island Change Assessment (URICA) Scale.

### *Development of the Hearing Disability Acceptance Questionnaire (HDAQ)*

The HDAQ was developed based on the Tinnitus Acceptance Questionnaire (TAQ) which was developed in Sweden for studying tinnitus acceptance.<sup>30</sup> The TAQ was influenced by the Acceptance and Action Questionnaire (AAQ) – 32<sup>35</sup> and the Chronic Pain Acceptance Questionnaire - Revised (CAQ-R)<sup>28</sup> and adding few additional questions. The 12-item TAQ has two factors which were named ‘*activity engagement*’ and ‘*tinnitus suppression*,’ and had good internal consistency with Chronbach’s alpha  $\alpha=0.89$ .<sup>30</sup> Resembling TAQ, HDAQ is a measure of experiential avoidance/acceptance. All the 12-items were taken from the TAQ by replacing the word ‘tinnitus’ with ‘hearing problem’. However, the 12-items were further



1  
2  
3 reduced to 7-items (see the results section). Each item is rated on a 7-point Likert scale (1 =  
4 never true, 7 = always true). Total scores range from 7 to 49 with higher scores indicative of  
5 more acceptance of hearing disability (see Appendix 1).  
6  
7  
8

### 9 10 11 ***Other Questionnaires*** 12

13  
14 The HHQ is an instrument which provides a measure of personal and social effects -  
15 emotional distress and discomfort, social withdrawal, and general restriction of  
16 participation.<sup>36</sup> HHQ has 12 questions scored on a 5-point Likert scale (1 = never, 5 = almost  
17 always). Total scores range from 12 to 60 with higher scores indicative of greater disability.  
18  
19 HHQ has a good Cronbach's alpha of .95 for the emotional and .93 for the social scale.  
20  
21  
22  
23  
24

25  
26  
27 The HADS was used for screening for symptoms of anxiety and depression. The HADS  
28 consists of 14 items divided into two subscales (anxiety and depression).<sup>37</sup> Each item is  
29 scored from 0 to 3 (0 = not at all, 3 = most of the time) with a total score of 0 to 42 with  
30 higher scores indicative of more self-reported anxiety and depressive symptoms. In general,  
31 HADS has good reliability and acceptable sensitivity and specificity,<sup>38</sup> which includes  
32 internet administration.<sup>39</sup>  
33  
34  
35  
36  
37  
38  
39  
40  
41  
42

43 URICA is a measure of stages of change consisting of four sub-scales: pre-contemplation,  
44 contemplation, action and maintenance.<sup>40 41</sup> The original URICA scale consists of 32-items,  
45 however, in this study we use a modified version ('the problem' is replaced by 'the hearing  
46 problem') consisting of 24-item scale.<sup>42</sup> Each item is rated on a 5-point Likert scale (1 =  
47 strong disagreement, 5 = strong agreement) and each sub-scale measures specific aspects.  
48  
49 Because most of the study participants were in early stages of help seeking and had not used  
50 intervention for their hearing disability, the eight URICA items relevant to the maintenance  
51  
52  
53  
54  
55  
56  
57  
58  
59  
60

1  
2  
3 were excluded, as they were considered irrelevant. Total scores in each subscale can range  
4  
5 from 8 to 40. The sums of subscales of contemplation and action stages were added and then  
6  
7 by subtracting the precontemplation stage scores (contemplation + action – pre-  
8  
9 contemplation) a readiness to change composite can be obtained. This scale has been used in  
10  
11 a recent study which investigated the usage of the URICA scale in adults with acquired  
12  
13 hearing impairments seeking help for the first time, and showed good construct, concurrent  
14  
15 and predictive validity of the scale.<sup>42</sup>  
16  
17  
18  
19

### 20 21 ***Data Analysis***

22 Statistical analysis was performed using the software IBM - SPSS Version 19 for Windows.  
23  
24 In the first stage descriptive statistics were used to examine demographic factors and the  
25  
26 assumption of normality was tested where appropriate. Principal components analysis (PCA)  
27  
28 was performed to reduce correlated variables to a smaller set of important composite  
29  
30 variables and to study the factor structure,<sup>43</sup> and Cronbach's alpha was calculated to study the  
31  
32 internal consistency of HDAQ.<sup>44</sup> Pearson's correlations were performed to study the  
33  
34 association between factors: hearing disability acceptance, self-reported hearing disability,  
35  
36 self-reported anxiety and depression and readiness to change.  
37  
38  
39  
40  
41  
42

### 43 44 **Results**

45  
46 Table 1 shows the sample characteristics. Average age of participants and average duration of  
47  
48 hearing disability were 63.41 and 11.67 years respectively. There was equal spread of males  
49  
50 and females in the study sample. Also, nearly two-third of participants' had consulted hearing  
51  
52 healthcare professionals previously at least once.  
53  
54

55 **[Insert Table 1 near here]**  
56  
57

### *HDAQ factor structure*

PCA with Varimax rotation was performed to study the factor structure with limit for eigenvalues set at 1.0 and a limit for factor loadings at .40.<sup>43</sup> The scores for items with reverse scoring were reversed before analysis. The initial number of factors of interest was determined using Kaiser's rule of eigenvalues of  $>$ .<sup>45</sup> Subsequently, a scree plot was examined to decide on the number of factors to extract.<sup>46</sup>

In the first instance, the PCA resulted in 3 factor model for the 12-items. However, cross loadings were noted for a few items (i.e. item for which two or more factors loading at .40 eigenvalues or above). PCA was also performed using Direct Oblimin rotation to check if these cross loadings were because of the high correlation between items which also resulted in cross loading of items. The sampling adequacy was assessed with Kaiser-Meyer-Olkin (KMO) statistics, with a value of 0.86. The three factors explained 72.90 % of variance in the 12-items HDAQ. Factor 1 accounted for 49.65% of the variance (with eigenvalue of 3.40), factor 2 for 13.95% of the variance (with eigenvalue of 3.32) and factor 3 for 9.30% of the variance (with eigenvalue of 2.01). Cronbach's alpha was 0.54 for factor 1, 0.50 for factor 2, 0.72 for factor 3 and 0.79 for the overall 12-items. Internal consistency for overall scale was good even though it was not very high for factors 1 and 2.

In the next stage, items which resulted in cross loadings were removed from analysis until no cross loadings were found which resulted in removal of 5-items in the original 12-item scale (removed items are in Appendix 2). Item reduction is one of the key goals of PCA (i.e., reducing the set of variables to smaller number while still accounting for most of the variance). Also, removing the items with complex psychometric properties (i.e., cross

loading) is one of the ways to improve the construct validity of self-report measures.<sup>47</sup> Subsequently, the 7-item HDAQ resulted in a two-factor model with no cross loading and no outliers (See table 2). The sampling adequacy was assessed with KMO statistics, with a value of 0.82. The two factors explained 75.69 % of variance in the HDAQ. The factor 1 accounted for 42.94% of the variance (with an eigenvalue of 3.00) and the factor 2 for 32.75% (with an eigenvalue of 2.29). The factors were named: (1) *activity engagement* – defined as the pursuit of life activities regardless of hearing disability; and (2) *avoidance and suppression* – defined as the attempts to avoid difficult listening situations and attempts to control and suppress thoughts and feeling related to hearing disability. For the factor ‘avoidance and suppression’ a low score indicates more avoidance and suppression, as the items are reversed in the scoring. Cronbach’s alpha was 0.90 for factor 1, 0.82 for factor 2 and 0.86 for the overall HDAQ, showing good internal consistency.<sup>44</sup> The correlation between two factors was  $r(90) = .51, p < 0.001$ , suggesting that while the two subscales were distinguishable they were also related.

**[Insert Table 2 near here]**

Further, we performed PCA in the split sample to study the generalizability (i.e., split sample validation). The sample of 90 was randomly divided into two groups of 45 each. PCA for the first group (sample of 45) with 12-items resulted in three factor model with cross loadings. However, the PCA with 7-items after removal of items with cross loadings resulted in two factor structure which explained 76.41% of variance with no cross loadings. PCA was also performed on the second group (sample of 45) which also resulted in two factor structure which explained 75.93% of variance with no cross loadings. The results from both split samples and the total sample were in close agreement (see Table 3), strongly supporting the two factor model.

1  
2  
3  
4  
5  
6  
7  
8  
9  
10  
11  
12  
13  
14  
15  
16  
17  
18  
19  
20  
21  
22  
23  
24  
25  
26  
27  
28  
29  
30  
31  
32  
33  
34  
35  
36  
37  
38  
39  
40  
41  
42  
43  
44  
45  
46  
47  
48  
49  
50  
51  
52  
53  
54  
55  
56  
57  
58  
59  
60

[Insert Table 3 near here]

### *Correlation among HDAQ and Other Scales*

Table 4 shows the Pearson's correlation coefficients between HDAQ and other scales. The two subscales of HDAQ were moderately associated with each other and strongly associated with the full scale. Results suggest a moderately strong negative but statistically significant correlation between acceptance and hearing disability, moderate negative but statistically significant correlation between acceptance and anxiety and depression, weak negative but statistically significant correlation between acceptance and readiness to change. This may suggest that for those with higher hearing disability acceptance had lower self-reported hearing disability, lower self-reported anxiety and depression, and lower readiness to change. Also, a weak positive but statistically significant correlation was observed between self-reported hearing disability and self-reported anxiety and depression, indicating that those with higher self-reported hearing disability are likely to have higher self-reported anxiety and depression. Although there are some differences, the relationship between individual subscales and other factors (i.e., hearing disability, anxiety and depression and readiness to change) did not differ much when compared to full HDAQ scale.

[Insert Table 4 near here]

## **Discussion**

Research in recent years has pointed to the utility of psychological acceptance in reliving the impact of chronic health conditions.<sup>29 48-50</sup> This paper offers the first attempt, as known by the authors, of extending this concept to hearing disabilities. After the necessary psychometrical modifications were done a two-factor structure emerged, in line with the TAQ<sup>30</sup> and some of the similar self-report measures related to acceptance.<sup>51</sup> Internal consistency is equal to that

1  
2  
3 of the commonest general acceptance scale, the AAQ-I.<sup>52</sup> However, the updated version of  
4  
5 this scale has rejected a two-factor structure in measuring acceptance and instead suggested a  
6  
7 uni-dimensional measure for the AAQ-II.<sup>53</sup> Our study results did not show single factor  
8  
9 structure for HDAQ. The first factor, *activity engagement*, is assumed to entail in what way  
10  
11 the subject maintains a desired level of activates even though facing obstacles. For example, a  
12  
13 low level of activity engagement can be described by a person who stops going with his or  
14  
15 hers friends to visit restaurants as they might fear not being able to follow the conversation in  
16  
17 that context. The other factor, avoidance, can be described as the unwillingness to experience  
18  
19 events because of the related emotional harm that the event causes. This concept can be  
20  
21 thought of as the opposite of acceptance.<sup>54</sup>  
22  
23  
24  
25  
26

27  
28 The items in the current acceptance scale (i.e., HDAQ) were taken from the scale used for  
29  
30 studying acceptance in people with tinnitus, which originally come from general acceptance  
31  
32 questionnaires (i.e., AAQ & CAQ-R). Although there are most likely differences in how  
33  
34 people may cope with 'tinnitus' and 'hearing disability', there are similarities on how people  
35  
36 cope with chronic conditions in general and acceptance is proposed to be key component of  
37  
38 adjustment to a disabling condition.<sup>20</sup> For this reason, studying the construct 'acceptance' in  
39  
40 various chronic conditions including 'hearing disability' with a general framework as defined  
41  
42 and used in psychology would be valuable to both researchers and clinicians.  
43  
44  
45  
46

47  
48 The study results indicate that lower acceptance was associated with increased emotional  
49  
50 distress. This relationship between the HDAQ and HADS is interesting when compared to  
51  
52 similar studies that have pointed to the pivotal role of acceptance in relationship to suffering.  
53  
54 For instance, McCracken<sup>55</sup> found that acceptance was a greater predictor of psychosocial  
55  
56 disability in patients with chronic pain rather than the degree of experienced pain. Numerous  
57  
58  
59  
60

1  
2  
3 other studies have also found that greater acceptance is related to psychological well-being  
4  
5 (for a summary see review paper by Ruiz<sup>56</sup>). In the present study, greater acceptance was  
6  
7 correlated with a more modest rating of one's hearing problems and could thus possibly serve  
8  
9 as an analogue to the above-mentioned finding regarding pain. Also, a recent systematic  
10  
11 review showed that self-reported hearing disability as one of the robust predictor of hearing  
12  
13 help-seeking, hearing aid uptake, hearing aid use and satisfaction with hearing  
14  
15 rehabilitation,<sup>17</sup> which suggest self-reported hearing disability as an important factor in the  
16  
17 process of accepting hearing loss and seeking appropriate intervention. Furthermore,  
18  
19 problems with depression and anxiety were elevated in those who scored higher on the HHQ,  
20  
21 which illustrates the far-reaching consequences a hearing loss might have. The relationship  
22  
23 between HDAQ and readiness to change was both negative and significant, implying that  
24  
25 those who were more accepting of their current status also were less prone to seek a change  
26  
27 of their current situation. The association between HDAQ subscales and other factors did not  
28  
29 differ much. This may be due to the fact that both subscales found to have strong association  
30  
31 with the full scale and moderate association among each other.  
32  
33  
34  
35  
36  
37

38 It is interesting to note that, even though participants were not using hearing aids, two-thirds  
39  
40 of the study sample had consulted hearing healthcare professional at least on one occasion.  
41  
42 The reasons for their consultation are likely to be: (1) having accepted their condition (i.e.,  
43  
44 hearing disability); (2) in a dilemma of whether or not they have the condition and wanted to  
45  
46 confirm this with clinicians; or (3) persuasion from their communication partners. Although  
47  
48 the reasons for not using intervention (e.g., hearing aids) are not clear, it may be related to  
49  
50 their perceived seriousness of their hearing problems. Previous research suggests that there is  
51  
52 no linear relationship between hearing disability and its effects on activities and  
53  
54 participation,<sup>8 57</sup> which may help explain why not all people with hearing disability, may  
55  
56  
57  
58  
59  
60

1  
2  
3 uptake interventions. For this reason, it is important to study the hearing disability acceptance  
4  
5 more in line with psychological terms. Moreover, it is important to note that becoming  
6  
7 suspicious or becoming aware of the hearing disability does not mean that they perceive their  
8  
9 difficulties significant enough to affect their communication and quality of life. This is  
10  
11 something clinicians must be aware of when they are planning and making recommendations  
12  
13 about interventions, especially for patients who are coming to the hearing clinic for the first  
14  
15 time. Also, much work is needed to understand how the 'hearing disability acceptance' may  
16  
17 either facilitate or hinder the journey through this condition.  
18  
19

### 20 21 22 23 ***Limitations of the Study***

24  
25 While the current study focused on an important area where there is dearth of literature, it has  
26  
27 some limitations. Firstly, acceptance in relation to hearing disability has not been well  
28  
29 defined and this scale may only focus on some components of acceptance (i.e., more in line  
30  
31 with psychological acceptance). This may to some degree explain why those with greater  
32  
33 acceptance show less readiness to change. However, this is indeed an important component to  
34  
35 understand as it may explain why many people who are aware of their hearing disability still  
36  
37 refrain from seeking professional help and receive appropriate interventions. Secondly, due to  
38  
39 the online recruitment method the study sample may not be representative of the general  
40  
41 population and caution must be taken with generalising the results.<sup>58 59</sup> Thirdly, the online  
42  
43 format of questionnaire administration may have some differences to pen-and-paper format  
44  
45 even though web-based questionnaires have been found to be reliable and valid.<sup>60 61</sup> Fourthly,  
46  
47 the study results are only related to the sample population who are noticing hearing  
48  
49 difficulties rather than those who are typically seen in clinical situations, even though there  
50  
51 may be some overlap as nearly two-thirds of the current study sample had previously  
52  
53 consulted hearing healthcare professionals. Lastly, although there are measures that study  
54  
55  
56  
57  
58  
59  
60



1  
2  
3 coping indirectly, there is no well-established acceptance scale to study the concurrent  
4  
5 validity of the HDAQ with the same construct (i.e., acceptance). It would have also been  
6  
7 interesting and useful to study the association between ‘acceptance’ and other constructs such  
8  
9 as ‘cognitive functions’ and ‘psychological well-being’. Further, the predictive validity of the  
10  
11 scale needs to be further explored.  
12  
13

## 14 15 16 **Conclusions**

17  
18 In summary, the study results indicate that further exploration of the possible role of  
19  
20 acceptance in the impact and willingness to adjust to hearing problems could be a fruitful  
21  
22 endeavour, particularly in understanding what role the acceptance might play in the patient  
23  
24 journey of PHI. However, much work remains to be done. Primarily, a coherent theoretical  
25  
26 framework is needed that accounts for what, if any, role-acceptance may play in the  
27  
28 adjustment to hearing problems. One cannot simply take for granted that successful  
29  
30 management of other conditions that entails the introduction of painful experiences (e.g.,  
31  
32 tinnitus, chronic pain, anxiety) is relevant to hearing disability that instead is characterized by  
33  
34 the loss of (auditory) experiences. Also, the scientific legwork of examining the longitudinal  
35  
36 stability of the concept, it’s relevancy to objective measures of hearing disability, the utility  
37  
38 of the current structure of the HDAQ as well as if can be successful in alleviating the  
39  
40 suffering that is usually connected to hearing disability remains to be further explored.  
41  
42  
43  
44  
45  
46  
47

## 48 **Acknowledgements**

49  
50 We would like to thank Alexander Alasjö for his help in setting up the online questionnaires  
51  
52 and Ariane Laplante-Lévesque for providing the revised version of URICA scale to be used  
53  
54  
55  
56  
57  
58  
59  
60

1  
2  
3 in this study. This study was a part of doctoral studies of main author and parts of the  
4  
5 manuscripts have been presented in the doctoral thesis.  
6  
7  
8

### 9 10 **Contributors**

11 VM - Contributed to most parts of the work including data collection, analysis and writing;  
12

13 PM - Contributed to writing up; JR - Contributed to study design and writing up; GA -  
14

15 Contributed to study design and writing up; TL - Contributed to study design and writing up.  
16  
17  
18

### 19 20 21 **Funding**

22 This study was partly funded by the grants from Swedish Council for Working Life and  
23

24 Social Research 2009-0055 and Swedish Research Council 2007-8654.  
25  
26  
27  
28  
29

### 30 31 **Ethical Approval**

32 Ethical approval was received from Research Ethics Committee, College of Human and  
33

34 Health Sciences, Swansea University.  
35  
36  
37  
38  
39

### 40 41 **Data Sharing**

42 No additional data are available.  
43  
44  
45  
46

### 47 48 **Conflict of interests**

49 None.  
50  
51  
52  
53  
54

### 55 56 **References**

1. Stephens D, Kramer S.E. *Living with Hearing Difficulties: The Process of Enablement*. Chichester: Wiley, 2009.
2. Edgett LMD. *Help-seeking for advanced rehabilitation by adults with hearing loss: an ecological model*. PhD Thesis. University of British Columbia, Vancouver, Canada, 2002.
3. Engelund G. *Time for hearing – recognising process for the individual*. PhD Thesis. University of Copenhagen, Eriksholm, Denmark, 2006.
4. Manchaiah VKC, Stephens D, Meredith R. The patient journey of adults with hearing impairment: the patients' view. *Clin Otol* 2011;36:227-234.
5. Manchaiah VKC, Stephens D. The Patient journey: Living with hearing impairment. *J Acad Rehab Audiol* 2011;44:29-40.
6. Davis A, Smith P, Ferguson M, *et al*. Acceptability, benefit and costs of early screening for hearing disability: A study of potential screening tests and models. *Health Tech Assess* 2007;11:1-294.
7. Manchaiah VKC, Danermark B, Rönnerberg J, *et al*. Importance of 'process evaluation': Examples from studies on hearing impairment. Submitted
8. Carson AJ. "What brings you here today?" The role of self-assessment in help-seeking for age-related hearing loss. *J Aging Stud* 2005;19:185-200.
9. Martin FN, Krall L, O'Neal J. The diagnosis of acquired hearing loss. *ASHA* 1989;31:47-50.
10. Light KJ, Looi V. Reactions to the diagnosis of a progressive hearing loss in adults. *J Acad Rehab Audiol* 2011;84:53-84.
11. Meyer C, Hickson L, Khan A, *et al*. Investigations of the actions taken by adults who failed a telephone-based hearing screen. *Ear Hear* 2011;32(6):720-731.

12. Brookes DN. The effect of attitude on benefit obtained from hearing aids. *Brit J Audiol* 1989;23:3-11.
13. Jerram JCK, Purdy SC. Technology, expectations, and adjustment to of hearing loss: Predictors of hearing aid outcome. *J Am Acad Audiol* 2001;12:64-79.
14. Hallberg L, Carlsson S. A qualitative study of strategies for managing a hearing impairment. *Brit J Audiol* 1991;25:201-211.
15. Andersson G, Melin L, Lindberg P, *et al.* Development of a short scale for self-assessment of experiences of hearing impairment: The Hearing Coping Assessment. *Scand Audiol* 1995;24:147-154.
16. Andersson G, Melin L, Lindberg P, *et al.* Elderly hearing impaired persons' coping behavior. *Int J Behav Med* 1996;3:303-320.
17. Knudsen LV, Oberg M, Nielsen C, *et al.* Factor influencing help seeking, hearing aid uptake, hearing aid use and satisfaction with hearing aids: A review of the literature. *Trends Amplif* 2010;14(3):127-154.
18. Hayes SC, Strosahl KD, Wilson KG. *Acceptance and commitment therapy an experiential approach to behavior change*. New York: The Guilford Press, 1999.
19. Wentzel KR, Caldwell, K. Friendships, peer acceptance, and group membership: relations to academic achievement in middle school. *Child Dev* 1997;68(6):1198–209.
20. Li L, Moore D. Acceptance of disability and its correlates. *J Soc Psychol* 1998;138:13–25.
21. Stuijbergen A, Becker H, Blozis S, *et al.* Conceptualization and development of the chronic health conditions scale. *Issues Ment Health Nurs* 2008;29(2):101-114.
22. Andersson G, Willebrand M. What is coping? A critical review of the construct and its application in audiology. *Int J Audiol* 2003;42:S97-S103.

- 1  
2  
3 23. Karekla M, Panayiotou G. Coping and experiential avoidance: Unique or overlapping  
4 constructs?. *J Behav Ther Exp Psy* 2011;42:163-170.  
5  
6  
7 24. Goffman E. *Stigma: Notes on management of spoiled identity*. Englewood Cliffs, NJ:  
8 Prentice Hall, 1963.  
9  
10  
11 25. Héту R. The stigma attached to hearing impairment. *Scand Audiol*  
12 1996;25(Suppl.43):12-24.  
13  
14  
15 26. Danermark B, Gellerstedt LC. Hearing Impairment, Psychosocial Work Environment  
16 and Health. *Int J Audiol* 2004;43:383-389.  
17  
18  
19  
20 27. Linkowski DC. A scale to measure acceptance of disability. *Rehab Couns Bull*  
21 1971;14:236-244.  
22  
23  
24 28. McCracken LM, Vowles KE, Eccleston C. Acceptance of chronic pain: component  
25 analysis and revised assessment method. *Pain* 2004;107:159-166.  
26  
27  
28 29. McCracken LM, Vowles KE. Acceptance of chronic pain. *Curr Pain Headache Rep*  
29 2006;10(2):90-94.  
30  
31  
32  
33 30. Westin V, Hayes SC, Andersson G. Is it the sound or your relationship to it? The role  
34 of acceptance in predicting tinnitus impact. *Behav Res Ther* 2008;46:1259-1265.  
35  
36  
37 31. Demorset ME, Erdman SA. Development of the communication profile for the  
38 hearing impaired. *J Speech Lang Hear Res* 1987;52:129-143.  
39  
40  
41  
42 32. Gomez RG, Mandey SF. Coping-with-hearing-loss model for older adults. *Journal*  
43 *of Gerontology: Psychological Sciences* 2001;56B:223-225.  
44  
45  
46 33. Manchaiah VKC, Stephens D, Andersson G, *et al*. Use of the 'patient journey' model  
47 in the internet-based pre-fitting counseling of a person with hearing disability: Study  
48 protocol for a randomized controlled trial. *Trials* 2013;14(1):25.  
49  
50  
51  
52  
53  
54  
55  
56  
57  
58  
59  
60

- 1  
2  
3 34. Manchaiah VKC, Rönnerberg J, Andersson G, *et al.* Use of the ‘patient journey’ model  
4  
5 in the internet-based pre-fitting counseling of a person with hearing disability:  
6  
7 Lessons from a failed clinical trial. Submitted.  
8  
9  
10 35. Hayes SC, Strosahl KD, Wilson KG, *et al.* Measuring experiential avoidance: A  
11  
12 preliminary test of a working model. *Psychol Rec* 2004;54:553-578.  
13  
14 36. Noble W, Tyler R, Dunn C, *et al.* Hearing handicap ratings among different profiles  
15  
16 of adult cochlear implant users. *Ear Hear* 2008;29(1):112–120.  
17  
18 37. Herrmann C. International experience with the hospital anxiety and depression scale -  
19  
20 a review of validation data and clinical results. *J Psychosom Res* 1997;42(1):17–41.  
21  
22 38. Zigmond AS, Snaith RP. The hospital anxiety and depression scale. *Acta Psychiatr*  
23  
24 *Scand* 1983;67(6):361-370.  
25  
26 39. Andersson G, Kaldo-Sandström V, Ström L, *et al.* Internet administration of the  
27  
28 Hospital Anxiety and Depression Scale (HADS) in a sample of tinnitus patients. *J*  
29  
30 *Psychosom Res* 2003;55:259-262.  
31  
32 40. McConaughy EN, Prochaska JO, Velicer WF. Stages of change in psychotherapy:  
33  
34 measurement and sample profiles. *Psychother Theor Res Prac* 1983;20:368–375.  
35  
36 41. DiClemente CC, Prochaska J. Toward a comprehensive, transtheoretical model of  
37  
38 change. Miller & Heather (eds.) *Treating Addictive Behaviors: Second Edition*. New  
39  
40 York: Plenum Press, 1989, pp. 3–24.  
41  
42 42. Laplante-Lévesque A, Hickson L, Worrall L. Stages of change in adults with acquired  
43  
44 hearing impairment seeking help for the first time: application of the transtheoretical  
45  
46 model in audiologic rehabilitation. *Ear Hear* 2013;34(4):447-457.  
47  
48 43. Kline P. *An easy guide to factor analysis*. London: Routledge, 1994.  
49  
50  
51  
52  
53  
54  
55  
56  
57  
58  
59  
60

- 1  
2  
3  
4  
5  
6  
7  
8  
9  
10  
11  
12  
13  
14  
15  
16  
17  
18  
19  
20  
21  
22  
23  
24  
25  
26  
27  
28  
29  
30  
31  
32  
33  
34  
35  
36  
37  
38  
39  
40  
41  
42  
43  
44  
45  
46  
47  
48  
49  
50  
51  
52  
53  
54  
55  
56  
57  
58  
59  
60
44. Garson GD. Reliability analysis statnotes: Topics in multivariate analysis.  
<http://faculty.chass.ncsu.edu/garson/PA765/reliability.htm> (accessed 17 December 2012).
45. Kaiser HF. The applications of electronic computers to factor analysis. *Edu Psychol Meas* 1960;20:141-151.
46. Cattell RB. The scree test for the number of factors. *Multivar Behav Res* 1966;1:245-276.
47. Costello AB, Osborne JW. Best practice in exploratory factor analysis: Four recommendations for getting the most from your analysis. *Practical assessment, Research & Evaluation* 2005;10(7):1-9. Available online:  
<http://pareonline.net/pdf/v10n7.pdf>
48. Westin VZ, Schulin M, Hesser H, *et al.* Acceptance and commitment therapy versus tinnitus retraining therapy in the treatment of tinnitus: a randomised controlled trial. *Behav Res Ther* 2011;49(11):737-747.
49. Hesser H, Gustafsson T, Lundén C, *et al.* A randomized controlled trial of Internet-delivered cognitive behavior therapy and acceptance and commitment therapy in the treatment of tinnitus. *J Consult Clin Psychol* 2012;80(4):649-61.
50. Hayes SC, Villatte M, Levin M, *et al.* Open, aware, and active: contextual approaches as an emerging trend in the behavioral and cognitive therapies. *Annu Rev Clin Psychol* 2011;7:141-68.
51. Bond FW, Bunce D. The role of acceptance and job control in mental health, job satisfaction, and work performance. *J Appl Psychol* 2003;88:1057-1067.
52. Hayes SC, Stroschal K, Wilson KG, *et al.* Measuring experiential avoidance: a preliminary test of a working model. *Psychol Rec* 2004;54:553-578.

- 1  
2  
3 53. Bond FW, Lloyd J, Guenole N. The work-related acceptance and action questionnaire  
4 (WAAQ): Initial psychometric findings and their implications for measuring  
5 psychological flexibility in specific contexts. *J Occup Organ Psychol* 2012;1-25.  
6  
7  
8  
9  
10 54. Hayes SC, Strosahl KD, Wilson KG. *Acceptance and commitment therapy: The*  
11 *process and practice of mindful change (2nd ed.)*. New York: Guilford Press, 2012.  
12  
13  
14 55. McCracken LM. Learning to live with the pain: acceptance of pain predicts  
15 adjustment in persons with chronic pain. *Pain* 1998;74:21-27.  
16  
17  
18 56. Ruiz FJ. A Review of Acceptance and Commitment Therapy (ACT) Empirical  
19 Evidence: Correlational, Experimental Psychopathology, Component and Outcome  
20 Studies. *Int J Psych Psychol Ther* 2010;10(1):125-162.  
21  
22  
23 57. Swan IRC, Gatehouse S. Factors influencing consultation for management of hearing  
24 disability. *Brit J Audiol* 1990;24:155-160.  
25  
26  
27  
28 58. Whitehead LC. Methodological and ethical issues in internet-mediated research in the  
29 field of health: an integrated review of the literature. *Soc Sci Med* 2007;65:782-791.  
30  
31  
32 59. Glasgow RE, Nelson CC, Kearney KA. Reach, engagement, and retention in an  
33 internet-based weight loss program in a multi-site randomized controlled trial. *J Med*  
34 *Internet Res* 2007;9:e11, doi:10.2196/jmir.9.2.e11.  
35  
36  
37  
38 60. Thorén E, Andersson G, Lunner T. The use of research questionnaires in hearing  
39 impaired adults: Online vs paper-and-pencil administration. *BMC Ear Nose Throat*  
40 *Disord* 2012;12(1):1-12.  
41  
42  
43  
44 61. Buchanan T. Online assessment: Desirable or dangerous?. *Prof Psychol-Res Pr*  
45 2002;33:148-154.  
46  
47  
48  
49  
50  
51  
52  
53  
54  
55  
56  
57  
58  
59  
60



## Tables

**Table 1: Demographic characteristics of participants**

|                                                                         |               |
|-------------------------------------------------------------------------|---------------|
| <b>Age (M ± SD in years)</b>                                            | 63.41 ± 10.49 |
| <b>Gender (% male)</b>                                                  | 50            |
| <b>Duration of hearing difficulties (M ± SD in years)</b>               | 11.67 ± 10.83 |
| <b>Consulted healthcare professional about hearing difficulties (%)</b> |               |
| ▪ Yes                                                                   | 65.6          |
| ▪ No                                                                    | 34.4          |
| <b>Education (%)</b>                                                    |               |
| ▪ Compulsory education                                                  | 13.3          |
| ▪ Secondary education                                                   | 48.9          |
| ▪ Tertiary education                                                    | 37.8          |
| <b>Self-reported hearing disability acceptance (HDAQ) (M ± SD)</b>      | 36.88 ± 7.85  |
| ▪ Activity engagement                                                   | 22.72 ± 4.36  |
| ▪ Avoidance and suppression                                             | 14.16 ± 4.65  |
| <b>Self-reported hearing disability (HHQ) (M ± SD)</b>                  | 34.96 ± 9.95  |
| ▪ Emotional                                                             | 20.61 ± 5.75  |
| ▪ Social                                                                | 14.32 ± 4.85  |
| <b>Self-reported anxiety and depression (HADS) (M ± SD)</b>             | 14.77 ± 7.50  |
| ▪ Anxiety                                                               | 7.04 ± 4.43   |
| ▪ Depression                                                            | 7.70 ± 3.81   |
| <b>Stages-of-change (URICA)</b>                                         |               |
| Readiness to Change composite (Scores ± SD)                             | 39.41 ± 8.63  |

Table 2: HDAQ principle components analysis (n=90)

| <b>Scale:</b><br><b>7-item HDAQ</b> | <b>Factor 1:</b><br><b>Activity engagement</b> | <b>Factor 2:</b><br><b>Avoidance and suppression</b> |
|-------------------------------------|------------------------------------------------|------------------------------------------------------|
| <b>Item 1</b>                       | 0.854                                          |                                                      |
| <b>Item 2</b>                       | 0.891                                          |                                                      |
| <b>Item 3</b>                       | 0.857                                          |                                                      |
| <b>Item 4</b>                       | 0.763                                          |                                                      |
| <b>Item 5</b>                       |                                                | 0.885                                                |
| <b>Item 6</b>                       |                                                | 0.862                                                |
| <b>Item 7</b>                       |                                                | 0.734                                                |
| <b>Cronbach's alpha</b>             | 0.90                                           | 0.82                                                 |
| <b>Percentage of variance</b>       | 42.94                                          | 32.75                                                |
| <b>Eigenvalue</b>                   | 3.0                                            | 2.29                                                 |

Table 3: Split sample validation for 7-item HDAQ

|                                      | Full sample<br>(n=90) | Split sample 1<br>(n=45) | Split sample 2<br>(n=45) |
|--------------------------------------|-----------------------|--------------------------|--------------------------|
| <b>Percentage variance explained</b> |                       |                          |                          |
| ▪ Factor 1                           | 42.94                 | 43.48                    | 44.13                    |
| ▪ Factor 2                           | 32.75                 | 32.93                    | 31.80                    |
| ▪ Combined                           | 75.69                 | 76.41                    | 75.93                    |
| <b>Eigenvalue</b>                    |                       |                          |                          |
| ▪ Factor 1                           | 3.0                   | 3.0                      | 3.0                      |
| ▪ Factor 2                           | 2.29                  | 2.3                      | 2.2                      |
| <b>Cronbach's alpha</b>              |                       |                          |                          |
| ▪ Factor 1                           | 0.90                  | 0.83                     | 0.82                     |
| ▪ Factor 2                           | 0.82                  | 0.89                     | 0.90                     |
| ▪ Combined                           | 0.86                  | 0.88                     | 0.86                     |

Table 4: Correlation among different scales (\*: significant correlation with  $\alpha < 0.01$ )

|                                                           | HDAQ   | HDAQ<br>- 1 | HDAQ<br>- 2 | HHQ   | HADS | URICA-R |
|-----------------------------------------------------------|--------|-------------|-------------|-------|------|---------|
| <b>Self-reported hearing disability acceptance (HDAQ)</b> | 1.00   |             |             |       |      |         |
| <b>HDAQ Factor 1: Activity engagement</b>                 | 0.86*  | 1.00        |             |       |      |         |
| <b>HDAQ Factor 2: Avoidance and suppression</b>           | 0.88*  | 0.51*       | 1.00        |       |      |         |
| <b>Self-reported hearing disability (HHQ)</b>             | -0.70* | -0.50*      | -0.71*      | 1.00  |      |         |
| <b>Self-reported anxiety and depression (HADS)</b>        | -0.58* | -0.62*      | -0.39*      | 0.36* | 1.00 |         |
| <b>Readiness to change (URICA-R)</b>                      | -0.27* | -0.19*      | -0.29*      | 0.20  | 0.18 | 1.00    |

## Appendices

### Appendix 1: Hearing Disability Acceptance Questionnaire (HDAQ)

#### *Direction*

Below you will find a number of statements. Please rate the truth of each statement as it applies to you. Use the following rating scale to make your choices:

| 1          | 2                | 3           | 4              | 5          | 6                  | 7           |
|------------|------------------|-------------|----------------|------------|--------------------|-------------|
| Never true | Very rarely true | Seldom true | Sometimes true | Often true | Almost always true | Always true |

For instance, if you believe a statement is “Often true”, you would circle number 5 on the row following the statement.

#### *Items*

1. I am leading a full life, even though I have hearing problem...
2. My life is going well, even though I have hearing problem ....
3. Despite hearing problem, I can draw up and stick to a certain course in my life....
4. When my hearing problem increases I can still take care of my responsibilities...
5. My hearing problem leads me to avoid certain situations...
6. My hearing problem changes me as a person...
7. I spend a lot of time thinking about how things would be for me, without a hearing problem...

**Scoring**

Reverse score items: 5, 6 & 7.

**Appendix 2: Removed items**

- My hearing problem has led me to decrease my engagement in former activities...
- It is necessary for me to control my negative thoughts and feelings concerning my hearing problem....
- I will be in better control of my life if I can control my negative thoughts about my hearing problem....
- I have to struggle to get things done when I have a hearing problem ...
- I strive to suppress aversive thoughts and feelings related to my hearing problem...

STROBE 2007 (v4) Statement—Checklist of items that should be included in reports of *cross-sectional studies*

| Section/Topic                | Item # | Recommendation                                                                                                                                                                       | Reported on page # |
|------------------------------|--------|--------------------------------------------------------------------------------------------------------------------------------------------------------------------------------------|--------------------|
| Title and abstract           | 1      | (a) Indicate the study's design with a commonly used term in the title or the abstract                                                                                               | 1                  |
|                              |        | (b) Provide in the abstract an informative and balanced summary of what was done and what was found                                                                                  | 2 & 3              |
| <b>Introduction</b>          |        |                                                                                                                                                                                      |                    |
| Background/rationale         | 2      | Explain the scientific background and rationale for the investigation being reported                                                                                                 | 4 – 6              |
| Objectives                   | 3      | State specific objectives, including any prespecified hypotheses                                                                                                                     | 6                  |
| <b>Methods</b>               |        |                                                                                                                                                                                      |                    |
| Study design                 | 4      | Present key elements of study design early in the paper                                                                                                                              | 7                  |
| Setting                      | 5      | Describe the setting, locations, and relevant dates, including periods of recruitment, exposure, follow-up, and data collection                                                      | 7                  |
| Participants                 | 6      | (a) Give the eligibility criteria, and the sources and methods of selection of participants                                                                                          | 7                  |
| Variables                    | 7      | Clearly define all outcomes, exposures, predictors, potential confounders, and effect modifiers. Give diagnostic criteria, if applicable                                             | 7 – 9              |
| Data sources/<br>measurement | 8*     | For each variable of interest, give sources of data and details of methods of assessment (measurement). Describe comparability of assessment methods if there is more than one group | 7 - 9              |
| Bias                         | 9      | Describe any efforts to address potential sources of bias                                                                                                                            | 7, 15 & 16         |
| Study size                   | 10     | Explain how the study size was arrived at                                                                                                                                            | 7                  |
| Quantitative variables       | 11     | Explain how quantitative variables were handled in the analyses. If applicable, describe which groupings were chosen and why                                                         | 9                  |
| Statistical methods          | 12     | (a) Describe all statistical methods, including those used to control for confounding                                                                                                | 9                  |
|                              |        | (b) Describe any methods used to examine subgroups and interactions                                                                                                                  | 9                  |
|                              |        | (c) Explain how missing data were addressed                                                                                                                                          | NA                 |
|                              |        | (d) If applicable, describe analytical methods taking account of sampling strategy                                                                                                   | 9                  |
|                              |        | (e) Describe any sensitivity analyses                                                                                                                                                | 9                  |
| <b>Results</b>               |        |                                                                                                                                                                                      |                    |

|                          |     |                                                                                                                                                                                                              |         |
|--------------------------|-----|--------------------------------------------------------------------------------------------------------------------------------------------------------------------------------------------------------------|---------|
| Participants             | 13* | (a) Report numbers of individuals at each stage of study—eg numbers potentially eligible, examined for eligibility, confirmed eligible, included in the study, completing follow-up, and analysed            | 9       |
|                          |     | (b) Give reasons for non-participation at each stage                                                                                                                                                         | NA      |
|                          |     | (c) Consider use of a flow diagram                                                                                                                                                                           | NA      |
| Descriptive data         | 14* | (a) Give characteristics of study participants (eg demographic, clinical, social) and information on exposures and potential confounders                                                                     | 9 & 24  |
|                          |     | (b) Indicate number of participants with missing data for each variable of interest                                                                                                                          | NA      |
| Outcome data             | 15* | Report numbers of outcome events or summary measures                                                                                                                                                         | 9 - 12  |
| Main results             | 16  | (a) Give unadjusted estimates and, if applicable, confounder-adjusted estimates and their precision (eg, 95% confidence interval). Make clear which confounders were adjusted for and why they were included | 9 - 12  |
|                          |     | (b) Report category boundaries when continuous variables were categorized                                                                                                                                    | 9 - 12  |
|                          |     | (c) If relevant, consider translating estimates of relative risk into absolute risk for a meaningful time period                                                                                             | 9 - 12  |
| Other analyses           | 17  | Report other analyses done—eg analyses of subgroups and interactions, and sensitivity analyses                                                                                                               | 9 - 12  |
| <b>Discussion</b>        |     |                                                                                                                                                                                                              |         |
| Key results              | 18  | Summarise key results with reference to study objectives                                                                                                                                                     | 12 - 15 |
| Limitations              | 19  | Discuss limitations of the study, taking into account sources of potential bias or imprecision. Discuss both direction and magnitude of any potential bias                                                   | 15 & 16 |
| Interpretation           | 20  | Give a cautious overall interpretation of results considering objectives, limitations, multiplicity of analyses, results from similar studies, and other relevant evidence                                   | 15 & 16 |
| Generalisability         | 21  | Discuss the generalisability (external validity) of the study results                                                                                                                                        | 15 & 16 |
| <b>Other information</b> |     |                                                                                                                                                                                                              |         |
| Funding                  | 22  | Give the source of funding and the role of the funders for the present study and, if applicable, for the original study on which the present article is based                                                | 17      |

\*Give information separately for cases and controls in case-control studies and, if applicable, for exposed and unexposed groups in cohort and cross-sectional studies.

**Note:** An Explanation and Elaboration article discusses each checklist item and gives methodological background and published examples of transparent reporting. The STROBE checklist is best used in conjunction with this article (freely available on the Web sites of PLoS Medicine at <http://www.plosmedicine.org/>, Annals of Internal Medicine at <http://www.annals.org/>, and Epidemiology at <http://www.epidem.com/>). Information on the STROBE Initiative is available at [www.strobe-statement.org](http://www.strobe-statement.org).





**The acceptance of hearing disability among adults  
experiencing hearing difficulties**

|                                 |                                                                                                                                                                                                                                                                                                                                                                                                                                                                                                                                                         |
|---------------------------------|---------------------------------------------------------------------------------------------------------------------------------------------------------------------------------------------------------------------------------------------------------------------------------------------------------------------------------------------------------------------------------------------------------------------------------------------------------------------------------------------------------------------------------------------------------|
| Journal:                        | <i>BMJ Open</i>                                                                                                                                                                                                                                                                                                                                                                                                                                                                                                                                         |
| Manuscript ID:                  | bmjopen-2013-004066.R1                                                                                                                                                                                                                                                                                                                                                                                                                                                                                                                                  |
| Article Type:                   | Research                                                                                                                                                                                                                                                                                                                                                                                                                                                                                                                                                |
| Date Submitted by the Author:   | 12-Nov-2013                                                                                                                                                                                                                                                                                                                                                                                                                                                                                                                                             |
| Complete List of Authors:       | C. Manchaiah, Vinaya K.; Anglia Ruskin University, Department of Vision and Hearing Sciences<br>Molander, Peter; Linköping University, Department of Behavioural Sciences and Learning<br>Ronnberg, Jerker; Linköping University, Linnaeus Centre HEAD, Swedish Institute for Disability Research, Department of Behavioral Science and Learning<br>Andersson, Gerhard; Linköping University,<br>Lunner, Thomas; Linköping University, Department of Behavioural Sciences and Learning, Linnaeus Centre HEAD, Swedish Institute for Disability Research |
| <b>Primary Subject Heading</b>: | Ear, nose and throat/otolaryngology                                                                                                                                                                                                                                                                                                                                                                                                                                                                                                                     |
| Secondary Subject Heading:      | Ear, nose and throat/otolaryngology                                                                                                                                                                                                                                                                                                                                                                                                                                                                                                                     |
| Keywords:                       | Adult otolaryngology < OTOLARYNGOLOGY, Audiology < OTOLARYNGOLOGY, PUBLIC HEALTH                                                                                                                                                                                                                                                                                                                                                                                                                                                                        |
|                                 |                                                                                                                                                                                                                                                                                                                                                                                                                                                                                                                                                         |

SCHOLARONE™  
Manuscripts

only

# The acceptance of hearing disability among adults experiencing hearing difficulties

Vinaya K. C. Manchaiah<sup>1,2</sup>, Peter Molander<sup>2</sup>, Jerker Rönnerberg<sup>2</sup>, Gerhard Andersson<sup>2,3</sup> and Thomas Lunner<sup>3,4</sup>

1. Department of Vision and Hearing Sciences, Anglia Ruskin University, Cambridge CB1 1PT, United Kingdom
2. Linnaeus Centre HEAD, Swedish Institute for Disability Research, Department of Behavioural Science and Learning, Linköping University, SE-58183, Linköping, Sweden
3. Department of Clinical Neuroscience, Division of Psychiatry, Karolinska Institutet, SE-17177, Stockholm, Sweden
4. Eriksholm Research Centre, Oticon A/S, 20 Rørtangevej, DK-3070 Snekkersten, Denmark

**Corresponding author** Dr. Vinaya K. C. Manchaiah

**Address** Department of Vision and Hearing Sciences,  
Coslett 204, Faculty of Science and Technology,  
Anglia Ruskin University  
Cambridge CB1 1PT  
United Kingdom

**E-mail** [vinaya.manchaiah@anglia.ac.uk](mailto:vinaya.manchaiah@anglia.ac.uk)

**Tel** +44 (0)1223 698653

**Fax** +44 (0)1223 695056

## Abstract

**Objective:** This study developed the Hearing Disability Acceptance Questionnaire (HDAQ) and tested its construct and concurrent validities. **Design:** Cross-sectional. **Participants:** A total of 90 participants who were experiencing hearing difficulties were recruited in the UK. **Outcome Measures:** The HDAQ was developed based on the Tinnitus Acceptance Questionnaire (TAQ). Participants completed self-report measures regarding hearing disability acceptance, hearing disability, symptoms of anxiety and depression, and a measure of stages of change. **Results:** The HDAQ has a two-factor structure that explains 75.69% of its variance. The factors identified were *activity engagement* and *avoidance and suppression*. The scale showed sufficient internal consistency (Cronbach's  $\alpha=0.86$ ). The HDAQ also had acceptable concurrent validity with regard to self-reported hearing disability, self-reported anxiety and depression, and readiness to change measures. **Conclusions:** Acceptance is likely an important aspect of coping with chronic health conditions. To our knowledge, no previously published and validated scale measures the acceptance of hearing disability; therefore, the HDAQ might be useful in future research. However, the role of acceptance in adjusting to hearing disability must be further investigated.

## Keywords

Hearing disability, hearing loss, acceptance, self-reported measure

## Summary

### Article Focus

- To develop the Hearing Disability Acceptance Questionnaire (HDAQ) and study its construct and concurrent validities.

### Key Message

- The results suggest that the HDAQ has a two-factor structure that explains 75.69% of its variance. The scale showed sufficient internal consistency (Cronbach's  $\alpha=0.86$ ).
- The results revealed the following significant correlations: a moderately strong negative correlation between acceptance and hearing disability; a moderately negative correlation between acceptance and symptoms of anxiety and depression; and a weak negative correlation between acceptance and readiness to change.
- The role of acceptance in adjusting to hearing disability must be further investigated.

### Strengths and Weaknesses

- Due to its online recruitment, the sample might not represent the general population. In addition, the online questionnaire might differ from a pen-and-paper format.
- Although there are measures that study coping indirectly, no well-established acceptance scale examines the concurrent validity of the HDAQ using the same construct (i.e., acceptance).

## Introduction

An individual with hearing loss might pass through several stages when help-seeking.<sup>1</sup> Edgett<sup>2</sup> emphasised that the decision-making process to seek help involves four major stages: (1) understanding hearing loss; (2) personal experience; (3) interactions with society; and (4) taking action. In another study, Engelund<sup>3</sup> suggested that patients proceed through four major stages while making a decision to seek help: (1) attracting attention; (2) becoming suspicious; (3) sensing tribulation; and (4) jeopardising the fundamental self. In our previous studies of the “patient’s journey” regarding people with hearing impairment (PHI), we took this idea further and studied this journey from the initial onset of problems through successful rehabilitation, thereby developing a patient journey model.<sup>4-5</sup> This model suggests that PHI experience seven major stages before, during, and after their audiological rehabilitation: (1) pre-awareness; (2) awareness; (3) movement; (4) diagnostics; (5) rehabilitation; (6) self-evaluation; and (7) resolution. On average, PHI can take 10 years or more to seek help after first noticing hearing difficulties; hence, this process might take many years.<sup>6</sup> Although additional research is necessary to better understand this process,<sup>7</sup> these previous studies nevertheless provide insight regarding the stages of adjusting to hearing loss, which might be an indirect (or secondary) indicator of the process of acceptance. In addition, it is clear from the aforementioned studies that becoming aware of and accepting a hearing disability play important roles in further progressing in their journey to manage their condition.

A few studies in the audiology literature have focused on the self-assessment of hearing loss,<sup>8</sup> immediate reactions to the diagnosis of hearing loss,<sup>9-10</sup> actions taken after failing screening tests,<sup>11</sup> attitudes toward hearing loss and the use of hearing aids,<sup>12-13</sup> and the ways in which PHI cope with their condition.<sup>14-16</sup> These studies provide further insights into the initial onset of the condition and how PHI manage their condition. A recent literature review suggested

1  
2  
3 that the acceptance of hearing loss prior to hearing aid fitting positively influences both  
4 hearing aid acquisition and subsequent hearing aid use.<sup>17</sup> However, numerous PHI who are  
5 aware that they have a problem but continue not to seeking help, use intervention strategies,  
6 or both remain. The literature can be confusing because the term “acceptance” is used  
7 synonymously with treatment/management option adherence, rather than studying this term  
8 using validated scales that capture different dimensions of this construct.  
9  
10  
11  
12  
13  
14  
15  
16  
17

18 In psychological terms, acceptance is *a process of actively taking in thoughts, memories,*  
19 *feelings, and bodily sensations in a specific situation without having to follow or change*  
20 *them.*<sup>18</sup> Acceptance can have various dimensions including self- and social acceptance that  
21 require both emotional and behavioural adaptations. For instance, the different views of what  
22 acceptance actually involves is evident from examining studies of education and academic  
23 success, where the term *peer acceptance* refers to a pupil who is judged to be a desirable  
24 interaction partner.<sup>19</sup> Disability studies have proposed that acceptance is the key component  
25 to adjusting to a disabling condition.<sup>20</sup> Although the acceptance of chronic conditions has  
26 often been studied from the perspectives of grief and loss, studying the acceptance of chronic  
27 conditions with regard to the perspectives of those living with it, with a focus on adaptation  
28 to and accepting change in one’s life, is also important.<sup>21</sup>  
29  
30  
31  
32  
33  
34  
35  
36  
37  
38  
39  
40  
41  
42  
43  
44

45 Experiential avoidance is similar to the concept of avoidance coping and can be defined as  
46 the opposite reaction to acceptance; that is, a person attempts to ignore and minimise the  
47 problems caused by hearing impairment.<sup>22</sup> However, some researchers have argued that  
48 coping and experiential avoidance are unique but overlapping constructs.<sup>23</sup> For example,  
49 although acceptance (i.e., experiential avoidance) loaded on to the same factors as emotion-  
50 focused and avoidant coping in a recent study of anxiety disorders, acceptance explained  
51  
52  
53  
54  
55  
56  
57  
58  
59  
60

1  
2  
3 additional variance when predicting psychological distress and well-being.<sup>23</sup> With regard to  
4  
5 hearing impairment, both acceptance and experiential avoidance can be interpreted in light of  
6  
7 stigma theory,<sup>24</sup> which has previously been applied in hearing impairment research.<sup>25-26</sup>  
8  
9

10  
11 Acceptance, in relation to hearing disability, has not been well defined; often this term is used  
12  
13 to refer to help-seeking behaviour and intervention (e.g., hearing aids) adoption. In effect,  
14  
15 differences exist in terms of the psychological and audiological ways of defining acceptance  
16  
17 with regard to hearing disability. However, various scales examine the acceptance of other  
18  
19 disabilities and chronic conditions.<sup>20-21, 27-30</sup> Past audiology studies have focused on coping;  
20  
21 however, coping is generally measured indirectly via questions related to communication  
22  
23 problems<sup>22</sup> [e.g., the Communication Strategies Subscale (CSS) in the Communication  
24  
25 Profile for the Hearing Impaired (CPHI) questionnaire].<sup>31</sup> The CPHI-CSS focuses on  
26  
27 maladaptive behaviours as well as verbal strategies and non-verbal strategies, and it provides  
28  
29 insight concerning poor adjustment to hearing impairment and poor social support.<sup>32</sup> To our  
30  
31 knowledge, however, no published and validated scale examines the acceptance of hearing  
32  
33 disability.  
34  
35  
36  
37  
38  
39

40  
41 The current study developed a self-report measure of hearing disability acceptance and  
42  
43 investigated its construct and concurrent validities. We focused on the psychological aspects  
44  
45 of acceptance in this study (i.e., experiential avoidance, which is the opposite of acceptance).  
46  
47  
48

## 49 **Method**

### 50 *Study Design and Participants*

51  
52  
53 The current study used cross-sectional data obtained during a clinical trial (i.e., pre-  
54  
55 intervention data) of a pre-fitting counselling program.<sup>33-34</sup> Ethical approval was received  
56  
57  
58  
59  
60

1  
2  
3 from the Research Ethics Committee, College of Human and Health Sciences, Swansea  
4 University. A study advertisement was offered in the UK through various sources including  
5 national newspapers, hearing loss charity websites (i.e., Action on Hearing Loss and Hearing  
6 Link), and local GP practice notice boards, inviting those who were experiencing hearing  
7 difficulties but not using hearing aids to those who had access to the Internet to participate in  
8 this study. Interested participants were encouraged to access the study website using the URL  
9 supplied. A total of 90 participants completed the informed consent form, provided  
10 demographic information, and completed four online questionnaires. These questionnaires  
11 included the Hearing Disability Acceptance Questionnaire (HDAQ), the Hearing Handicap  
12 Questionnaire (HHQ), the Hospital Anxiety and Depression Scale (HADS), and the  
13 University of Rhode Island Change Assessment (URICA) Scale.  
14  
15  
16  
17  
18  
19  
20  
21  
22  
23  
24  
25  
26  
27  
28  
29

### 30 ***Development of the HDAQ***

31 The HDAQ was developed based on the Tinnitus Acceptance Questionnaire (TAQ), which  
32 was developed in Sweden to study tinnitus acceptance.<sup>30</sup> The TAQ was based on the  
33 Acceptance and Action Questionnaire (AAQ),<sup>35</sup> and the Chronic Pain Acceptance  
34 Questionnaire-Revised (CPAQ-R);<sup>28</sup> some additional questions were included. The 12-item  
35 TAQ has two factors (*activity engagement* and *tinnitus suppression*), and it has sufficient  
36 internal consistency (Cronbach's  $\alpha=0.89$ ).<sup>30</sup> Like the TAQ, the HDAQ is a measure of  
37 experiential avoidance/acceptance. Its 12 items were taken from the TAQ, and the word  
38 "tinnitus" was replaced with "hearing problem". However, the 12 items were further reduced  
39 to 7 items (see the results section). Each item was rated on a 7-point Likert scale (1=never  
40 true, 7=always true). Total scores ranged from 7 to 49; higher scores indicate greater  
41 acceptance of hearing disability (see Appendix 1).  
42  
43  
44  
45  
46  
47  
48  
49  
50  
51  
52  
53  
54  
55  
56  
57  
58  
59  
60



### ***Other Questionnaires***

The HHQ measures personal and social effects (i.e., emotional distress and discomfort, social withdrawal, and general participation restrictions).<sup>36</sup> The 12 questions of the HHQ are scored on a 5-point Likert scale (1=never, 5=almost always). Total scores range from 12 to 60, and higher scores indicate greater disability. The HHQ has acceptable internal consistency, with Cronbach's  $\alpha$  of 0.95 and 0.93 for the emotional and social scales, respectively.

The HADS was used to screen for symptoms of anxiety and depression. The HADS consists of 14 items, divided into two subscales: anxiety and depression.<sup>37</sup> Each item is scored from 0 to 3 (0=not at all, 3=most of the time) with a total score ranging from 0 to 42; higher scores indicate more self-reported anxiety and depressive symptoms. In general, the HADS has acceptable reliability ( $r=.84$ ), internal consistency ( $\alpha=.83$ ), and sensitivity and specificity (0.80),<sup>38</sup> including Internet administration.<sup>39</sup>

The URICA measures of stages of change across four subscales: pre-contemplation, contemplation, action, and maintenance.<sup>40-41</sup> The original URICA scale consists of 32 items; however, the current study used a modified version (*the problem* was replaced with *the hearing problem*) consisting of a 24-item scale.<sup>42</sup> Each item was rated on a 5-point Likert scale (1=strong disagreement, 5=strong agreement), and each subscale measured specific aspects. Most study participants were in the early help-seeking stages and had not received interventions for their hearing disabilities; therefore, the eight URICA items regarding maintenance were excluded because they were considered irrelevant for the sample. The total scores of each subscale ranged from 8 to 40. The subscale scores concerning the contemplation and action stages were added, from which the pre-contemplation stage scores were subtracted to obtain a readiness-to-change composite score (i.e., contemplation + action

1  
2  
3 – pre-contemplation). A recent study used this modified scale to investigate the use of the  
4  
5 URICA scale among adults with acquired hearing impairments seeking help for the first time.  
6  
7 This scale showed acceptable construct, concurrent, and predictive validities.<sup>42</sup>  
8  
9

### 10 11 *Data Analyses*

12  
13 All data analyses were performed using IBM SPSS Version 19 for Windows. Descriptive  
14  
15 statistics were applied to examine demographic factors, and the assumption of normality (i.e.,  
16  
17 Shapiro-Wilk test values of 0.05) was tested before conducting a principal components  
18  
19 analysis (PCA). A PCA was performed to reduce the correlated variables to a smaller set of  
20  
21 important composite variables and examine the factor structure.<sup>43</sup> Cronbach's  $\alpha$  was  
22  
23 calculated to assess the internal consistency of the HDAQ.<sup>44</sup> Pearson's correlations were  
24  
25 performed to examine the association among the following factors: hearing disability  
26  
27 acceptance, self-reported hearing disability, self-reported anxiety and depression, and  
28  
29 readiness to change.  
30  
31  
32  
33  
34  
35  
36

### 37 **Results**

38  
39 The data were normally distributed. Table 1 displays the sample characteristics. The average  
40  
41 age of participants and the average duration of hearing disability were 63.41 and 11.67 years,  
42  
43 respectively. The number of males and females in the sample was equal. In addition, nearly  
44  
45 two-thirds of participants had consulted healthcare professionals specialised in hearing (e.g.,  
46  
47 audiologists, hearing aid dispensers, or ENT specialists) at least once.  
48  
49

50 **[Insert Table 1 near here]**  
51  
52  
53  
54

### 55 *HDAQ factor structure*

1  
2  
3 A PCA with Varimax rotation was performed to examine the factor structure. Eigenvalues  
4 were set at 1.0, and the limit for factor loadings was set at .40.<sup>43</sup> The relevant items were  
5 reverse scored before analysis. The initial number of factors of interest was determined using  
6 Kaiser's rule of eigenvalues greater than 1.0.<sup>45</sup> Subsequently, a scree plot was examined to  
7 determine the number of factors to extract.<sup>46</sup>  
8  
9  
10  
11  
12

13  
14  
15  
16 In the first instance, the PCA resulted in a three-factor model for the 12 items. However,  
17 cross loadings were noted for some items (i.e., items that loaded at .40 or above on two or  
18 more factors). A PCA was also performed using Direct Oblimin rotation to determine  
19 whether these cross loadings were due to the high correlations among items. The Kaiser-  
20 Meyer-Olkin (KMO) measure of sampling adequacy was 0.86, and Bartlett's Test of  
21 Sphericity was significant [ $\chi^2(66)=370.89, p<.001$ ]. The three factors explained 72.90% of  
22 the variance in the 12-item HDAQ. Factor 1 accounted for 49.65% of the variance (with an  
23 eigenvalue of 3.40); Factor 2 accounted for 13.95% of the variance (with an eigenvalue of  
24 3.32); and Factor 3 accounted for 9.30% of the variance (with an eigenvalue of 2.01). The  
25 Cronbach's  $\alpha$ s were 0.54, 0.50, 0.72, and 0.79 for Factors 1, 2, 3, and the overall 12 items,  
26 respectively. The internal consistency of the overall scale was acceptable, although it was not  
27 high for Factors 1 and 2.  
28  
29  
30  
31  
32  
33  
34  
35  
36  
37  
38  
39  
40  
41  
42  
43  
44

45 In the next stage, all items that resulted in cross loadings were removed from the analysis;  
46 thus, five items were removed from the original 12-item scale (see Appendix 2 for the  
47 removed items). Item reduction (i.e., minimising the set of variables while still accounting for  
48 most of the variance) is one of the key goals of PCA. Moreover, removing the items with  
49 complex psychometric properties (i.e., cross loadings) can improve the construct validity of  
50 self-report measures.<sup>47</sup> Subsequently, the seven-item HDAQ resulted in a two-factor model  
51  
52  
53  
54  
55  
56  
57  
58  
59  
60

1  
2  
3 with no cross loading or outliers (see Table 2). The KMO measure of sampling adequacy was  
4  
5 0.82, and Bartlett's test of sphericity was significant ( $\chi^2[21]=363.93, p<.001$ ). These factors  
6  
7 explained 75.69% of the variance in the HDAQ. Factor 1 accounted for 42.94% of the  
8  
9 variance (with an eigenvalue of 3.00), and Factor 2 accounted for 32.75% (with an  
10  
11 eigenvalue of 2.29). The factors were identified as: (1) *activity engagement* (i.e., the pursuit  
12  
13 of life activities regardless of hearing disability) and (2) *avoidance and suppression* (i.e.,  
14  
15 attempts to avoid difficult listening situations as well as those to control and suppress the  
16  
17 thoughts and feeling related to hearing disability). A low *avoidance and suppression* score  
18  
19 indicates more avoidance and suppression because the items are reverse scored. Cronbach's  
20  
21 *as* were 0.90, 0.82, and 0.86 for Factors 1, 2, and the overall HDAQ, showing acceptable  
22  
23 internal consistency.<sup>44</sup> The correlation between the factors was  $r(90)=0.51, p<0.001$ , which  
24  
25 suggests that the two subscales were distinguishable but related.  
26  
27  
28

29  
30 **[Insert Table 2 near here]**  
31  
32  
33

34 Furthermore, we performed a PCA on the split sample to test for generalisability (i.e., split-  
35  
36 sample validation). The sample of 90 was randomly divided into two groups of 45. The PCA  
37  
38 for the first split sample of 45 on 12 items resulted in a three-factor model with cross  
39  
40 loadings. However, the PCA with 7 items (after the removal of the items with cross loadings)  
41  
42 resulted in a two-factor structure that explained 76.41% of the variance without cross  
43  
44 loadings. A PCA was also performed on the second split sample of 45 that also resulted in a  
45  
46 two-factor structure that explained 75.93% of the variance without cross loadings. The results  
47  
48 from both the split samples and the total sample were in close agreement (see Table 3),  
49  
50 strongly supporting the two-factor model.  
51  
52  
53

54 **[Insert Table 3 near here]**  
55  
56  
57  
58  
59  
60

### *Correlations Between the HDAQ and Other Scales*

Table 4 shows the Pearson's correlation coefficients between the HDAQ and other scales.

The two HDAQ subscales were moderately associated with each other and strongly associated with the full scale. The results revealed the following significant correlations: a moderately strong negative correlation between acceptance and hearing disability; a moderately negative correlation between acceptance and symptoms of anxiety and depression; and a weak negative correlation between acceptance and readiness to change. These results suggest that those people higher hearing disability acceptance had less self-reported hearing disability, fewer self-reported symptoms of anxiety and depression, and lower readiness to change. In addition, a weak positive correlation was found between self-reported hearing disability and self-reported symptoms of anxiety and depression, which indicates that people with higher self-reported hearing disability are likely to have higher self-reported symptoms of anxiety and depression. Although differences were observed, the relationships between the individual subscales and other factors (i.e., hearing disability, symptoms of anxiety and depression, and readiness to change) did not differ much compared with the full HDAQ scale.

**[Insert Table 4 near here]**

### **Discussion**

Recent research has indicated the utility of psychological acceptance with regard to reducing the impact of chronic health conditions.<sup>29, 48-50</sup> The current paper is the first known attempt to extend this concept to hearing disabilities. After the necessary psychometrical modifications, a two-factor structure emerged for the HDAQ that was in line with the TAQ<sup>30</sup> and similar self-report measures related to acceptance.<sup>51</sup> Its internal consistency was equal to that of the most commonly used general acceptance scale, the AAQ-I.<sup>52</sup> However, research on an

1  
2  
3 updated version of this scale rejected a two-factor structure with regard to measuring  
4  
5 acceptance; rather, it suggested a unidimensional structure for the AAQ-II.<sup>53</sup> Our study did  
6  
7 not reveal a single-factor structure for the HDAQ. The first factor, *activity engagement*, was  
8  
9 assumed to reflect whether participants maintain a desired level of activity despite facing  
10  
11 obstacles. For example, a low level of activity engagement might be observed in a person  
12  
13 who stops dining with his or her friends at restaurants because they fear they might not be  
14  
15 able to follow the conversation. The other factor, *avoidance and suppression*, is the  
16  
17 unwillingness to experience events due to their related emotional distress. This concept is the  
18  
19 opposite of acceptance.<sup>54</sup>  
20  
21  
22  
23  
24

25 The HDAQ items were taken from the scale used to study acceptance in people with tinnitus,  
26  
27 which, in turn, was based on the AAQ and CPAQ-R. Although differences most likely exist  
28  
29 with regard to how people cope with tinnitus and hearing disability, similarities are found in  
30  
31 terms of how people cope with general chronic conditions. Acceptance is likely a key  
32  
33 component of adjusting to a disabling condition.<sup>20</sup> Thus, the study of acceptance in various  
34  
35 chronic conditions including hearing disability using the general framework applied in  
36  
37 ‘contextual psychology’ is valuable to both researchers and clinicians.  
38  
39  
40  
41  
42

43 The study results indicate that less acceptance was associated with increased emotional  
44  
45 distress. The relationship between the HDAQ and the HADS is interesting when compared  
46  
47 with similar studies that have indicated the pivotal role of acceptance with regard to  
48  
49 suffering. For instance, McCracken<sup>55</sup> found that acceptance was a stronger predictor of  
50  
51 psychosocial disability among patients with chronic pain than the degree of pain they  
52  
53 experienced. Numerous other studies have also found that greater acceptance is related to  
54  
55 psychological well-being (for a summary, see the review by Ruiz<sup>56</sup>). In the present study,  
56  
57  
58  
59  
60

1  
2  
3 greater acceptance was correlated with a more modest rating of hearing problems; therefore,  
4  
5 it might be analogous to the aforementioned findings regarding pain. Moreover, a recent  
6  
7 systematic review showed that self-reported hearing disability is a robust predictor of hearing  
8  
9 help-seeking, hearing aid acquisition, hearing aid use, and satisfaction with hearing  
10  
11 rehabilitation,<sup>17</sup> which suggests that self-reported hearing disability is an important factor in  
12  
13 the processes of accepting hearing loss and seeking appropriate interventions. Furthermore,  
14  
15 symptoms of depression and anxiety were elevated among those who scored higher on the  
16  
17 HHQ, which illustrates the far-reaching consequences that hearing loss might have. The  
18  
19 relationship between the HDAQ and readiness to change was negative and significant, which  
20  
21 implies that those who were more accepting of their current status were less prone to seek a  
22  
23 change in their current situation. The association between the HDAQ subscales and other  
24  
25 factors did not differ much. This finding might be because both subscales were found to have  
26  
27 strong associations with the full scale and moderate associations with each other.  
28  
29  
30  
31  
32  
33

34 Interestingly, although participants did not use hearing aids, two-thirds of the sample had  
35  
36 consulted healthcare specialists on at least one occasion. The reasons for these consultations  
37  
38 are likely to include: (1) acceptance of their condition (i.e., hearing disability); (2) a dilemma  
39  
40 regarding whether they had the condition and a desire to confirm this supposition with  
41  
42 clinicians; or (3) urging from their social partners. Although the reasons for not accepting  
43  
44 intervention (e.g., hearing aids) are not clear, they might be related to the perceived  
45  
46 seriousness of their hearing problems. Previous research suggests that a linear relationship  
47  
48 does not exist between hearing disability and its effects on activities and participation,<sup>8 57</sup>  
49  
50 which might help explain why not all people with hearing disabilities seek interventions.  
51  
52 Thus, studying hearing disability acceptance in psychological terms is important.  
53  
54  
55

56 Importantly, becoming suspicious or aware of a hearing disability does not mean that PHI  
57  
58  
59  
60

1  
2  
3 perceive their difficulties as significant enough to affect their communication and quality of  
4  
5 life. This gap between awareness and action is something that clinicians must be aware of  
6  
7 when they plan and recommend interventions, especially for patients coming to the hearing  
8  
9 clinic for the first time. In addition, much work is needed to understand how hearing  
10  
11 disability acceptance either facilitates or hinders the journey through this condition.  
12  
13

### 14 15 16 ***Study Limitations*** 17

18 Although the current study focused on an important area of limited research, it nevertheless  
19  
20 has certain limitations. Acceptance with regard to hearing disability is not well defined, and  
21  
22 this scale might only focus on certain components of acceptance (i.e., psychological  
23  
24 acceptance). This limitation might partially explain why people with greater acceptance show  
25  
26 less readiness to change. However, this component is important to understand because it  
27  
28 might explain why many people who are aware of their hearing disability continue to refrain  
29  
30 from seeking professional help and appropriate interventions. Due to the online recruitment  
31  
32 method, the sample might not represent the general population, and caution must be used in  
33  
34 generalising the results.<sup>58-59</sup> Moreover, the relatively small sample size was surprising, given  
35  
36 that the advertisement was published in a national newspaper. The smaller sample size might  
37  
38 also be a limitation of this study. Validating this scale with a larger population is necessary,  
39  
40 although the split-sample validation strongly supported the two-factor model. The online  
41  
42 format of the questionnaire might differ from a pen-and-paper format, although web-based  
43  
44 questionnaires have been found to be reliable and valid.<sup>60-61</sup> The study results are only  
45  
46 relevant with regard to participants who experience hearing difficulties rather than typical  
47  
48 participants in clinical situations, although there might be some overlap because nearly two-  
49  
50 thirds of the current sample had previously consulted hearing specialists. Although indirect  
51  
52 coping measures exist, no well-established acceptance scale examines the concurrent validity  
53  
54  
55  
56  
57  
58  
59  
60



1  
2  
3 of the HDAQ using acceptance. Studying the associations between *acceptance* and other  
4 factors such as *cognitive functions*, *personality*, *quality of life*, and *psychological well-being*  
5  
6 would have been interesting and useful; however, these factors were not included in the  
7  
8 current study. Furthermore, the predictive validity of the scale must be explored.  
9  
10

## 11 12 13 **Conclusions**

14  
15 In summary, our results suggest that additional exploration of the potential role that  
16 acceptance plays in the process of adjusting to hearing problems would be a fruitful  
17 endeavour, particularly with regard to understanding the role that acceptance plays in the  
18 journey of PHI. However, much work remains to be done. Specifically, a coherent theoretical  
19 framework is needed to account for what role, if any, acceptance plays with regard to  
20 adjusting to hearing problems. One cannot take for granted the fact that the successful  
21 management of other conditions, which all entails painful experiences (e.g., tinnitus, chronic  
22 pain, and anxiety), are relevant to hearing disability, which instead is characterised by the  
23 loss of (auditory) experiences. In addition, future research must examine the longitudinal  
24 stability of acceptance and its relevance to objective measures of hearing disability as well as  
25 the utility of the current structure of the HDAQ and whether it can successfully alleviate the  
26 suffering usually associated with hearing disability.  
27  
28  
29  
30  
31  
32  
33  
34  
35  
36  
37  
38  
39  
40  
41  
42  
43  
44

## 45 46 **Acknowledgements**

47  
48 We thank Alexander Alasjö for his help with applying the online questionnaires and Ariane  
49 Laplante-Lévesque for providing us with the revised version of the URICA scale used in this  
50 study. This study was a part of the doctoral study of the first author, and portions of this  
51 manuscript were presented as a doctoral thesis.  
52  
53  
54  
55  
56  
57  
58  
59  
60

## Contributors

VM contributed to most of the work including data collection, analysis, and writing; PM contributed to the writing; JR contributed to study design and writing; GA contributed to study design and writing; and TL contributed to study design and writing.

## Funding

Grants from the Swedish Council for Working Life and Social Research 2009-0055 as well as the Swedish Research Council 2007-8654 partially funded this research.

## Ethical Approval

Ethical approval was received from the Research Ethics Committee, College of Human and Health Sciences, Swansea University.

## Data Sharing

No additional data are available.

## Conflict of interests

None.

## References

1. Stephens D, Kramer S.E. *Living with Hearing Difficulties: The Process of Enablement*. Chichester: Wiley, 2009.
2. Edgett LMD. *Help-seeking for advanced rehabilitation by adults with hearing loss: an ecological model*. PhD Thesis. University of British Columbia, Vancouver, Canada, 2002.
3. Engelund G. *Time for hearing – recognising process for the individual*. PhD Thesis. University of Copenhagen, Eriksholm, Denmark, 2006.
4. Manchaiah VKC, Stephens D, Meredith R. The patient journey of adults with hearing impairment: the patients' view. *Clin Otol* 2011;36:227-234.
5. Manchaiah VKC, Stephens D. The Patient journey: Living with hearing impairment. *J Acad Rehab Audiol* 2011;44:29-40.
6. Davis A, Smith P, Ferguson M, *et al*. Acceptability, benefit and costs of early screening for hearing disability: A study of potential screening tests and models. *Health Tech Assess* 2007;11:1-294.
7. Manchaiah VKC, Danermark B, Rönnerberg J, *et al*. Importance of 'process evaluation': Examples from studies on hearing impairment. Submitted
8. Carson AJ. "What brings you here today?" The role of self-assessment in help-seeking for age-related hearing loss. *J Aging Stud* 2005;19:185-200.
9. Martin FN, Krall L, O'Neal J. The diagnosis of acquired hearing loss. *ASHA* 1989;31:47-50.
10. Light KJ, Looi V. Reactions to the diagnosis of a progressive hearing loss in adults. *J Acad Rehab Audiol* 2011;84:53-84.
11. Meyer C, Hickson L, Khan A, *et al*. Investigations of the actions taken by adults who failed a telephone-based hearing screen. *Ear Hear* 2011;32(6):720-731.

12. Brookes DN. The effect of attitude on benefit obtained from hearing aids. *Brit J Audiol* 1989;23:3-11.
13. Jerram JCK, Purdy SC. Technology, expectations, and adjustment to of hearing loss: Predictors of hearing aid outcome. *J Am Acad Audiol* 2001;12:64-79.
14. Hallberg L, Carlsson S. A qualitative study of strategies for managing a hearing impairment. *Brit J Audiol* 1991;25:201-211.
15. Andersson G, Melin L, Lindberg P, *et al.* Development of a short scale for self-assessment of experiences of hearing impairment: The Hearing Coping Assessment. *Scand Audiol* 1995;24:147-154.
16. Andersson G, Melin L, Lindberg P, *et al.* Elderly hearing impaired persons' coping behavior. *Int J Behav Med* 1996;3:303-320.
17. Knudsen LV, Oberg M, Nielsen C, *et al.* Factor influencing help seeking, hearing aid uptake, hearing aid use and satisfaction with hearing aids: A review of the literature. *Trends Amplif* 2010;14(3):127-154.
18. Hayes SC, Strosahl KD, Wilson KG. *Acceptance and commitment therapy an experiential approach to behavior change*. New York: The Guilford Press, 1999.
19. Wentzel KR, Caldwell, K. Friendships, peer acceptance, and group membership: relations to academic achievement in middle school. *Child Dev* 1997;68(6):1198–209.
20. Li L, Moore D. Acceptance of disability and its correlates. *J Soc Psychol* 1998;138:13–25.
21. Stuijbergen A, Becker H, Blozis S, *et al.* Conceptualization and development of the chronic health conditions scale. *Issues Ment Health Nurs* 2008;29(2):101-114.
22. Andersson G, Willebrand M. What is coping? A critical review of the construct and its application in audiology. *Int J Audiol* 2003;42:S97-S103.

- 1  
2  
3 23. Karekla M, Panayiotou G. Coping and experiential avoidance: Unique or overlapping  
4 constructs?. *J Behav Ther Exp Psy* 2011;42:163-170.  
5  
6  
7 24. Goffman E. *Stigma: Notes on management of spoiled identity*. Englewood Cliffs, NJ:  
8 Prentice Hall, 1963.  
9  
10  
11 25. Héту R. The stigma attached to hearing impairment. *Scand Audiol*  
12 1996;25(Suppl.43):12-24.  
13  
14  
15 26. Danermark B, Gellerstedt LC. Hearing Impairment, Psychosocial Work Environment  
16 and Health. *Int J Audiol* 2004;43:383-389.  
17  
18  
19  
20 27. Linkowski DC. A scale to measure acceptance of disability. *Rehab Couns Bull*  
21 1971;14:236-244.  
22  
23  
24 28. McCracken LM, Vowles KE, Eccleston C. Acceptance of chronic pain: component  
25 analysis and revised assessment method. *Pain* 2004;107:159-166.  
26  
27  
28 29. McCracken LM, Vowles KE. Acceptance of chronic pain. *Curr Pain Headache Rep*  
29 2006;10(2):90-94.  
30  
31  
32  
33 30. Westin V, Hayes SC, Andersson G. Is it the sound or your relationship to it? The role  
34 of acceptance in predicting tinnitus impact. *Behav Res Ther* 2008;46:1259-1265.  
35  
36  
37 31. Demorset ME, Erdman SA. Development of the communication profile for the  
38 hearing impaired. *J Speech Lang Hear Res* 1987;52:129-143.  
39  
40  
41  
42 32. Gomez RG, Mandey SF. Coping-with-hearing-loss model for older adults. *Journal*  
43 *of Gerontology: Psychological Sciences* 2001;56B:223-225.  
44  
45  
46 33. Manchaiah VKC, Stephens D, Andersson G, *et al*. Use of the 'patient journey' model  
47 in the internet-based pre-fitting counseling of a person with hearing disability: Study  
48 protocol for a randomized controlled trial. *Trials* 2013;14(1):25.  
49  
50  
51  
52  
53  
54  
55  
56  
57  
58  
59  
60

- 1  
2  
3 34. Manchaiah VKC, Rönnerberg J, Andersson G, *et al.* Use of the ‘patient journey’ model  
4  
5 in the internet-based pre-fitting counseling of a person with hearing disability:  
6  
7 Lessons from a failed clinical trial. Submitted.  
8  
9  
10 35. Hayes SC, Strosahl KD, Wilson KG, *et al.* Measuring experiential avoidance: A  
11  
12 preliminary test of a working model. *Psychol Rec* 2004;54:553-578.  
13  
14 36. Noble W, Tyler R, Dunn C, *et al.* Hearing handicap ratings among different profiles  
15  
16 of adult cochlear implant users. *Ear Hear* 2008;29(1):112–120.  
17  
18 37. Herrmann C. International experience with the hospital anxiety and depression scale -  
19  
20 a review of validation data and clinical results. *J Psychosom Res* 1997;42(1):17–41.  
21  
22 38. Zigmond AS, Snaith RP. The hospital anxiety and depression scale. *Acta Psychiatr*  
23  
24 *Scand* 1983;67(6):361-370.  
25  
26  
27 39. Andersson G, Kaldo-Sandström V, Ström L, *et al.* Internet administration of the  
28  
29 Hospital Anxiety and Depression Scale (HADS) in a sample of tinnitus patients. *J*  
30  
31 *Psychosom Res* 2003;55:259-262.  
32  
33  
34 40. McConaughy EN, Prochaska JO, Velicer WF. Stages of change in psychotherapy:  
35  
36 measurement and sample profiles. *Psychother Theor Res Prac* 1983;20:368–375.  
37  
38  
39 41. DiClemente CC, Prochaska J. Toward a comprehensive, transtheoretical model of  
40  
41 change. Miller & Heather (eds.) *Treating Addictive Behaviors: Second Edition*. New  
42  
43 York: Plenum Press, 1989, pp. 3–24.  
44  
45 42. Laplante-Lévesque A, Hickson L, Worrall L. Stages of change in adults with acquired  
46  
47 hearing impairment seeking help for the first time: application of the transtheoretical  
48  
49 model in audiologic rehabilitation. *Ear Hear* 2013;34(4):447-457.  
50  
51  
52 43. Kline P. *An easy guide to factor analysis*. London: Routledge, 1994.  
53  
54  
55  
56  
57  
58  
59  
60

- 1  
2  
3  
4  
5  
6  
7  
8  
9  
10  
11  
12  
13  
14  
15  
16  
17  
18  
19  
20  
21  
22  
23  
24  
25  
26  
27  
28  
29  
30  
31  
32  
33  
34  
35  
36  
37  
38  
39  
40  
41  
42  
43  
44  
45  
46  
47  
48  
49  
50  
51  
52  
53  
54  
55  
56  
57  
58  
59  
60
44. Garson GD. Reliability analysis statnotes: Topics in multivariate analysis.  
<http://faculty.chass.ncsu.edu/garson/PA765/reliability.htm> (accessed 17 December 2012).
45. Kaiser HF. The applications of electronic computers to factor analysis. *Edu Psychol Meas* 1960;20:141-151.
46. Cattell RB. The scree test for the number of factors. *Multivar Behav Res* 1966;1:245-276.
47. Costello AB, Osborne JW. Best practice in exploratory factor analysis: Four recommendations for getting the most from your analysis. *Practical assessment, Research & Evaluation* 2005;10(7):1-9. Available online:  
<http://pareonline.net/pdf/v10n7.pdf>
48. Westin VZ, Schulin M, Hesser H, *et al.* Acceptance and commitment therapy versus tinnitus retraining therapy in the treatment of tinnitus: a randomised controlled trial. *Behav Res Ther* 2011;49(11):737-747.
49. Hesser H, Gustafsson T, Lundén C, *et al.* A randomized controlled trial of Internet-delivered cognitive behavior therapy and acceptance and commitment therapy in the treatment of tinnitus. *J Consult Clin Psychol* 2012;80(4):649-61.
50. Hayes SC, Villatte M, Levin M, *et al.* Open, aware, and active: contextual approaches as an emerging trend in the behavioral and cognitive therapies. *Annu Rev Clin Psychol* 2011;7:141-68.
51. Bond FW, Bunce D. The role of acceptance and job control in mental health, job satisfaction, and work performance. *J Appl Psychol* 2003;88:1057-1067.
52. Hayes SC, Stroschal K, Wilson KG, *et al.* Measuring experiential avoidance: a preliminary test of a working model. *Psychol Rec* 2004;54:553-578.

- 1  
2  
3 53. Bond FW, Lloyd J, Guenole N. The work-related acceptance and action questionnaire  
4  
5 (WAAQ): Initial psychometric findings and their implications for measuring  
6  
7 psychological flexibility in specific contexts. *J Occup Organ Psychol* 2012;1-25.  
8  
9  
10 54. Hayes SC, Strosahl KD, Wilson KG. *Acceptance and commitment therapy: The*  
11  
12 *process and practice of mindful change (2nd ed.)*. New York: Guilford Press, 2012.  
13  
14 55. McCracken LM. Learning to live with the pain: acceptance of pain predicts  
15  
16 adjustment in persons with chronic pain. *Pain* 1998;74:21-27.  
17  
18 56. Ruiz FJ. A Review of Acceptance and Commitment Therapy (ACT) Empirical  
19  
20 Evidence: Correlational, Experimental Psychopathology, Component and Outcome  
21  
22 Studies. *Int J Psych Psychol Ther* 2010;10(1):125-162.  
23  
24 57. Swan IRC, Gatehouse S. Factors influencing consultation for management of hearing  
25  
26 disability. *Brit J Audiol* 1990;24:155-160.  
27  
28 58. Whitehead LC. Methodological and ethical issues in internet-mediated research in the  
29  
30 field of health: an integrated review of the literature. *Soc Sci Med* 2007;65:782-791.  
31  
32 59. Glasgow RE, Nelson CC, Kearney KA. Reach, engagement, and retention in an  
33  
34 internet-based weight loss program in a multi-site randomized controlled trial. *J Med*  
35  
36 *Internet Res* 2007;9:e11, doi:10.2196/jmir.9.2.e11.  
37  
38 60. Thorén E, Andersson G, Lunner T. The use of research questionnaires in hearing  
39  
40 impaired adults: Online vs paper-and-pencil administration. *BMC Ear Nose Throat*  
41  
42 *Disord* 2012;12(1):1-12.  
43  
44 61. Buchanan T. Online assessment: Desirable or dangerous?. *Prof Psychol-Res Pr*  
45  
46 2002;33:148-154.  
47  
48  
49  
50  
51  
52  
53  
54  
55  
56  
57  
58  
59  
60



## Tables

**Table 1. Participants demographics**

|                                                                                                       |             |
|-------------------------------------------------------------------------------------------------------|-------------|
| <b>Age in years (M±SD)</b>                                                                            | 63.41±10.49 |
| <b>Gender (% male)</b>                                                                                | 50          |
| <b>Duration of hearing difficulties in years (M±SD)</b>                                               | 11.67±10.83 |
| <b>Consulted a healthcare professional specialising in hearing regarding hearing difficulties (%)</b> |             |
| ▪ Yes                                                                                                 | 65.6        |
| ▪ No                                                                                                  | 34.4        |
| <b>Education (%)</b>                                                                                  |             |
| ▪ Compulsory education                                                                                | 13.3        |
| ▪ Secondary education                                                                                 | 48.9        |
| ▪ Tertiary education                                                                                  | 37.8        |
| <b>Self-reported hearing disability acceptance (HDAQ; M±SD)</b>                                       | 36.88±7.85  |
| ▪ Activity engagement                                                                                 | 22.72±4.36  |
| ▪ Avoidance and suppression                                                                           | 14.16±4.65  |
| <b>Self-reported hearing disability (HHQ; M±SD)</b>                                                   | 34.96±9.95  |
| ▪ Emotional                                                                                           | 20.61±5.75  |
| ▪ Social                                                                                              | 14.32±4.85  |
| <b>Self-reported anxiety and depression (HADS; M±SD)</b>                                              | 14.77±7.50  |
| ▪ Anxiety                                                                                             | 7.04±4.43   |
| ▪ Depression                                                                                          | 7.70±3.81   |
| <b>Stages of change (URICA)</b>                                                                       |             |
| Readiness-to-change composite (M±SD)                                                                  | 39.41±8.63  |

Table 2. HDAQ principle components analysis (n=90)

| Scale:<br>7-item HDAQ                                                                        | Factor 1:<br>Activity<br>engagement | Factor 2:<br>Avoidance and<br>suppression |
|----------------------------------------------------------------------------------------------|-------------------------------------|-------------------------------------------|
| 1. I am leading a full life, even though I have a hearing problem                            | 0.854                               |                                           |
| 2. My life is going well, even though I have a hearing problem                               | 0.891                               |                                           |
| 3. Despite hearing problem, I can draw up and stick to a certain course in my life           | 0.857                               |                                           |
| 4. When my hearing problem increases, I can still take care of my responsibilities           | 0.763                               |                                           |
| 5. My hearing problem leads me to avoid certain situations                                   |                                     | 0.885                                     |
| 6. My hearing problem changes me as a person                                                 |                                     | 0.862                                     |
| 7. I spend a lot of time thinking about how things would be for me without a hearing problem |                                     | 0.734                                     |
| <b>Cronbach's <math>\alpha</math></b>                                                        | 0.90                                | 0.82                                      |
| <b>Percentage of variance</b>                                                                | 42.94                               | 32.75                                     |
| <b>Eigenvalue</b>                                                                            | 3.0                                 | 2.29                                      |

Table 3. Split-sample validation for the seven-item HDAQ

|                                         | Full sample<br>(n=90) | Split sample 1<br>(n=45) | Split sample 2<br>(n=45) |
|-----------------------------------------|-----------------------|--------------------------|--------------------------|
| <b>Percentage of variance explained</b> |                       |                          |                          |
| ▪ Factor 1: Activity engagement         | 42.94                 | 43.48                    | 44.13                    |
| ▪ Factor 2: Avoidance and suppression   | 32.75                 | 32.93                    | 31.80                    |
| ▪ Combined                              | 75.69                 | 76.41                    | 75.93                    |
| <b>Eigenvalue</b>                       |                       |                          |                          |
| ▪ Factor 1: Activity engagement         | 3.0                   | 3.0                      | 3.0                      |
| ▪ Factor 2: Avoidance and suppression   | 2.29                  | 2.3                      | 2.2                      |
| <b>Cronbach's <math>\alpha</math></b>   |                       |                          |                          |
| ▪ Factor 1: Activity engagement         | 0.90                  | 0.83                     | 0.82                     |
| ▪ Factor 2: Avoidance and suppression   | 0.82                  | 0.89                     | 0.90                     |
| ▪ Combined                              | 0.86                  | 0.88                     | 0.86                     |

**Table 4. Correlations between different scales (\* = p<0.01)**

|                                                           | HDAQ   | HDAQ<br>- 1 | HDAQ<br>- 2 | HHQ   | HADS | URICA-R |
|-----------------------------------------------------------|--------|-------------|-------------|-------|------|---------|
| <b>Self-reported hearing disability acceptance (HDAQ)</b> | 1.00   |             |             |       |      |         |
| <b>HDAQ Factor 1: Activity engagement</b>                 | 0.86*  | 1.00        |             |       |      |         |
| <b>HDAQ Factor 2: Avoidance and suppression</b>           | 0.88*  | 0.51*       | 1.00        |       |      |         |
| <b>Self-reported hearing disability (HHQ)</b>             | -0.70* | -0.50*      | -0.71*      | 1.00  |      |         |
| <b>Self-reported anxiety and depression (HADS)</b>        | -0.58* | -0.62*      | -0.39*      | 0.36* | 1.00 |         |
| <b>Readiness to change (URICA-R)</b>                      | -0.27* | -0.26*      | -0.29*      | 0.20  | 0.18 | 1.00    |

## Appendices

### Appendix 1. Hearing Disability Acceptance Questionnaire (HDAQ)

#### *Directions*

You will find numerous statements below. Please rate the truth of each statement as it applies to you. Use the following rating scale to make your choices:

| 1          | 2                | 3           | 4              | 5          | 6                  | 7           |
|------------|------------------|-------------|----------------|------------|--------------------|-------------|
| Never true | Very rarely true | Seldom true | Sometimes true | Often true | Almost always true | Always true |

For instance, if you believe that a statement is “Often true”, then you should circle “5” on the row following the statement.

#### *Items*

1. I am leading a full life, even though I have a hearing problem
2. My life is going well, even though I have a hearing problem
3. Despite hearing problem, I can draw up and stick to a certain course in my life
4. When my hearing problem increases, I can still take care of my responsibilities
5. My hearing problem leads me to avoid certain situations
6. My hearing problem changes me as a person
7. I spend a lot of time thinking about how things would be for me without a hearing problem

**Scoring**

Reverse score items 5, 6, and 7.

**Appendix 2. Removed items**

- My hearing problem has led me to decrease my engagement in former activities
- It is necessary for me to control my negative thoughts and feelings concerning my hearing problem
- I will be in better control of my life if I can control my negative thoughts about my hearing problem
- I have to struggle to get things done when I have a hearing problem
- I strive to suppress aversive thoughts and feelings related to my hearing problem

# The acceptance of hearing disability among adults experiencing hearing difficulties

Vinaya K. C. Manchaiah<sup>1,2</sup>, Peter Molander<sup>2</sup>, Jerker Rönnerberg<sup>2</sup>, Gerhard Andersson<sup>2,3</sup> and Thomas Lunner<sup>3,4</sup>

1. Department of Vision and Hearing Sciences, Anglia Ruskin University, Cambridge CB1 1PT, United Kingdom
2. Linnaeus Centre HEAD, Swedish Institute for Disability Research, Department of Behavioural Science and Learning, Linköping University, SE-58183, Linköping, Sweden
3. Department of Clinical Neuroscience, Division of Psychiatry, Karolinska Institutet, SE-17177, Stockholm, Sweden
4. Eriksholm Research Centre, Oticon A/S, 20 Rørtangevej, DK-3070 Snekkersten, Denmark

**Corresponding author** Dr. Vinaya K. C. Manchaiah

**Address** Department of Vision and Hearing Sciences,  
Coslett 204, Faculty of Science and Technology,  
Anglia Ruskin University  
Cambridge CB1 1PT  
United Kingdom

**E-mail** [vinaya.manchaiah@anglia.ac.uk](mailto:vinaya.manchaiah@anglia.ac.uk)

**Tel** +44 (0)1223 698653

**Fax** +44 (0)1223 695056

## Abstract

**Objective:** This study developed the Hearing Disability Acceptance Questionnaire (HDAQ) and tested its construct and concurrent validities. **Design:** Cross-sectional. **Participants:** A total of 90 participants who were experiencing hearing difficulties were recruited in the UK. **Outcome Measures:** The HDAQ was developed based on the Tinnitus Acceptance Questionnaire (TAQ). Participants completed self-report measures regarding hearing disability acceptance, hearing disability, symptoms of anxiety and depression, and a measure of stages of change. **Results:** The HDAQ has a two-factor structure that explains 75.69% of its variance. **The factors identified were activity engagement and avoidance and suppression.** The scale showed sufficient internal consistency (Cronbach's  $\alpha=0.86$ ). The HDAQ also had acceptable concurrent validity with regard to self-reported hearing disability, self-reported anxiety and depression, and readiness to change measures. **Conclusions:** Acceptance is likely an important aspect of coping with chronic health conditions. To our knowledge, no previously published and validated scale measures the acceptance of hearing disability; therefore, the HDAQ might be useful in future research. However, the role of acceptance in adjusting to hearing disability must be further investigated.

## Keywords

Hearing disability, hearing loss, acceptance, self-reported measure



## Summary

### Article Focus

- To develop the Hearing Disability Acceptance Questionnaire (HDAQ) and study its construct and concurrent validities.

### Key Message

- The results suggest that the HDAQ has a two-factor structure that explains 75.69% of its variance. The scale showed sufficient internal consistency (Cronbach's  $\alpha=0.86$ ).
- The results revealed the following significant correlations: a moderately strong negative correlation between acceptance and hearing disability; a moderately negative correlation between acceptance and symptoms of anxiety and depression; and a weak negative correlation between acceptance and readiness to change.
- The role of acceptance in adjusting to hearing disability must be further investigated.

### Strengths and Weaknesses

- Due to its online recruitment, the sample might not represent the general population. In addition, the online questionnaire might differ from a pen-and-paper format.
- Although there are measures that study coping indirectly, no well-established acceptance scale examines the concurrent validity of the HDAQ using the same construct (i.e., acceptance).

## Introduction

An individual with hearing loss might pass through several stages when help-seeking.<sup>1</sup> Edgett<sup>2</sup> emphasised that the decision-making process to seek help involves four major stages: (1) understanding hearing loss; (2) personal experience; (3) interactions with society; and (4) taking action. In another study, Engelund<sup>3</sup> suggested that patients proceed through four major stages while making a decision to seek help: (1) attracting attention; (2) becoming suspicious; (3) sensing tribulation; and (4) jeopardising the fundamental self. In our previous studies of the “patient’s journey” regarding people with hearing impairment (PHI), we took this idea further and studied this journey from the initial onset of problems through successful rehabilitation, thereby developing a patient journey model.<sup>4-5</sup> This model suggests that PHI experience seven major stages before, during, and after their audiological rehabilitation: (1) pre-awareness; (2) awareness; (3) movement; (4) diagnostics; (5) rehabilitation; (6) self-evaluation; and (7) resolution. On average, PHI can take 10 years or more to seek help after first noticing hearing difficulties; hence, this process might take many years.<sup>6</sup> Although additional research is necessary to better understand this process,<sup>7</sup> these previous studies nevertheless provide insight regarding the stages of adjusting to hearing loss, which might be an indirect (or secondary) indicator of the process of acceptance. In addition, it is clear from the aforementioned studies that becoming aware of and accepting a hearing disability play important roles in further progressing in their journey to manage their condition.

A few studies in the audiology literature have focused on the self-assessment of hearing loss,<sup>8</sup> immediate reactions to the diagnosis of hearing loss,<sup>9-10</sup> actions taken after failing screening tests,<sup>11</sup> attitudes toward hearing loss and the use of hearing aids,<sup>12-13</sup> and the ways in which PHI cope with their condition.<sup>14-16</sup> These studies provide further insights into the initial onset of the condition and how PHI manage their condition. A recent literature review suggested

1  
2  
3 that the acceptance of hearing loss prior to hearing aid fitting positively influences both  
4 hearing aid acquisition and subsequent hearing aid use.<sup>17</sup> However, numerous PHI who are  
5 aware that they have a problem but continue not to seeking help, use intervention strategies,  
6 or both remain. The literature can be confusing because the term “acceptance” is used  
7 synonymously with treatment/management option adherence, rather than studying this term  
8 using validated scales that capture different dimensions of this construct.  
9  
10  
11  
12  
13  
14  
15  
16  
17

18 In psychological terms, acceptance is *a process of actively taking in thoughts, memories,*  
19 *feelings, and bodily sensations in a specific situation without having to follow or change*  
20 *them.*<sup>18</sup> Acceptance can have various dimensions including self- and social acceptance that  
21 require both emotional and behavioural adaptations. For instance, the different views of what  
22 acceptance actually involves is evident from examining studies of education and academic  
23 success, where the term *peer acceptance* refers to a pupil who is judged to be a desirable  
24 interaction partner.<sup>19</sup> Disability studies have proposed that acceptance is the key component  
25 to adjusting to a disabling condition.<sup>20</sup> Although the acceptance of chronic conditions has  
26 often been studied from the perspectives of grief and loss, studying the acceptance of chronic  
27 conditions with regard to the perspectives of those living with it, with a focus on adaptation  
28 to and accepting change in one’s life, is also important.<sup>21</sup>  
29  
30  
31  
32  
33  
34  
35  
36  
37  
38  
39  
40  
41  
42  
43  
44

45 Experiential avoidance is similar to the concept of avoidance coping and can be defined as  
46 the opposite reaction to acceptance; that is, a person attempts to ignore and minimise the  
47 problems caused by hearing impairment.<sup>22</sup> However, some researchers have argued that  
48 coping and experiential avoidance are unique but overlapping constructs.<sup>23</sup> For example,  
49 although acceptance (i.e., experiential avoidance) loaded on to the same factors as emotion-  
50 focused and avoidant coping in a recent study of anxiety disorders, acceptance explained  
51  
52  
53  
54  
55  
56  
57  
58  
59  
60

1  
2  
3 additional variance when predicting psychological distress and well-being.<sup>23</sup> With regard to  
4  
5 hearing impairment, both acceptance and experiential avoidance can be interpreted in light of  
6  
7 stigma theory,<sup>24</sup> which has previously been applied in hearing impairment research.<sup>25-26</sup>  
8  
9

10  
11 Acceptance, in relation to hearing disability, has not been well defined; often this term is used  
12  
13 to refer to help-seeking behaviour and intervention (e.g., hearing aids) adoption. In effect,  
14  
15 differences exist in terms of the psychological and audiological ways of defining acceptance  
16  
17 with regard to hearing disability. However, various scales examine the acceptance of other  
18  
19 disabilities and chronic conditions.<sup>20-21, 27-30</sup> Past audiology studies have focused on coping;  
20  
21 however, coping is generally measured indirectly via questions related to communication  
22  
23 problems<sup>22</sup> [e.g., the Communication Strategies Subscale (CSS) in the Communication  
24  
25 Profile for the Hearing Impaired (CPHI) questionnaire].<sup>31</sup> The CPHI-CSS focuses on  
26  
27 maladaptive behaviours as well as verbal strategies and non-verbal strategies, and it provides  
28  
29 insight concerning poor adjustment to hearing impairment and poor social support.<sup>32</sup> To our  
30  
31 knowledge, however, no published and validated scale examines the acceptance of hearing  
32  
33 disability.  
34  
35  
36  
37  
38  
39

40  
41 The current study developed a self-report measure of hearing disability acceptance and  
42  
43 investigated its construct and concurrent validities. We focused on **the psychological** aspects  
44  
45 of acceptance in this study (i.e., experiential avoidance, which is the opposite of acceptance).  
46  
47  
48

## 49 **Method**

### 50 *Study Design and Participants*

51  
52  
53 The current study used cross-sectional data obtained during a clinical trial (i.e., pre-  
54  
55 intervention data) of a pre-fitting counselling program.<sup>33-34</sup> Ethical approval was received  
56  
57  
58  
59  
60

1  
2  
3 from the Research Ethics Committee, College of Human and Health Sciences, Swansea  
4 University. A study advertisement was offered in the UK through various sources including  
5 national newspapers, hearing loss charity websites (i.e., Action on Hearing Loss and Hearing  
6 Link), and local GP practice notice boards, inviting those who were experiencing hearing  
7 difficulties but not using hearing aids to those who had access to the Internet to participate in  
8 this study. Interested participants were encouraged to access the study website using the URL  
9 supplied. A total of 90 participants completed the informed consent form, provided  
10 demographic information, and completed four online questionnaires. These questionnaires  
11 included the Hearing Disability Acceptance Questionnaire (HDAQ), the Hearing Handicap  
12 Questionnaire (HHQ), the Hospital Anxiety and Depression Scale (HADS), and the  
13 University of Rhode Island Change Assessment (URICA) Scale.  
14  
15  
16  
17  
18  
19  
20  
21  
22  
23  
24  
25  
26  
27  
28  
29

### 30 ***Development of the HDAQ***

31 The HDAQ was developed based on the Tinnitus Acceptance Questionnaire (TAQ), which  
32 was developed in Sweden to study tinnitus acceptance.<sup>30</sup> The TAQ was based on the  
33 Acceptance and Action Questionnaire (AAQ),<sup>35</sup> and the Chronic Pain Acceptance  
34 Questionnaire-Revised (CPAQ-R);<sup>28</sup> some additional questions were included. The 12-item  
35 TAQ has two factors (*activity engagement* and *tinnitus suppression*), and it has sufficient  
36 internal consistency (Cronbach's  $\alpha=0.89$ ).<sup>30</sup> Like the TAQ, the HDAQ is a measure of  
37 experiential avoidance/acceptance. Its 12 items were taken from the TAQ, and the word  
38 "tinnitus" was replaced with "hearing problem". However, the 12 items were further reduced  
39 to 7 items (see the results section). Each item was rated on a 7-point Likert scale (1=never  
40 true, 7=always true). Total scores ranged from 7 to 49; higher scores indicate greater  
41 acceptance of hearing disability (see Appendix 1).  
42  
43  
44  
45  
46  
47  
48  
49  
50  
51  
52  
53  
54  
55  
56  
57  
58  
59  
60

### *Other Questionnaires*

The HHQ measures personal and social effects (i.e., emotional distress and discomfort, social withdrawal, and general participation restrictions).<sup>36</sup> The 12 questions of the HHQ are scored on a 5-point Likert scale (1=never, 5=almost always). Total scores range from 12 to 60, and higher scores indicate greater disability. The HHQ has acceptable internal consistency, with Cronbach's  $\alpha$  of 0.95 and 0.93 for the emotional and social scales, respectively.

The HADS was used to screen for symptoms of anxiety and depression. The HADS consists of 14 items, divided into two subscales: anxiety and depression.<sup>37</sup> Each item is scored from 0 to 3 (0=not at all, 3=most of the time) with a total score ranging from 0 to 42; higher scores indicate more self-reported anxiety and depressive symptoms. In general, the HADS has acceptable reliability ( $r=.84$ ), internal consistency ( $\alpha=.83$ ), and sensitivity and specificity (0.80),<sup>38</sup> including Internet administration.<sup>39</sup>

The URICA measures of stages of change across four subscales: pre-contemplation, contemplation, action, and maintenance.<sup>40-41</sup> The original URICA scale consists of 32 items; however, the current study used a modified version (*the problem* was replaced with *the hearing problem*) consisting of a 24-item scale.<sup>42</sup> Each item was rated on a 5-point Likert scale (1=strong disagreement, 5=strong agreement), and each subscale measured specific aspects. Most study participants were in the early help-seeking stages and had not received interventions for their hearing disabilities; therefore, the eight URICA items regarding maintenance were excluded because they were considered irrelevant for the sample. The total scores of each subscale ranged from 8 to 40. The subscale scores concerning the contemplation and action stages were added, from which the pre-contemplation stage scores were subtracted to obtain a readiness-to-change composite score (i.e., contemplation + action

1  
2  
3 – pre-contemplation). A recent study used this **modified** scale to investigate the use of the  
4  
5 URICA scale among adults with acquired hearing impairments seeking help for the first time.  
6  
7 This scale showed acceptable construct, concurrent, and predictive validities.<sup>42</sup>  
8  
9

### 10 11 *Data Analyses*

12  
13 All data analyses were performed using IBM SPSS Version 19 for Windows. **Descriptive**  
14  
15 **statistics were applied to examine demographic factors, and the assumption of normality (i.e.,**  
16  
17 **Shapiro-Wilk test values of 0.05) was tested before conducting a principal components**  
18  
19 **analysis (PCA).** A PCA was performed to reduce the correlated variables to a smaller set of  
20  
21 important composite variables and examine the factor structure.<sup>43</sup> Cronbach's  $\alpha$  was  
22  
23 calculated to assess the internal consistency of the HDAQ.<sup>44</sup> Pearson's correlations were  
24  
25 performed to examine the association among the following factors: hearing disability  
26  
27 acceptance, self-reported hearing disability, self-reported anxiety and depression, and  
28  
29 readiness to change.  
30  
31  
32  
33  
34  
35  
36

### 37 **Results**

38  
39 **The data were normally distributed.** Table 1 displays the sample characteristics. The average  
40  
41 age of participants and the average duration of hearing disability were 63.41 and 11.67 years,  
42  
43 respectively. The number of males and females in the sample was equal. In addition, nearly  
44  
45 two-thirds of participants had consulted **healthcare professionals specialised in hearing (e.g.,**  
46  
47 **audiologists, hearing aid dispensers, or ENT specialists)** at least once.  
48  
49

50 **[Insert Table 1 near here]**  
51  
52  
53  
54

### 55 *HDAQ factor structure*

1  
2  
3 A PCA with Varimax rotation was performed to examine the factor structure. Eigenvalues  
4  
5 were set at 1.0, and the limit for factor loadings was set at .40.<sup>43</sup> The relevant items were  
6  
7 reverse scored before analysis. The initial number of factors of interest was determined using  
8  
9 Kaiser's rule of eigenvalues greater than 1.0.<sup>45</sup> Subsequently, a scree plot was examined to  
10  
11 determine the number of factors to extract.<sup>46</sup>  
12  
13

14  
15  
16 In the first instance, the PCA resulted in a three-factor model for the 12 items. However,  
17  
18 cross loadings were noted for some items (i.e., items that loaded at .40 or above on two or  
19  
20 more factors). A PCA was also performed using Direct Oblimin rotation to determine  
21  
22 whether these cross loadings were due to the high correlations among items. The Kaiser-  
23  
24 Meyer-Olkin (KMO) measure of sampling adequacy was 0.86, and Bartlett's Test of  
25  
26 Sphericity was significant [ $\chi^2(66)=370.89, p<.001$ ]. The three factors explained 72.90% of  
27  
28 the variance in the 12-item HDAQ. Factor 1 accounted for 49.65% of the variance (with an  
29  
30 eigenvalue of 3.40); Factor 2 accounted for 13.95% of the variance (with an eigenvalue of  
31  
32 3.32); and Factor 3 accounted for 9.30% of the variance (with an eigenvalue of 2.01). The  
33  
34 Cronbach's  $\alpha$ s were 0.54, 0.50, 0.72, and 0.79 for Factors 1, 2, 3, and the overall 12 items,  
35  
36 respectively. The internal consistency of the overall scale was acceptable, although it was not  
37  
38 high for Factors 1 and 2.  
39  
40  
41  
42  
43  
44

45  
46 In the next stage, all items that resulted in cross loadings were removed from the analysis;  
47  
48 thus, five items were removed from the original 12-item scale (see Appendix 2 for the  
49  
50 removed items). Item reduction (i.e., minimising the set of variables while still accounting for  
51  
52 most of the variance) is one of the key goals of PCA. Moreover, removing the items with  
53  
54 complex psychometric properties (i.e., cross loadings) can improve the construct validity of  
55  
56 self-report measures.<sup>47</sup> Subsequently, the seven-item HDAQ resulted in a two-factor model  
57  
58  
59  
60



1  
2  
3 with no cross loading or outliers (see Table 2). The KMO measure of sampling adequacy was  
4  
5 0.82, and Bartlett's test of sphericity was significant ( $\chi^2[21]=363.93, p<.001$ ). These factors  
6  
7 explained 75.69% of the variance in the HDAQ. Factor 1 accounted for 42.94% of the  
8  
9 variance (with an eigenvalue of 3.00), and Factor 2 accounted for 32.75% (with an  
10  
11 eigenvalue of 2.29). The factors were identified as: (1) *activity engagement* (i.e., the pursuit  
12  
13 of life activities regardless of hearing disability) and (2) *avoidance and suppression* (i.e.,  
14  
15 attempts to avoid difficult listening situations as well as those to control and suppress the  
16  
17 thoughts and feeling related to hearing disability). A low *avoidance and suppression* score  
18  
19 indicates more avoidance and suppression because the items are reverse scored. Cronbach's  
20  
21 *as* were 0.90, 0.82, and 0.86 for Factors 1, 2, and the overall HDAQ, showing acceptable  
22  
23 internal consistency.<sup>44</sup> The correlation between the factors was  $r(90)=0.51, p<0.001$ , which  
24  
25 suggests that the two subscales were distinguishable but related.  
26  
27  
28

29  
30 **[Insert Table 2 near here]**  
31  
32

33  
34 Furthermore, we performed a PCA on the split sample to test for generalisability (i.e., split-  
35  
36 sample validation). The sample of 90 was randomly divided into two groups of 45. The PCA  
37  
38 for the first split sample of 45 on 12 items resulted in a three-factor model with cross  
39  
40 loadings. However, the PCA with 7 items (after the removal of the items with cross loadings)  
41  
42 resulted in a two-factor structure that explained 76.41% of the variance without cross  
43  
44 loadings. A PCA was also performed on the second split sample of 45 that also resulted in a  
45  
46 two-factor structure that explained 75.93% of the variance without cross loadings. The results  
47  
48 from both the split samples and the total sample were in close agreement (see Table 3),  
49  
50 strongly supporting the two-factor model.  
51  
52  
53

54 **[Insert Table 3 near here]**  
55  
56  
57  
58  
59  
60

### *Correlations Between the HDAQ and Other Scales*

Table 4 shows the Pearson's correlation coefficients between the HDAQ and other scales. The two HDAQ subscales were moderately associated with each other and strongly associated with the full scale. The results revealed the following significant correlations: a moderately strong negative correlation between acceptance and hearing disability; a moderately negative correlation between acceptance and symptoms of anxiety and depression; and a weak negative correlation between acceptance and readiness to change. These results suggest that those people higher hearing disability acceptance had less self-reported hearing disability, fewer self-reported symptoms of anxiety and depression, and lower readiness to change. In addition, a weak positive correlation was found between self-reported hearing disability and self-reported symptoms of anxiety and depression, which indicates that people with higher self-reported hearing disability are likely to have higher self-reported symptoms of anxiety and depression. Although differences were observed, the relationships between the individual subscales and other factors (i.e., hearing disability, symptoms of anxiety and depression, and readiness to change) did not differ much compared with the full HDAQ scale.

[Insert Table 4 near here]

### **Discussion**

Recent research has indicated the utility of psychological acceptance with regard to reducing the impact of chronic health conditions.<sup>29, 48-50</sup> The current paper is the first known attempt to extend this concept to hearing disabilities. After the necessary psychometrical modifications, a two-factor structure emerged for the HDAQ that was in line with the TAQ<sup>30</sup> and similar self-report measures related to acceptance.<sup>51</sup> Its internal consistency was equal to that of the most commonly used general acceptance scale, the AAQ-I.<sup>52</sup> However, research on an

1  
2  
3 updated version of this scale rejected a two-factor structure with regard to measuring  
4  
5 acceptance; rather, it suggested a unidimensional structure for the AAQ-II.<sup>53</sup> Our study did  
6  
7 not reveal a single-factor structure for the HDAQ. The first factor, *activity engagement*, was  
8  
9 assumed to reflect whether participants maintain a desired level of activity despite facing  
10  
11 obstacles. For example, a low level of activity engagement might be observed in a person  
12  
13 who stops dining with his or her friends at restaurants because they fear they might not be  
14  
15 able to follow the conversation. The other factor, *avoidance and suppression*, is the  
16  
17 unwillingness to experience events due to their related emotional distress. This concept is the  
18  
19 opposite of acceptance.<sup>54</sup>  
20  
21  
22  
23  
24

25 The HDAQ items were taken from the scale used to study acceptance in people with tinnitus,  
26  
27 which, in turn, was based on the AAQ and CPAQ-R. Although differences most likely exist  
28  
29 with regard to how people cope with tinnitus and hearing disability, similarities are found in  
30  
31 terms of how people cope with general chronic conditions. Acceptance is likely a key  
32  
33 component of adjusting to a disabling condition.<sup>20</sup> Thus, the study of acceptance in various  
34  
35 chronic conditions including hearing disability using the general framework applied in  
36  
37 ‘contextual psychology’ is valuable to both researchers and clinicians.  
38  
39  
40  
41  
42

43 The study results indicate that less acceptance was associated with increased emotional  
44  
45 distress. The relationship between the HDAQ and the HADS is interesting when compared  
46  
47 with similar studies that have indicated the pivotal role of acceptance with regard to  
48  
49 suffering. For instance, McCracken<sup>55</sup> found that acceptance was a stronger predictor of  
50  
51 psychosocial disability among patients with chronic pain than the degree of pain they  
52  
53 experienced. Numerous other studies have also found that greater acceptance is related to  
54  
55 psychological well-being (for a summary, see the review by Ruiz<sup>56</sup>). In the present study,  
56  
57  
58  
59  
60

1  
2  
3 greater acceptance was correlated with a more modest rating of hearing problems; therefore,  
4  
5 it might be **analogous** to the aforementioned findings regarding pain. Moreover, a recent  
6  
7 systematic review showed that self-reported hearing disability is a robust predictor of hearing  
8  
9 help-seeking, hearing aid acquisition, hearing aid use, and satisfaction with hearing  
10  
11 rehabilitation,<sup>17</sup> which suggests that self-reported hearing disability is an important factor in  
12  
13 the processes of accepting hearing loss and seeking appropriate interventions. Furthermore,  
14  
15 symptoms of depression and anxiety were elevated among those who scored higher on the  
16  
17 HHQ, which illustrates the far-reaching consequences that hearing loss might have. The  
18  
19 relationship between the HDAQ and readiness to change was negative and significant, which  
20  
21 implies that those who were more accepting of their current status were less prone to seek a  
22  
23 change in their current situation. The association between the HDAQ subscales and other  
24  
25 factors did not differ much. This finding might be because both subscales were found to have  
26  
27 strong associations with the full scale and moderate associations with each other.  
28  
29  
30  
31  
32  
33

34 Interestingly, although participants did not use hearing aids, two-thirds of the sample had  
35  
36 consulted **healthcare specialists** on at least one occasion. The reasons for these consultations  
37  
38 are likely to include: (1) acceptance of their condition (i.e., hearing disability); (2) a dilemma  
39  
40 regarding whether they had the condition and a desire to confirm this supposition with  
41  
42 clinicians; or (3) urging from their social partners. Although the reasons for not accepting  
43  
44 intervention (e.g., hearing aids) are not clear, they might be related to the perceived  
45  
46 seriousness of their hearing problems. Previous research suggests that a linear relationship  
47  
48 does not exist between hearing disability and its effects on activities and participation,<sup>8 57</sup>  
49  
50 which might help explain why not all people with hearing disabilities seek interventions.  
51  
52 Thus, studying hearing disability acceptance in psychological terms is important.  
53  
54  
55

56 Importantly, becoming suspicious or aware of a hearing disability does not mean that PHI  
57  
58  
59  
60

1  
2  
3 perceive their difficulties as significant enough to affect their communication and quality of  
4  
5 life. This gap between awareness and action is something that clinicians must be aware of  
6  
7 when they plan and recommend interventions, especially for patients coming to the hearing  
8  
9 clinic for the first time. In addition, much work is needed to understand how hearing  
10  
11 disability acceptance either facilitates or hinders the journey through this condition.  
12  
13

### 14 15 16 *Study Limitations*

17  
18 Although the current study focused on an important area of limited research, it nevertheless  
19  
20 has certain limitations. Acceptance with regard to hearing disability is not well defined, and  
21  
22 this scale might only focus on certain components of acceptance (i.e., psychological  
23  
24 acceptance). This limitation might partially explain why people with greater acceptance show  
25  
26 less readiness to change. However, this component is important to understand because it  
27  
28 might explain why many people who are aware of their hearing disability continue to refrain  
29  
30 from seeking professional help and appropriate interventions. Due to the online recruitment  
31  
32 method, the sample might not represent the general population, and caution must be used in  
33  
34 generalising the results.<sup>58-59</sup> Moreover, the relatively small sample size was surprising, given  
35  
36 that the advertisement was published in a national newspaper. The smaller sample size might  
37  
38 also be a limitation of this study. Validating this scale with a larger population is necessary,  
39  
40 although the split-sample validation strongly supported the two-factor model. The online  
41  
42 format of the questionnaire might differ from a pen-and-paper format, although web-based  
43  
44 questionnaires have been found to be reliable and valid.<sup>60-61</sup> The study results are only  
45  
46 relevant with regard to participants who experience hearing difficulties rather than typical  
47  
48 participants in clinical situations, although there might be some overlap because nearly two-  
49  
50 thirds of the current sample had previously consulted hearing specialists. Although indirect  
51  
52 coping measures exist, no well-established acceptance scale examines the concurrent validity  
53  
54  
55  
56  
57  
58  
59  
60

1  
2  
3 of the HDAQ using acceptance. Studying the associations between *acceptance* and other  
4  
5 factors such as *cognitive functions, personality, quality of life, and psychological well-being*  
6  
7 would have been interesting and useful; however, these factors were not included in the  
8  
9 *current study*. Furthermore, the predictive validity of the scale must be explored.  
10  
11

## 12 13 14 **Conclusions**

15  
16 In summary, our results suggest that additional exploration of the potential role that  
17  
18 acceptance plays in the process of adjusting to hearing problems would be a fruitful  
19  
20 endeavour, particularly with regard to understanding the role that acceptance plays in the  
21  
22 journey of PHI. However, much work remains to be done. Specifically, a coherent theoretical  
23  
24 framework is needed to account for what role, if any, acceptance plays with regard to  
25  
26 adjusting to hearing problems. One cannot take for granted the fact that the successful  
27  
28 management of other conditions, which all entails painful experiences (e.g., tinnitus, chronic  
29  
30 pain, and anxiety), are relevant to hearing disability, which instead is characterised by the  
31  
32 loss of (auditory) experiences. In addition, future research must examine the longitudinal  
33  
34 stability of acceptance and its relevance to objective measures of hearing disability as well as  
35  
36 the utility of the current structure of the HDAQ and whether it can successfully alleviate the  
37  
38 suffering usually associated with hearing disability.  
39  
40  
41  
42  
43  
44

## 45 46 **Acknowledgements**

47  
48 We thank Alexander Alasjö for his help with applying the online questionnaires and Ariane  
49  
50 Laplante-Lévesque for providing us with the revised version of the URICA scale used in this  
51  
52 study. This study was a part of the doctoral study of the first author, and portions of this  
53  
54 manuscript were presented as a doctoral thesis.  
55  
56  
57  
58  
59  
60

## Contributors

VM contributed to most of the work including data collection, analysis, and writing; PM contributed to the writing; JR contributed to study design and writing; GA contributed to study design and writing; and TL contributed to study design and writing.

## Funding

Grants from the Swedish Council for Working Life and Social Research 2009-0055 as well as the Swedish Research Council 2007-8654 partially funded this research.

## Ethical Approval

Ethical approval was received from the Research Ethics Committee, College of Human and Health Sciences, Swansea University.

## Data Sharing

No additional data are available.

## Conflict of interests

None.

## References

1. Stephens D, Kramer S.E. *Living with Hearing Difficulties: The Process of Enablement*. Chichester: Wiley, 2009.

- 1
  - 2
  - 3
  - 4
  - 5
  - 6
  - 7
  - 8
  - 9
  - 10
  - 11
  - 12
  - 13
  - 14
  - 15
  - 16
  - 17
  - 18
  - 19
  - 20
  - 21
  - 22
  - 23
  - 24
  - 25
  - 26
  - 27
  - 28
  - 29
  - 30
  - 31
  - 32
  - 33
  - 34
  - 35
  - 36
  - 37
  - 38
  - 39
  - 40
  - 41
  - 42
  - 43
  - 44
  - 45
  - 46
  - 47
  - 48
  - 49
  - 50
  - 51
  - 52
  - 53
  - 54
  - 55
  - 56
  - 57
  - 58
  - 59
  - 60
2. Edgett LMD. *Help-seeking for advanced rehabilitation by adults with hearing loss: an ecological model*. PhD Thesis. University of British Columbia, Vancouver, Canada, 2002.
  3. Engelund G. *Time for hearing – recognising process for the individual*. PhD Thesis. University of Copenhagen, Eriksholm, Denmark, 2006.
  4. Manchaiah VKC, Stephens D, Meredith R. The patient journey of adults with hearing impairment: the patients' view. *Clin Otol* 2011;36:227-234.
  5. Manchaiah VKC, Stephens D. The Patient journey: Living with hearing impairment. *J Acad Rehab Audiol* 2011;44:29-40.
  6. Davis A, Smith P, Ferguson M, *et al*. Acceptability, benefit and costs of early screening for hearing disability: A study of potential screening tests and models. *Health Tech Assess* 2007;11:1-294.
  7. Manchaiah VKC, Danermark B, Rönnerberg J, *et al*. Importance of 'process evaluation': Examples from studies on hearing impairment. Submitted
  8. Carson AJ. "What brings you here today?" The role of self-assessment in help-seeking for age-related hearing loss. *J Aging Stud* 2005;19:185-200.
  9. Martin FN, Krall L, O'Neal J. The diagnosis of acquired hearing loss. *ASHA* 1989;31:47-50.
  10. Light KJ, Looi V. Reactions to the diagnosis of a progressive hearing loss in adults. *J Acad Rehab Audiol* 2011;84:53-84.
  11. Meyer C, Hickson L, Khan A, *et al*. Investigations of the actions taken by adults who failed a telephone-based hearing screen. *Ear Hear* 2011;32(6):720-731.
  12. Brookes DN. The effect of attitude on benefit obtained from hearing aids. *Brit J Audiol* 1989;23:3-11.



- 1  
2  
3 13. Jerram JCK, Purdy SC. Technology, expectations, and adjustment to of hearing loss:  
4  
5 Predictors of hearing aid outcome. *J Am Acad Audiol* 2001;12:64-79.  
6
- 7  
8 14. Hallberg L, Carlsson S. A qualitative study of strategies for managing a hearing  
9  
10 impairment. *Brit J Audiol* 1991;25:201-211.
- 11  
12 15. Andersson G, Melin L, Lindberg P, *et al.* Development of a short scale for self-  
13  
14 assessment of experiences of hearing impairment: The Hearing Coping  
15  
16 Assessment. *Scand Audiol* 1995;24:147-154.
- 17  
18 16. Andersson G, Melin L, Lindberg P, *et al.* Elderly hearing impaired persons' coping  
19  
20 behavior. *Int J Behav Med* 1996;3:303-320.
- 21  
22 17. Knudsen LV, Oberg M, Nielsen C, *et al.* Factor influencing help seeking, hearing aid  
23  
24 uptake, hearing aid use and satisfaction with hearing aids: A review of the literature.  
25  
26 *Trends Amplif* 2010;14(3):127-154.
- 27  
28 18. Hayes SC, Strosahl KD, Wilson KG. *Acceptance and commitment therapy an*  
29  
30 *experiential approach to behavior change*. New York: The Guilford Press, 1999.
- 31  
32 19. Wentzel KR, Caldwell, K. Friendships, peer acceptance, and group membership:  
33  
34 relations to academic achievement in middle school. *Child Dev* 1997;68(6):1198-209.
- 35  
36 20. Li L, Moore D. Acceptance of disability and its correlates. *J Soc Psychol*  
37  
38 1998;138:13-25.
- 39  
40 21. Stuijbergen A, Becker H, Blozis S, *et al.* Conceptualization and development of the  
41  
42 chronic health conditions scale. *Issues Ment Health Nurs* 2008;29(2):101-114.
- 43  
44 22. Andersson G, Willebrand M. What is coping? A critical review of the construct and  
45  
46 its application in audiology. *Int J Audiol* 2003;42:S97-S103.
- 47  
48 23. Karekla M, Panayiotou G. Coping and experiential avoidance: Unique or overlapping  
49  
50 constructs?. *J Behav Ther Exp Psy* 2011;42:163-170.  
51  
52  
53  
54  
55  
56  
57  
58  
59  
60

- 1  
2  
3 24. Goffman E. *Stigma: Notes on management of spoiled identity*. Englewood Cliffs, NJ:  
4  
5 Prentice Hall, 1963.  
6  
7 25. Héту R. The stigma attached to hearing impairment. *Scand Audiol*  
8  
9 1996;25(Suppl.43):12-24.  
10  
11 26. Danermark B, Gellerstedt LC. Hearing Impairment, Psychosocial Work Environment  
12  
13 and Health. *Int J Audiol* 2004;43:383-389.  
14  
15 27. Linkowski DC. A scale to measure acceptance of disability. *Rehab Couns Bull*  
16  
17 1971;14:236-244.  
18  
19 28. McCracken LM, Vowles KE, Eccleston C. Acceptance of chronic pain: component  
20  
21 analysis and revised assessment method. *Pain* 2004;107:159-166.  
22  
23 29. McCracken LM, Vowles KE. Acceptance of chronic pain. *Curr Pain Headache Rep*  
24  
25 2006;10(2):90-94.  
26  
27 30. Westin V, Hayes SC, Andersson G. Is it the sound or your relationship to it? The role  
28  
29 of acceptance in predicting tinnitus impact. *Behav Res Ther* 2008;46:1259-1265.  
30  
31 31. Demorset ME, Erdman SA. Development of the communication profile for the  
32  
33 hearing impaired. *J Speech Lang Hear Res* 1987;52:129-143.  
34  
35 32. Gomez RG, Mandey SF. Coping-with-hearing-loss model for older adults. *Journal*  
36  
37 *of Gerontology: Psychological Sciences* 2001;56B:223-225.  
38  
39 33. Manchaiah VKC, Stephens D, Andersson G, *et al*. Use of the 'patient journey' model  
40  
41 in the internet-based pre-fitting counseling of a person with hearing disability: Study  
42  
43 protocol for a randomized controlled trial. *Trials* 2013;14(1):25.  
44  
45 34. Manchaiah VKC, Rönnberg J, Andersson G, *et al*. Use of the 'patient journey' model  
46  
47 in the internet-based pre-fitting counseling of a person with hearing disability:  
48  
49 Lessons from a failed clinical trial. Submitted.  
50  
51  
52  
53  
54  
55  
56  
57  
58  
59  
60

- 1  
2  
3 35. Hayes SC, Strosahl KD, Wilson KG, *et al.* Measuring experiential avoidance: A  
4 preliminary test of a working model. *Psychol Rec* 2004;54:553-578.  
5  
6  
7 36. Noble W, Tyler R, Dunn C, *et al.* Hearing handicap ratings among different profiles  
8 of adult cochlear implant users. *Ear Hear* 2008;29(1):112–120.  
9  
10  
11 37. Herrmann C. International experience with the hospital anxiety and depression scale -  
12 a review of validation data and clinical results. *J Psychosom Res* 1997;42(1):17–41.  
13  
14  
15 38. Zigmond AS, Snaith RP. The hospital anxiety and depression scale. *Acta Psychiatr*  
16  
17  
18  
19  
20  
21 39. Andersson G, Kaldo-Sandström V, Ström L, *et al.* Internet administration of the  
22 Hospital Anxiety and Depression Scale (HADS) in a sample of tinnitus patients. *J*  
23  
24  
25  
26  
27  
28 40. McConaughy EN, Prochaska JO, Velicer WF. Stages of change in psychotherapy:  
29 measurement and sample profiles. *Psychother Theor Res Prac* 1983;20:368–375.  
30  
31  
32 41. DiClemente CC, Prochaska J. Toward a comprehensive, transtheoretical model of  
33 change. Miller & Heather (eds.) *Treating Addictive Behaviors: Second Edition*. New  
34  
35  
36  
37  
38  
39 42. Laplante-Lévesque A, Hickson L, Worrall L. Stages of change in adults with acquired  
40 hearing impairment seeking help for the first time: application of the transtheoretical  
41  
42  
43  
44  
45  
46 43. Kline P. *An easy guide to factor analysis*. London: Routledge, 1994.  
47  
48 44. Garson GD. Reliability analysis statnotes: Topics in multivariate analysis.  
49  
50  
51  
52  
53  
54  
55  
56  
57  
58  
59  
60
- <http://faculty.chass.ncsu.edu/garson/PA765/reliability.htm> (accessed 17 December 2012).
45. Kaiser HF. The applications of electronic computers to factor analysis. *Edu Psychol Meas* 1960;20:141-151.

- 1  
2  
3 46. Cattell RB. The scree test for the number of factors. *Multivar Behav Res* 1966;1:245-  
4  
5 276.  
6  
7  
8 47. Costello AB, Osborne JW. Best practice in exploratory factor analysis: Four  
9  
10 recommendations for getting the most from your analysis. *Practical assessment,*  
11  
12 *Research & Evaluation* 2005;10(7):1-9. Available online:  
13  
14 <http://pareonline.net/pdf/v10n7.pdf>  
15  
16 48. Westin VZ, Schulin M, Hesser H, *et al.* Acceptance and commitment therapy versus  
17  
18 tinnitus retraining therapy in the treatment of tinnitus: a randomised controlled trial.  
19  
20 *Behav Res Ther* 2011;49(11):737-747.  
21  
22 49. Hesser H, Gustafsson T, Lundén C, *et al.* A randomized controlled trial of Internet-  
23  
24 delivered cognitive behavior therapy and acceptance and commitment therapy in the  
25  
26 treatment of tinnitus. *J Consult Clin Psychol* 2012;80(4):649–61.  
27  
28 50. Hayes SC, Villatte M, Levin M, *et al.* Open, aware, and active: contextual approaches  
29  
30 as an emerging trend in the behavioral and cognitive therapies. *Annu Rev Clin Psychol*  
31  
32 2011;7:141–68.  
33  
34 51. Bond FW, Bunce D. The role of acceptance and job control in mental health, job  
35  
36 satisfaction, and work performance. *J Appl Psychol* 2003;88:1057-1067.  
37  
38 52. Hayes SC, Strosahl K, Wilson KG, *et al.* Measuring experiential avoidance: a  
39  
40 preliminary test of a working model. *Psychol Rec* 2004;54:553–578.  
41  
42 53. Bond FW, Lloyd J, Guenole N. The work-related acceptance and action questionnaire  
43  
44 (WAAQ): Initial psychometric findings and their implications for measuring  
45  
46 psychological flexibility in specific contexts. *J Occup Organ Psychol* 2012:1-25.  
47  
48 54. Hayes SC, Strosahl KD, Wilson KG. *Acceptance and commitment therapy: The*  
49  
50 *process and practice of mindful change (2nd ed.)*. New York: Guilford Press, 2012.  
51  
52  
53  
54  
55  
56  
57  
58  
59  
60

- 1  
2  
3 55. McCracken LM. Learning to live with the pain: acceptance of pain predicts  
4 adjustment in persons with chronic pain. *Pain* 1998;74:21–27.  
5  
6  
7 56. Ruiz FJ. A Review of Acceptance and Commitment Therapy (ACT) Empirical  
8 Evidence: Correlational, Experimental Psychopathology, Component and Outcome  
9 Studies. *Int J Psych Psychol Ther* 2010;10(1):125-162.  
10  
11  
12 57. Swan IRC, Gatehouse S. Factors influencing consultation for management of hearing  
13 disability. *Brit J Audiol* 1990;24:155-160.  
14  
15  
16 58. Whitehead LC. Methodological and ethical issues in internet-mediated research in the  
17 field of health: an integrated review of the literature. *Soc Sci Med* 2007;65:782-791.  
18  
19  
20 59. Glasgow RE, Nelson CC, Kearney KA. Reach, engagement, and retention in an  
21 internet-based weight loss program in a multi-site randomized controlled trial. *J Med*  
22 *Internet Res* 2007;9:e11, doi:10.2196/jmir.9.2.e11.  
23  
24  
25 60. Thorén E, Andersson G, Lunner T. The use of research questionnaires in hearing  
26 impaired adults: Online vs paper-and-pencil administration. *BMC Ear Nose Throat*  
27 *Disord* 2012;12(1):1-12.  
28  
29  
30 61. Buchanan T. Online assessment: Desirable or dangerous?. *Prof Psychol-Res Pr*  
31 2002;33:148-154.  
32  
33  
34  
35  
36  
37  
38  
39  
40  
41  
42  
43  
44  
45  
46  
47  
48  
49  
50  
51  
52  
53  
54  
55  
56  
57  
58  
59  
60

## Tables

**Table 1. Participants demographics**

|                                                                                                       |             |
|-------------------------------------------------------------------------------------------------------|-------------|
| Age in years (M±SD)                                                                                   | 63.41±10.49 |
| Gender (% male)                                                                                       | 50          |
| Duration of hearing difficulties in years (M±SD)                                                      | 11.67±10.83 |
| <b>Consulted a healthcare professional specialising in hearing regarding hearing difficulties (%)</b> |             |
| ▪ Yes                                                                                                 | 65.6        |
| ▪ No                                                                                                  | 34.4        |
| <b>Education (%)</b>                                                                                  |             |
| ▪ Compulsory education                                                                                | 13.3        |
| ▪ Secondary education                                                                                 | 48.9        |
| ▪ Tertiary education                                                                                  | 37.8        |
| <b>Self-reported hearing disability acceptance (HDAQ; M±SD)</b>                                       | 36.88±7.85  |
| ▪ Activity engagement                                                                                 | 22.72±4.36  |
| ▪ Avoidance and suppression                                                                           | 14.16±4.65  |
| <b>Self-reported hearing disability (HHQ; M±SD)</b>                                                   | 34.96±9.95  |
| ▪ Emotional                                                                                           | 20.61±5.75  |
| ▪ Social                                                                                              | 14.32±4.85  |
| <b>Self-reported anxiety and depression (HADS; M±SD)</b>                                              | 14.77±7.50  |
| ▪ Anxiety                                                                                             | 7.04±4.43   |
| ▪ Depression                                                                                          | 7.70±3.81   |
| <b>Stages of change (URICA)</b>                                                                       |             |
| Readiness-to-change composite (M±SD)                                                                  | 39.41±8.63  |

Table 2. HDAQ principle components analysis (n=90)

| Scale:<br>7-item HDAQ                                                                        | Factor 1:<br>Activity<br>engagement | Factor 2:<br>Avoidance and<br>suppression |
|----------------------------------------------------------------------------------------------|-------------------------------------|-------------------------------------------|
| 1. I am leading a full life, even though I have a hearing problem                            | 0.854                               |                                           |
| 2. My life is going well, even though I have a hearing problem                               | 0.891                               |                                           |
| 3. Despite hearing problem, I can draw up and stick to a certain course in my life           | 0.857                               |                                           |
| 4. When my hearing problem increases, I can still take care of my responsibilities           | 0.763                               |                                           |
| 5. My hearing problem leads me to avoid certain situations                                   |                                     | 0.885                                     |
| 6. My hearing problem changes me as a person                                                 |                                     | 0.862                                     |
| 7. I spend a lot of time thinking about how things would be for me without a hearing problem |                                     | 0.734                                     |
| <b>Cronbach's <math>\alpha</math></b>                                                        | 0.90                                | 0.82                                      |
| <b>Percentage of variance</b>                                                                | 42.94                               | 32.75                                     |
| <b>Eigenvalue</b>                                                                            | 3.0                                 | 2.29                                      |

Table 3. Split-sample validation for the seven-item HDAQ

|                                         | Full sample<br>(n=90) | Split sample 1<br>(n=45) | Split sample 2<br>(n=45) |
|-----------------------------------------|-----------------------|--------------------------|--------------------------|
| <b>Percentage of variance explained</b> |                       |                          |                          |
| ▪ Factor 1: Activity engagement         | 42.94                 | 43.48                    | 44.13                    |
| ▪ Factor 2: Avoidance and suppression   | 32.75                 | 32.93                    | 31.80                    |
| ▪ Combined                              | 75.69                 | 76.41                    | 75.93                    |
| <b>Eigenvalue</b>                       |                       |                          |                          |
| ▪ Factor 1: Activity engagement         | 3.0                   | 3.0                      | 3.0                      |
| ▪ Factor 2: Avoidance and suppression   | 2.29                  | 2.3                      | 2.2                      |
| <b>Cronbach's <math>\alpha</math></b>   |                       |                          |                          |
| ▪ Factor 1: Activity engagement         | 0.90                  | 0.83                     | 0.82                     |
| ▪ Factor 2: Avoidance and suppression   | 0.82                  | 0.89                     | 0.90                     |
| ▪ Combined                              | 0.86                  | 0.88                     | 0.86                     |



Table 4. Correlations between different scales (\* = p&lt;0.01)

|                                                           | HDAQ   | HDAQ<br>- 1 | HDAQ<br>- 2 | HHQ   | HADS | URICA-R |
|-----------------------------------------------------------|--------|-------------|-------------|-------|------|---------|
| <b>Self-reported hearing disability acceptance (HDAQ)</b> | 1.00   |             |             |       |      |         |
| <b>HDAQ Factor 1: Activity engagement</b>                 | 0.86*  | 1.00        |             |       |      |         |
| <b>HDAQ Factor 2: Avoidance and suppression</b>           | 0.88*  | 0.51*       | 1.00        |       |      |         |
| <b>Self-reported hearing disability (HHQ)</b>             | -0.70* | -0.50*      | -0.71*      | 1.00  |      |         |
| <b>Self-reported anxiety and depression (HADS)</b>        | -0.58* | -0.62*      | -0.39*      | 0.36* | 1.00 |         |
| <b>Readiness to change (URICA-R)</b>                      | -0.27* | -0.26*      | -0.29*      | 0.20  | 0.18 | 1.00    |

## Appendices

### Appendix 1. Hearing Disability Acceptance Questionnaire (HDAQ)

#### *Directions*

You will find numerous statements below. Please rate the truth of each statement as it applies to you. Use the following rating scale to make your choices:

| 1          | 2                | 3           | 4              | 5          | 6                  | 7           |
|------------|------------------|-------------|----------------|------------|--------------------|-------------|
| Never true | Very rarely true | Seldom true | Sometimes true | Often true | Almost always true | Always true |

For instance, if you believe that a statement is “Often true”, then you should circle “5” on the row following the statement.

#### *Items*

1. I am leading a full life, even though I have a hearing problem
2. My life is going well, even though I have a hearing problem
3. Despite hearing problem, I can draw up and stick to a certain course in my life
4. When my hearing problem increases, I can still take care of my responsibilities
5. My hearing problem leads me to avoid certain situations
6. My hearing problem changes me as a person
7. I spend a lot of time thinking about how things would be for me without a hearing problem

### *Scoring*

Reverse score items 5, 6, and 7.

### **Appendix 2. Removed items**

- My hearing problem has led me to decrease my engagement in former activities
- It is necessary for me to control my negative thoughts and feelings concerning my hearing problem
- I will be in better control of my life if I can control my negative thoughts about my hearing problem
- I have to struggle to get things done when I have a hearing problem
- I strive to suppress aversive thoughts and feelings related to my hearing problem

STROBE 2007 (v4) Statement—Checklist of items that should be included in reports of *cross-sectional studies*

| Section/Topic                | Item # | Recommendation                                                                                                                                                                       | Reported on page # |
|------------------------------|--------|--------------------------------------------------------------------------------------------------------------------------------------------------------------------------------------|--------------------|
| Title and abstract           | 1      | (a) Indicate the study's design with a commonly used term in the title or the abstract                                                                                               | 1                  |
|                              |        | (b) Provide in the abstract an informative and balanced summary of what was done and what was found                                                                                  | 2 & 3              |
| <b>Introduction</b>          |        |                                                                                                                                                                                      |                    |
| Background/rationale         | 2      | Explain the scientific background and rationale for the investigation being reported                                                                                                 | 4 – 6              |
| Objectives                   | 3      | State specific objectives, including any prespecified hypotheses                                                                                                                     | 6                  |
| <b>Methods</b>               |        |                                                                                                                                                                                      |                    |
| Study design                 | 4      | Present key elements of study design early in the paper                                                                                                                              | 7                  |
| Setting                      | 5      | Describe the setting, locations, and relevant dates, including periods of recruitment, exposure, follow-up, and data collection                                                      | 7                  |
| Participants                 | 6      | (a) Give the eligibility criteria, and the sources and methods of selection of participants                                                                                          | 7                  |
| Variables                    | 7      | Clearly define all outcomes, exposures, predictors, potential confounders, and effect modifiers. Give diagnostic criteria, if applicable                                             | 7 – 9              |
| Data sources/<br>measurement | 8*     | For each variable of interest, give sources of data and details of methods of assessment (measurement). Describe comparability of assessment methods if there is more than one group | 7 - 9              |
| Bias                         | 9      | Describe any efforts to address potential sources of bias                                                                                                                            | 7, 15 & 16         |
| Study size                   | 10     | Explain how the study size was arrived at                                                                                                                                            | 7                  |
| Quantitative variables       | 11     | Explain how quantitative variables were handled in the analyses. If applicable, describe which groupings were chosen and why                                                         | 9                  |
| Statistical methods          | 12     | (a) Describe all statistical methods, including those used to control for confounding                                                                                                | 9                  |
|                              |        | (b) Describe any methods used to examine subgroups and interactions                                                                                                                  | 9                  |
|                              |        | (c) Explain how missing data were addressed                                                                                                                                          | NA                 |
|                              |        | (d) If applicable, describe analytical methods taking account of sampling strategy                                                                                                   | 9                  |
|                              |        | (e) Describe any sensitivity analyses                                                                                                                                                | 9                  |
| <b>Results</b>               |        |                                                                                                                                                                                      |                    |

|                          |     |                                                                                                                                                                                                              |         |
|--------------------------|-----|--------------------------------------------------------------------------------------------------------------------------------------------------------------------------------------------------------------|---------|
| Participants             | 13* | (a) Report numbers of individuals at each stage of study—eg numbers potentially eligible, examined for eligibility, confirmed eligible, included in the study, completing follow-up, and analysed            | 9       |
|                          |     | (b) Give reasons for non-participation at each stage                                                                                                                                                         | NA      |
|                          |     | (c) Consider use of a flow diagram                                                                                                                                                                           | NA      |
| Descriptive data         | 14* | (a) Give characteristics of study participants (eg demographic, clinical, social) and information on exposures and potential confounders                                                                     | 9 & 24  |
|                          |     | (b) Indicate number of participants with missing data for each variable of interest                                                                                                                          | NA      |
| Outcome data             | 15* | Report numbers of outcome events or summary measures                                                                                                                                                         | 9 - 12  |
| Main results             | 16  | (a) Give unadjusted estimates and, if applicable, confounder-adjusted estimates and their precision (eg, 95% confidence interval). Make clear which confounders were adjusted for and why they were included | 9 - 12  |
|                          |     | (b) Report category boundaries when continuous variables were categorized                                                                                                                                    | 9 - 12  |
|                          |     | (c) If relevant, consider translating estimates of relative risk into absolute risk for a meaningful time period                                                                                             | 9 - 12  |
| Other analyses           | 17  | Report other analyses done—eg analyses of subgroups and interactions, and sensitivity analyses                                                                                                               | 9 - 12  |
| <b>Discussion</b>        |     |                                                                                                                                                                                                              |         |
| Key results              | 18  | Summarise key results with reference to study objectives                                                                                                                                                     | 12 - 15 |
| Limitations              | 19  | Discuss limitations of the study, taking into account sources of potential bias or imprecision. Discuss both direction and magnitude of any potential bias                                                   | 15 & 16 |
| Interpretation           | 20  | Give a cautious overall interpretation of results considering objectives, limitations, multiplicity of analyses, results from similar studies, and other relevant evidence                                   | 15 & 16 |
| Generalisability         | 21  | Discuss the generalisability (external validity) of the study results                                                                                                                                        | 15 & 16 |
| <b>Other information</b> |     |                                                                                                                                                                                                              |         |
| Funding                  | 22  | Give the source of funding and the role of the funders for the present study and, if applicable, for the original study on which the present article is based                                                | 17      |

\*Give information separately for cases and controls in case-control studies and, if applicable, for exposed and unexposed groups in cohort and cross-sectional studies.

**Note:** An Explanation and Elaboration article discusses each checklist item and gives methodological background and published examples of transparent reporting. The STROBE checklist is best used in conjunction with this article (freely available on the Web sites of PLoS Medicine at <http://www.plosmedicine.org/>, Annals of Internal Medicine at <http://www.annals.org/>, and Epidemiology at <http://www.epidem.com/>). Information on the STROBE Initiative is available at [www.strobe-statement.org](http://www.strobe-statement.org).



**The acceptance of hearing disability among adults  
experiencing hearing difficulties**

|                                 |                                                                                                                                                                                                                                                                                                                                                                                                                                                                                                                                                         |
|---------------------------------|---------------------------------------------------------------------------------------------------------------------------------------------------------------------------------------------------------------------------------------------------------------------------------------------------------------------------------------------------------------------------------------------------------------------------------------------------------------------------------------------------------------------------------------------------------|
| Journal:                        | <i>BMJ Open</i>                                                                                                                                                                                                                                                                                                                                                                                                                                                                                                                                         |
| Manuscript ID:                  | bmjopen-2013-004066.R2                                                                                                                                                                                                                                                                                                                                                                                                                                                                                                                                  |
| Article Type:                   | Research                                                                                                                                                                                                                                                                                                                                                                                                                                                                                                                                                |
| Date Submitted by the Author:   | 23-Nov-2013                                                                                                                                                                                                                                                                                                                                                                                                                                                                                                                                             |
| Complete List of Authors:       | C. Manchaiah, Vinaya K.; Anglia Ruskin University, Department of Vision and Hearing Sciences<br>Molander, Peter; Linköping University, Department of Behavioural Sciences and Learning<br>Ronnberg, Jerker; Linköping University, Linnaeus Centre HEAD, Swedish Institute for Disability Research, Department of Behavioral Science and Learning<br>Andersson, Gerhard; Linköping University,<br>Lunner, Thomas; Linköping University, Department of Behavioural Sciences and Learning, Linnaeus Centre HEAD, Swedish Institute for Disability Research |
| <b>Primary Subject Heading</b>: | Ear, nose and throat/otolaryngology                                                                                                                                                                                                                                                                                                                                                                                                                                                                                                                     |
| Secondary Subject Heading:      | Ear, nose and throat/otolaryngology                                                                                                                                                                                                                                                                                                                                                                                                                                                                                                                     |
| Keywords:                       | Adult otolaryngology < OTOLARYNGOLOGY, Audiology < OTOLARYNGOLOGY, PUBLIC HEALTH                                                                                                                                                                                                                                                                                                                                                                                                                                                                        |
|                                 |                                                                                                                                                                                                                                                                                                                                                                                                                                                                                                                                                         |

SCHOLARONE™  
Manuscripts

only

# The acceptance of hearing disability among adults experiencing hearing difficulties

Vinaya K. C. Manchaiah<sup>1,2</sup>, Peter Molander<sup>2</sup>, Jerker Rönnerberg<sup>2</sup>, Gerhard Andersson<sup>2,3</sup> and Thomas Lunner<sup>3,4</sup>

1. Department of Vision and Hearing Sciences, Anglia Ruskin University, Cambridge CB1 1PT, United Kingdom
2. Linnaeus Centre HEAD, Swedish Institute for Disability Research, Department of Behavioural Science and Learning, Linköping University, SE-58183, Linköping, Sweden
3. Department of Clinical Neuroscience, Division of Psychiatry, Karolinska Institutet, SE-17177, Stockholm, Sweden
4. Eriksholm Research Centre, Oticon A/S, 20 Rørtangevej, DK-3070 Snekkersten, Denmark

**Corresponding author** Dr. Vinaya K. C. Manchaiah

**Address** Department of Vision and Hearing Sciences,  
Coslett 204, Faculty of Science and Technology,  
Anglia Ruskin University  
Cambridge CB1 1PT  
United Kingdom

**E-mail** [vinaya.manchaiah@anglia.ac.uk](mailto:vinaya.manchaiah@anglia.ac.uk)

**Tel** +44 (0)1223 698653

**Fax** +44 (0)1223 695056

## Keywords

Hearing disability, hearing loss, acceptance, self-reported measure

## Abstract

**Objective:** This study developed the Hearing Disability Acceptance Questionnaire (HDAQ) and tested its construct and concurrent validities.

**Design:** Cross-sectional.

**Participants:** A total of 90 participants who were experiencing hearing difficulties were recruited in the UK.

**Outcome Measures:** The HDAQ was developed based on the Tinnitus Acceptance Questionnaire (TAQ). Participants completed self-report measures regarding hearing disability acceptance, hearing disability, symptoms of anxiety and depression, and a measure of stages of change.

**Results:** The HDAQ has a two-factor structure that explains 75.69% of its variance. The factors identified were *activity engagement* and *avoidance and suppression*. The scale showed sufficient internal consistency (Cronbach's  $\alpha=0.86$ ). The HDAQ also had acceptable concurrent validity with regard to self-reported hearing disability, self-reported anxiety and depression, and readiness to change measures.

**Conclusions:** Acceptance is likely an important aspect of coping with chronic health conditions. To our knowledge, no previously published and validated scale measures the acceptance of hearing disability; therefore, the HDAQ might be useful in future research. However, the role of acceptance in adjusting to hearing disability must be further investigated.



## Summary

### Article Focus

- To develop the Hearing Disability Acceptance Questionnaire (HDAQ) and study its construct and concurrent validities.

### Key Message

- The results suggest that the HDAQ has a two-factor structure that explains 75.69% of its variance. The scale showed sufficient internal consistency (Cronbach's  $\alpha=0.86$ ).
- The results revealed the following significant correlations: a moderately strong negative correlation between acceptance and hearing disability; a moderately negative correlation between acceptance and symptoms of anxiety and depression; and a weak negative correlation between acceptance and readiness to change.
- The role of acceptance in adjusting to hearing disability must be further investigated.

### Strengths and Weaknesses

- Due to its online recruitment, the sample might not represent the general population. In addition, the online questionnaire might differ from a pen-and-paper format in terms of data quality.
- Although there are measures that study coping indirectly, no well-established acceptance scale examines the concurrent validity of the HDAQ using the same construct (i.e., acceptance).

## Introduction

An individual with hearing loss might pass through several stages when help-seeking.<sup>1</sup> Edgett<sup>2</sup> emphasised that the decision-making process to seek help involves four major stages: (1) understanding hearing loss; (2) personal experience; (3) interactions with society; and (4) taking action. In another study, Engelund<sup>3</sup> suggested that patients proceed through four major stages while making a decision to seek help: (1) attracting attention; (2) becoming suspicious; (3) sensing tribulation; and (4) jeopardising the fundamental self. In our previous studies of the “patient’s journey” regarding people with hearing impairment (PHI), we took this idea further and studied this journey from the initial onset of problems through successful rehabilitation, thereby developing a patient journey model.<sup>4-5</sup> This model suggests that PHI experience seven major stages before, during, and after their audiological rehabilitation: (1) pre-awareness; (2) awareness; (3) movement; (4) diagnostics; (5) rehabilitation; (6) self-evaluation; and (7) resolution. On average, PHI can take 10 years or more to seek help after first noticing hearing difficulties; hence, this process might take many years.<sup>6</sup> Although additional research is necessary to better understand this process,<sup>7</sup> these previous studies nevertheless provide insight regarding the stages of adjusting to hearing loss, which might be an indirect (or secondary) indicator of the process of acceptance. In addition, it is clear from the aforementioned studies that becoming aware of and accepting a hearing disability play important roles in further progressing in their journey to manage their condition.

A few studies in the audiology literature have focused on the self-assessment of hearing loss,<sup>8</sup> immediate reactions to the diagnosis of hearing loss,<sup>9-10</sup> actions taken after failing screening tests,<sup>11</sup> attitudes toward hearing loss and the use of hearing aids,<sup>12-13</sup> and the ways in which PHI cope with their condition.<sup>14-16</sup> These studies provide further insights into the initial onset of the condition and how PHI manage their condition. A recent literature review suggested

1  
2  
3 that the acceptance of hearing loss prior to hearing aid fitting positively influences both  
4 hearing aid acquisition and subsequent hearing aid use.<sup>17</sup> However, numerous PHI who are  
5 aware that they have a problem but continue not to seeking help, use intervention strategies,  
6 or both remain. The literature can be confusing because the term “acceptance” is used  
7 synonymously with treatment/management option adherence, rather than studying this term  
8 using validated scales that capture different dimensions of this construct.  
9  
10  
11  
12  
13  
14  
15  
16  
17

18 In psychological terms, acceptance is *a process of actively taking in thoughts, memories,*  
19 *feelings, and bodily sensations in a specific situation without having to follow or change*  
20 *them.*<sup>18</sup> Acceptance can have various dimensions including self- and social acceptance that  
21 require both emotional and behavioural adaptations. For instance, the different views of what  
22 acceptance actually involves is evident from examining studies of education and academic  
23 success, where the term *peer acceptance* refers to a pupil who is judged to be a desirable  
24 interaction partner.<sup>19</sup> Disability studies have proposed that acceptance is the key component  
25 to adjusting to a disabling condition.<sup>20</sup> Although the acceptance of chronic conditions has  
26 often been studied from the perspectives of grief and loss, studying the acceptance of chronic  
27 conditions with regard to the perspectives of those living with it, with a focus on adaptation  
28 to and accepting change in one’s life, is also important.<sup>21</sup>  
29  
30  
31  
32  
33  
34  
35  
36  
37  
38  
39  
40  
41  
42  
43  
44

45 Experiential avoidance is similar to the concept of avoidance coping and can be defined as  
46 the opposite reaction to acceptance; that is, a person attempts to ignore and minimise the  
47 problems caused by hearing impairment.<sup>22</sup> However, some researchers have argued that  
48 coping and experiential avoidance are unique but overlapping constructs.<sup>23</sup> For example,  
49 although acceptance (i.e., experiential avoidance) loaded on to the same factors as emotion-  
50 focused and avoidant coping in a recent study of anxiety disorders, acceptance explained  
51  
52  
53  
54  
55  
56  
57  
58  
59  
60

1  
2  
3 additional variance when predicting psychological distress and well-being.<sup>23</sup> With regard to  
4  
5 hearing impairment, both acceptance and experiential avoidance can be interpreted in light of  
6  
7 stigma theory,<sup>24</sup> which has previously been applied in hearing impairment research.<sup>25-26</sup>  
8  
9

10  
11 Acceptance, in relation to hearing disability, has not been well defined; often this term is used  
12  
13 to refer to help-seeking behaviour and intervention (e.g., hearing aids) adoption. In effect,  
14  
15 differences exist in terms of the psychological and audiological ways of defining acceptance  
16  
17 with regard to hearing disability. However, various scales examine the acceptance of other  
18  
19 disabilities and chronic conditions.<sup>20-21, 27-30</sup> Past audiology studies have focused on coping;  
20  
21 however, coping is generally measured indirectly via questions related to communication  
22  
23 problems<sup>22</sup> [e.g., the Communication Strategies Subscale (CSS) in the Communication  
24  
25 Profile for the Hearing Impaired (CPHI) questionnaire].<sup>31</sup> The CPHI-CSS focuses on  
26  
27 maladaptive behaviours as well as verbal strategies and non-verbal strategies, and it provides  
28  
29 insight concerning poor adjustment to hearing impairment and poor social support.<sup>32</sup> To our  
30  
31 knowledge, however, no published and validated scale examines the acceptance of hearing  
32  
33 disability.  
34  
35  
36  
37  
38  
39

40  
41 The current study developed a self-report measure of hearing disability acceptance and  
42  
43 investigated its construct and concurrent validities. We focused on the psychological aspects  
44  
45 of acceptance in this study (i.e., experiential avoidance, which is the opposite of acceptance).  
46  
47  
48

## 49 **Method**

### 50 *Study Design and Participants*

51  
52  
53 The current study used cross-sectional data obtained during a clinical trial (i.e., pre-  
54  
55 intervention data) of a pre-fitting counselling program.<sup>33-34</sup> Ethical approval was received  
56  
57  
58  
59  
60

1  
2  
3 from the Research Ethics Committee, College of Human and Health Sciences, Swansea  
4 University. A study advertisement was offered in the UK through various sources including  
5 national newspapers, hearing loss charity websites (i.e., Action on Hearing Loss and Hearing  
6 Link), and local GP practice notice boards, inviting those who were experiencing hearing  
7 difficulties but not using hearing aids to those who had access to the Internet to participate in  
8 this study. Interested participants were encouraged to access the study website using the URL  
9 supplied. A total of 90 participants completed the informed consent form, provided  
10 demographic information, and completed four online questionnaires. These questionnaires  
11 included the Hearing Disability Acceptance Questionnaire (HDAQ), the Hearing Handicap  
12 Questionnaire (HHQ), the Hospital Anxiety and Depression Scale (HADS), and the  
13 University of Rhode Island Change Assessment (URICA) Scale.  
14  
15  
16  
17  
18  
19  
20  
21  
22  
23  
24  
25  
26  
27  
28  
29

### 30 ***Development of the HDAQ***

31 The HDAQ was developed based on the Tinnitus Acceptance Questionnaire (TAQ), which  
32 was developed in Sweden to study tinnitus acceptance.<sup>30</sup> The TAQ was based on the  
33 Acceptance and Action Questionnaire (AAQ),<sup>35</sup> and the Chronic Pain Acceptance  
34 Questionnaire-Revised (CPAQ-R);<sup>28</sup> some additional questions were included. The 12-item  
35 TAQ has two factors (*activity engagement* and *tinnitus suppression*), and it has sufficient  
36 internal consistency (Cronbach's  $\alpha=0.89$ ).<sup>30</sup> Like the TAQ, the HDAQ is a measure of  
37 experiential avoidance/acceptance. Its 12 items were taken from the TAQ, and the word  
38 "tinnitus" was replaced with "hearing problem". However, the 12 items were further reduced  
39 to 7 items (see the results section). Each item was rated on a 7-point Likert scale (1=never  
40 true, 7=always true). Total scores ranged from 7 to 49; higher scores indicate greater  
41 acceptance of hearing disability (see Appendix 1).  
42  
43  
44  
45  
46  
47  
48  
49  
50  
51  
52  
53  
54  
55  
56  
57  
58  
59  
60

### *Other Questionnaires*

The HHQ measures personal and social effects (i.e., emotional distress and discomfort, social withdrawal, and general participation restrictions).<sup>36</sup> The 12 questions of the HHQ are scored on a 5-point Likert scale (1=never, 5=almost always). Total scores range from 12 to 60, and higher scores indicate greater disability. The HHQ has acceptable internal consistency, with Cronbach's  $\alpha$  of 0.95 and 0.93 for the emotional and social scales, respectively.

The HADS was used to screen for symptoms of anxiety and depression. The HADS consists of 14 items, divided into two subscales: anxiety and depression.<sup>37</sup> Each item is scored from 0 to 3 (0=not at all, 3=most of the time) with a total score ranging from 0 to 42; higher scores indicate more self-reported anxiety and depressive symptoms. The HADS has acceptable reliability ( $r=.84$ ) and internal consistency ( $\alpha=.83$ ),<sup>38</sup> including Internet administration.<sup>39</sup> In addition, the HADS also has acceptable sensitivity and specificity (AUC=0.80) as indicated in the receiver operator characteristic (ROC) curves.

The URICA measures of stages of change across four subscales: pre-contemplation, contemplation, action, and maintenance.<sup>40-41</sup> The original URICA scale consists of 32 items; however, the current study used a modified version (*the problem* was replaced with *the hearing problem*) consisting of a 24-item scale.<sup>42</sup> Each item was rated on a 5-point Likert scale (1=strong disagreement, 5=strong agreement), and each subscale measured specific aspects. Most study participants were in the early help-seeking stages and had not received interventions for their hearing disabilities; therefore, the eight URICA items regarding maintenance were excluded because they were considered irrelevant for the sample. The total scores of each subscale ranged from 8 to 40. The subscale scores concerning the

1  
2  
3 contemplation and action stages were added, from which the pre-contemplation stage scores  
4  
5 were subtracted to obtain a readiness-to-change composite score (i.e., contemplation + action  
6  
7 – pre-contemplation). A recent study used this modified scale to investigate the use of the  
8  
9 URICA scale among adults with acquired hearing impairments seeking help for the first time.  
10  
11 This scale showed acceptable construct, concurrent, and predictive validities.<sup>42</sup>  
12  
13

### 14 15 16 **Data Analyses**

17  
18 All data analyses were performed using IBM SPSS Version 19 for Windows. Descriptive  
19  
20 statistics were applied to examine demographic factors, and the assumption of normality (i.e.,  
21  
22 Shapiro-Wilk test values of 0.05) was tested before conducting a principal components  
23  
24 analysis (PCA). A PCA was performed to reduce the correlated variables to a smaller set of  
25  
26 important composite variables and examine the factor structure.<sup>43</sup> Cronbach's  $\alpha$ s was  
27  
28 calculated to assess the internal consistency of the HDAQ.<sup>44</sup> Pearson's correlations were  
29  
30 performed to examine the association among the following factors: hearing disability  
31  
32 acceptance, self-reported hearing disability, self-reported anxiety and depression, and  
33  
34 readiness to change.  
35  
36  
37  
38  
39  
40

### 41 **Results**

42  
43 The data was normally distributed. Table 1 displays the sample characteristics. The average  
44  
45 age of participants and the average duration of hearing disability were 63.41 and 11.67 years,  
46  
47 respectively. The number of males and females in the sample was equal. In addition, nearly  
48  
49 two-thirds of participants had consulted healthcare professionals specialised in hearing (e.g.,  
50  
51 audiologists, hearing aid dispensers, or ENT specialists) at least once.  
52  
53  
54

55 **[Insert Table 1 near here]**  
56  
57  
58  
59  
60

### *HDAQ factor structure*

A PCA with Varimax rotation was performed to examine the factor structure. Eigenvalues were set at 1.0, and the limit for factor loadings was set at .40.<sup>43</sup> The relevant items were reverse scored before analysis. The initial number of factors of interest was determined using Kaiser's rule of eigenvalues greater than 1.0.<sup>45</sup> Subsequently, a scree plot was examined to determine the number of factors to extract.<sup>46</sup>

In the first instance, the PCA resulted in a three-factor model for the 12 items. However, cross loadings were noted for some items (i.e., items that loaded at .40 or above on two or more factors). A PCA was also performed using Direct Oblimin rotation to determine whether these cross loadings were due to the high correlations among items. The Kaiser-Meyer-Olkin (KMO) measure of sampling adequacy was 0.86 with a reference value of 0 to 1.0, and Bartlett's Test of Sphericity was significant [ $\chi^2(66)=370.89, p<.001$ ]. The three factors explained 72.90% of the variance in the 12-item HDAQ. Factor 1 accounted for 49.65% of the variance (with an eigenvalue of 3.40); Factor 2 accounted for 13.95% of the variance (with an eigenvalue of 3.32); and Factor 3 accounted for 9.30% of the variance (with an eigenvalue of 2.01). The Cronbach's  $\alpha$ s were 0.54, 0.50, 0.72, and 0.79 for Factors 1, 2, 3, and the overall 12 items, respectively. The internal consistency of the overall scale was acceptable, although it was not high for Factors 1 and 2.

In the next stage, all items that resulted in cross loadings were removed from the analysis; thus, five items were removed from the original 12-item scale (see Appendix 2 for the removed items). Item reduction (i.e., minimising the set of variables while still accounting for most of the variance) is one of the key goals of PCA. Moreover, removing the items with



1  
2  
3 complex psychometric properties (i.e., cross loadings) can improve the construct validity of  
4 self-report measures.<sup>47</sup> Subsequently, the seven-item HDAQ resulted in a two-factor model  
5  
6 with no cross loading or outliers (see Table 2). The KMO measure of sampling adequacy was  
7  
8 0.82, and Bartlett's Test of Sphericity was significant [ $\chi^2(21)=363.93, p<.001$ ]. These factors  
9  
10 explained 75.69% of the variance in the HDAQ. Factor 1 accounted for 42.94% of the  
11  
12 variance (with an eigenvalue of 3.00), and Factor 2 accounted for 32.75% (with an  
13  
14 eigenvalue of 2.29). The factors were identified as: (1) *activity engagement* (i.e., the pursuit  
15  
16 of life activities regardless of hearing disability) and (2) *avoidance and suppression* (i.e.,  
17  
18 attempts to avoid difficult listening situations as well as those to control and suppress the  
19  
20 thoughts and feeling related to hearing disability). A low *avoidance and suppression* score  
21  
22 indicates more avoidance and suppression because the items are reverse scored. Cronbach's  
23  
24  $\alpha$ s were 0.90, 0.82, and 0.86 for Factors 1, 2, and the overall HDAQ, showing acceptable  
25  
26 internal consistency.<sup>44</sup> The correlation between the factors was  $r(90)=0.51, p<0.001$ , which  
27  
28 suggests that the two subscales were distinguishable but related.  
29  
30  
31  
32

33  
34 **[Insert Table 2 near here]**  
35  
36  
37

38  
39 Furthermore, we performed a PCA on the split sample to test for generalisability (i.e., split-  
40  
41 sample validation). The sample of 90 was randomly divided into two groups of 45. The PCA  
42  
43 for the first split sample of 45 on 12 items resulted in a three-factor model with cross  
44  
45 loadings. However, the PCA with 7 items (after the removal of the items with cross loadings)  
46  
47 resulted in a two-factor structure that explained 76.41% of the variance without cross  
48  
49 loadings. A PCA was also performed on the second split sample of 45 that also resulted in a  
50  
51 two-factor structure that explained 75.93% of the variance without cross loadings. The results  
52  
53 from both the split samples and the total sample were in close agreement (see Table 3),  
54  
55 strongly supporting the two-factor model.  
56  
57  
58  
59  
60

1  
2  
3  
4  
5  
6  
7  
8  
9  
10  
11  
12  
13  
14  
15  
16  
17  
18  
19  
20  
21  
22  
23  
24  
25  
26  
27  
28  
29  
30  
31  
32  
33  
34  
35  
36  
37  
38  
39  
40  
41  
42  
43  
44  
45  
46  
47  
48  
49  
50  
51  
52  
53  
54  
55  
56  
57  
58  
59  
60

[Insert Table 3 near here]

### *Correlations Between the HDAQ and Other Scales*

Table 4 shows the Pearson's correlation coefficients between the HDAQ and other scales. The two HDAQ subscales were moderately associated with each other and strongly associated with the full scale. The results revealed the following significant correlations: a moderately strong negative correlation between acceptance and hearing disability; a moderately negative correlation between acceptance and symptoms of anxiety and depression; and a weak negative correlation between acceptance and readiness to change. These results suggest that those people higher hearing disability acceptance had less self-reported hearing disability, fewer self-reported symptoms of anxiety and depression, and lower readiness to change. In addition, a weak positive correlation was found between self-reported hearing disability and self-reported symptoms of anxiety and depression, which indicates that people with higher self-reported hearing disability are likely to have higher self-reported symptoms of anxiety and depression. Although differences were observed, the relationships between the individual subscales and other factors (i.e., hearing disability, symptoms of anxiety and depression, and readiness to change) did not differ much compared with the full HDAQ scale.

[Insert Table 4 near here]

### **Discussion**

Recent research has indicated the utility of psychological acceptance with regard to reducing the impact of chronic health conditions.<sup>29, 48-50</sup> The current paper is the first known attempt to extend this concept to hearing disabilities. After the necessary psychometrical modifications, a two-factor structure emerged for the HDAQ that was in line with the TAQ<sup>30</sup> and similar

1  
2  
3 self-report measures related to acceptance.<sup>51</sup> Its internal consistency was equal to that of the  
4  
5 most commonly used general acceptance scale, the AAQ-I.<sup>52</sup> However, research on an  
6  
7 updated version of this scale rejected a two-factor structure with regard to measuring  
8  
9 acceptance; rather, it suggested a unidimensional structure for the AAQ-II.<sup>53</sup> Our study did  
10  
11 not reveal a single-factor structure for the HDAQ. The first factor, *activity engagement*, was  
12  
13 assumed to reflect whether participants maintain a desired level of activity despite facing  
14  
15 obstacles. For example, a low level of activity engagement might be observed in a person  
16  
17 who stops dining with his or her friends at restaurants because they fear they might not be  
18  
19 able to follow the conversation. The other factor, *avoidance and suppression*, is the  
20  
21 unwillingness to experience events due to their related emotional distress. This concept is the  
22  
23 opposite of acceptance.<sup>54</sup>  
24  
25  
26  
27  
28

29  
30 The HDAQ items were taken from the scale used to study acceptance in people with tinnitus,  
31  
32 which, in turn, was based on the AAQ and CPAQ-R. Although differences most likely exist  
33  
34 with regard to how people cope with tinnitus and hearing disability, similarities are found in  
35  
36 terms of how people cope with general chronic conditions. Acceptance is likely a key  
37  
38 component of adjusting to a disabling condition.<sup>20</sup> Thus, the study of acceptance in various  
39  
40 chronic conditions including hearing disability using the general framework applied in  
41  
42 ‘contextual psychology’ is valuable to both researchers and clinicians.  
43  
44  
45  
46

47  
48 The study results indicate that less acceptance was associated with increased emotional  
49  
50 distress. The relationship between the HDAQ and the HADS is interesting when compared  
51  
52 with similar studies that have indicated the pivotal role of acceptance with regard to  
53  
54 suffering. For instance, McCracken<sup>55</sup> found that acceptance was a stronger predictor of  
55  
56 psychosocial disability among patients with chronic pain than the degree of pain they  
57  
58  
59  
60

1  
2  
3 experienced. Numerous other studies have also found that greater acceptance is related to  
4  
5 psychological well-being (for a summary, see the review by Ruiz<sup>56</sup>). In the present study,  
6  
7 greater acceptance was correlated with a more modest rating of hearing problems; therefore,  
8  
9 it might be analogous to the aforementioned findings regarding pain. Moreover, a recent  
10  
11 systematic review showed that self-reported hearing disability is a robust predictor of hearing  
12  
13 help-seeking, hearing aid acquisition, hearing aid use, and satisfaction with hearing  
14  
15 rehabilitation,<sup>17</sup> which suggests that self-reported hearing disability is an important factor in  
16  
17 the processes of accepting hearing loss and seeking appropriate interventions. Furthermore,  
18  
19 symptoms of depression and anxiety were elevated among those who scored higher on the  
20  
21 HHQ, which illustrates the far-reaching consequences that hearing loss might have. The  
22  
23 relationship between the HDAQ and readiness to change was negative and significant, which  
24  
25 implies that those who were more accepting of their current status were less prone to seek a  
26  
27 change in their current situation. The association between the HDAQ subscales and other  
28  
29 factors did not differ much. This finding might be because both subscales were found to have  
30  
31 strong associations with the full scale and moderate associations with each other.  
32  
33  
34  
35  
36  
37

38 Interestingly, although participants did not use hearing aids, two-thirds of the sample had  
39  
40 consulted hearing specialists on at least one occasion. The reasons for these consultations are  
41  
42 likely to include: (1) acceptance of their condition (i.e., hearing disability); (2) a dilemma  
43  
44 regarding whether they had the condition and a desire to confirm this supposition with  
45  
46 clinicians; or (3) urging from their social partners. Although the reasons for not accepting  
47  
48 intervention (e.g., hearing aids) are not clear, they might be related to the perceived  
49  
50 seriousness of their hearing problems. Previous research suggests that a linear relationship  
51  
52 does not exist between hearing disability and its effects on activities and participation,<sup>8 57</sup>  
53  
54 which might help explain why not all people with hearing disabilities seek interventions.  
55  
56  
57  
58  
59  
60

1  
2  
3 Thus, studying hearing disability acceptance in psychological terms is important.

4  
5 Importantly, becoming suspicious or aware of a hearing disability does not mean that PHI  
6  
7 perceive their difficulties as significant enough to affect their communication and quality of  
8  
9 life. This gap between awareness and action is something that clinicians must be aware of  
10  
11 when they plan and recommend interventions, especially for patients coming to the hearing  
12  
13 clinic for the first time. In addition, much work is needed to understand how hearing  
14  
15 disability acceptance either facilitates or hinders the journey through this condition.  
16  
17  
18  
19

### 20 21 ***Study Limitations***

22  
23 Although the current study focused on an important area of limited research, it nevertheless  
24  
25 has certain limitations. Acceptance with regard to hearing disability is not well defined, and  
26  
27 this scale might only focus on certain components of acceptance (i.e., psychological  
28  
29 acceptance). This limitation might partially explain why people with greater acceptance show  
30  
31 less readiness to change. However, this component is important to understand because it  
32  
33 might explain why many people who are aware of their hearing disability continue to refrain  
34  
35 from seeking professional help and appropriate interventions. Due to the online recruitment  
36  
37 method, the sample might not represent the general population, and caution must be used in  
38  
39 generalising the results.<sup>58-59</sup> Moreover, the relatively small sample size was surprising, given  
40  
41 that the advertisement was published in a national newspaper. The smaller sample size might  
42  
43 also be a limitation of this study. Validating this scale with a larger population is necessary,  
44  
45 although the split-sample validation strongly supported the two-factor model. The online  
46  
47 format of the questionnaire might differ from a pen-and-paper format, although web-based  
48  
49 questionnaires have been found to be reliable and valid.<sup>60-61</sup> The study results are only  
50  
51 relevant with regard to participants who experience hearing difficulties rather than typical  
52  
53 participants in clinical situations, although there might be some overlap because nearly two-  
54  
55  
56  
57  
58  
59  
60

1  
2  
3 thirds of the current sample had previously consulted hearing specialists. Although indirect  
4 coping measures exist, no well-established acceptance scale examines the concurrent validity  
5 of the HDAQ using acceptance. Studying the associations between *acceptance* and other  
6 factors such as *cognitive functions, personality, quality of life, and psychological well-being*  
7 would have been interesting and useful; however, these factors were not included in the  
8 current study. Furthermore, the predictive validity of the scale must be explored.  
9  
10  
11  
12  
13  
14  
15  
16  
17  
18

## 19 **Conclusions**

20  
21 In summary, our results suggest that additional exploration of the potential role that  
22 acceptance plays in the process of adjusting to hearing problems would be a fruitful  
23 endeavour, particularly with regard to understanding the role that acceptance plays in the  
24 journey of PHI. However, much work remains to be done. Specifically, a coherent theoretical  
25 framework is needed to account for what role, if any, acceptance plays with regard to  
26 adjusting to hearing problems. One cannot take for granted the fact that the successful  
27 management of other conditions, which all entails painful experiences (e.g., tinnitus, chronic  
28 pain, and anxiety), are relevant to hearing disability, which instead is characterised by the  
29 loss of (auditory) experiences. In addition, future research must examine the longitudinal  
30 stability of acceptance and its relevance to objective measures of hearing disability as well as  
31 the utility of the current structure of the HDAQ and whether it can successfully alleviate the  
32 suffering usually associated with hearing disability.  
33  
34  
35  
36  
37  
38  
39  
40  
41  
42  
43  
44  
45  
46  
47  
48  
49  
50  
51  
52  
53  
54  
55  
56  
57  
58  
59  
60

## Acknowledgements

We thank Alexander Alasjö for his help with applying the online questionnaires and Ariane Laplante-Lévesque for providing us with the revised version of the URICA scale used in this study. This study was a part of the doctoral study of the first author, and portions of this manuscript were presented as a doctoral thesis.

## Contributors

VM contributed to most of the work including data collection, analysis, and writing; PM contributed to the writing; JR contributed to study design and writing; GA contributed to study design and writing; and TL contributed to study design and writing.

## Funding

Grants from the Swedish Council for Working Life and Social Research 2009-0055 as well as the Swedish Research Council 2007-8654 partially funded this research.

## Ethical Approval

Ethical approval was received from the Research Ethics Committee, College of Human and Health Sciences, Swansea University.

## Data Sharing

No additional data are available.

## Conflict of interests

None.

## References

1. Stephens D, Kramer S.E. *Living with Hearing Difficulties: The Process of Enablement*. Chichester: Wiley, 2009.
2. Edgett LMD. *Help-seeking for advanced rehabilitation by adults with hearing loss: an ecological model*. PhD Thesis. University of British Columbia, Vancouver, Canada, 2002.
3. Engelund G. *Time for hearing – recognising process for the individual*. PhD Thesis. University of Copenhagen, Eriksholm, Denmark, 2006.
4. Manchaiah VKC, Stephens D, Meredith R. The patient journey of adults with hearing impairment: the patients' view. *Clin Otol* 2011;36:227-234.
5. Manchaiah VKC, Stephens D. The Patient journey: Living with hearing impairment. *J Acad Rehab Audiol* 2011;44:29-40.
6. Davis A, Smith P, Ferguson M, *et al*. Acceptability, benefit and costs of early screening for hearing disability: A study of potential screening tests and models. *Health Tech Assess* 2007;11:1-294.
7. Manchaiah VKC, Danermark B, Rönnerberg J, *et al*. Importance of 'process evaluation': Examples from studies on hearing impairment. Submitted
8. Carson AJ. "What brings you here today?" The role of self-assessment in help-seeking for age-related hearing loss. *J Aging Stud* 2005;19:185-200.
9. Martin FN, Krall L, O'Neal J. The diagnosis of acquired hearing loss. *ASHA* 1989;31:47-50.
10. Light KJ, Looi V. Reactions to the diagnosis of a progressive hearing loss in adults. *J Acad Rehab Audiol* 2011;84:53-84.
11. Meyer C, Hickson L, Khan A, *et al*. Investigations of the actions taken by adults who failed a telephone-based hearing screen. *Ear Hear* 2011;32(6):720-731.



- 1  
2  
3 12. Brookes DN. The effect of attitude on benefit obtained from hearing aids. *Brit J*  
4  
5 *Audiol* 1989;23:3-11.  
6
- 7  
8 13. Jerram JCK, Purdy SC. Technology, expectations, and adjustment to of hearing loss:  
9  
10 Predictors of hearing aid outcome. *J Am Acad Audiol* 2001;12:64-79.  
11
- 12 14. Hallberg L, Carlsson S. A qualitative study of strategies for managing a hearing  
13  
14 impairment. *Brit J Audiol* 1991;25:201-211.  
15
- 16 15. Andersson G, Melin L, Lindberg P, *et al.* Development of a short scale for self-  
17  
18 assessment of experiences of hearing impairment: The Hearing Coping  
19  
20 Assessment. *Scand Audiol* 1995;24:147-154.  
21
- 22 16. Andersson G, Melin L, Lindberg P, *et al.* Elderly hearing impaired persons' coping  
23  
24 behavior. *Int J Behav Med* 1996;3:303-320.  
25
- 26 17. Knudsen LV, Oberg M, Nielsen C, *et al.* Factor influencing help seeking, hearing aid  
27  
28 uptake, hearing aid use and satisfaction with hearing aids: A review of the literature.  
29  
30 *Trends Amplif* 2010;14(3):127-154.  
31
- 32 18. Hayes SC, Strosahl KD, Wilson KG. *Acceptance and commitment therapy an*  
33  
34 *experiential approach to behavior change*. New York: The Guilford Press, 1999.  
35  
36
- 37 19. Wentzel KR, Caldwell, K. Friendships, peer acceptance, and group membership:  
38  
39 relations to academic achievement in middle school. *Child Dev* 1997;68(6):1198–209.  
40  
41
- 42 20. Li L, Moore D. Acceptance of disability and its correlates. *J Soc Psychol*  
43  
44 1998;138:13–25.  
45
- 46 21. Stuijbergen A, Becker H, Blozis S, *et al.* Conceptualization and development of the  
47  
48 chronic health conditions scale. *Issues Ment Health Nurs* 2008;29(2):101-114.  
49
- 50 22. Andersson G, Willebrand M. What is coping? A critical review of the construct and  
51  
52 its application in audiology. *Int J Audiol* 2003;42:S97-S103.  
53  
54  
55  
56  
57  
58  
59  
60

- 1  
2  
3 23. Karekla M, Panayiotou G. Coping and experiential avoidance: Unique or overlapping  
4 constructs?. *J Behav Ther Exp Psy* 2011;42:163-170.  
5  
6  
7 24. Goffman E. *Stigma: Notes on management of spoiled identity*. Englewood Cliffs, NJ:  
8 Prentice Hall, 1963.  
9  
10  
11 25. Héту R. The stigma attached to hearing impairment. *Scand Audiol*  
12 1996;25(Suppl.43):12-24.  
13  
14  
15 26. Danermark B, Gellerstedt LC. Hearing Impairment, Psychosocial Work Environment  
16 and Health. *Int J Audiol* 2004;43:383-389.  
17  
18  
19  
20 27. Linkowski DC. A scale to measure acceptance of disability. *Rehab Couns Bull*  
21 1971;14:236-244.  
22  
23  
24 28. McCracken LM, Vowles KE, Eccleston C. Acceptance of chronic pain: component  
25 analysis and revised assessment method. *Pain* 2004;107:159-166.  
26  
27  
28 29. McCracken LM, Vowles KE. Acceptance of chronic pain. *Curr Pain Headache Rep*  
29 2006;10(2):90-94.  
30  
31  
32  
33 30. Westin V, Hayes SC, Andersson G. Is it the sound or your relationship to it? The role  
34 of acceptance in predicting tinnitus impact. *Behav Res Ther* 2008;46:1259-1265.  
35  
36  
37 31. Demorset ME, Erdman SA. Development of the communication profile for the  
38 hearing impaired. *J Speech Lang Hear Res* 1987;52:129-143.  
39  
40  
41  
42 32. Gomez RG, Mandey SF. Coping-with-hearing-loss model for older adults. *Journal*  
43 *of Gerontology: Psychological Sciences* 2001;56B:223-225.  
44  
45  
46 33. Manchaiah VKC, Stephens D, Andersson G, *et al*. Use of the 'patient journey' model  
47 in the internet-based pre-fitting counseling of a person with hearing disability: Study  
48 protocol for a randomized controlled trial. *Trials* 2013;14(1):25.  
49  
50  
51  
52  
53  
54  
55  
56  
57  
58  
59  
60

- 1  
2  
3 34. Manchaiah VKC, Rönnerberg J, Andersson G, *et al.* Use of the ‘patient journey’ model  
4  
5 in the internet-based pre-fitting counseling of a person with hearing disability:  
6  
7 Lessons from a failed clinical trial. Submitted.  
8  
9  
10 35. Hayes SC, Strosahl KD, Wilson KG, *et al.* Measuring experiential avoidance: A  
11  
12 preliminary test of a working model. *Psychol Rec* 2004;54:553-578.  
13  
14 36. Noble W, Tyler R, Dunn C, *et al.* Hearing handicap ratings among different profiles  
15  
16 of adult cochlear implant users. *Ear Hear* 2008;29(1):112–120.  
17  
18 37. Herrmann C. International experience with the hospital anxiety and depression scale -  
19  
20 a review of validation data and clinical results. *J Psychosom Res* 1997;42(1):17–41.  
21  
22 38. Zigmond AS, Snaith RP. The hospital anxiety and depression scale. *Acta Psychiatr*  
23  
24 *Scand* 1983;67(6):361-370.  
25  
26  
27 39. Andersson G, Kaldo-Sandström V, Ström L, *et al.* Internet administration of the  
28  
29 Hospital Anxiety and Depression Scale (HADS) in a sample of tinnitus patients. *J*  
30  
31 *Psychosom Res* 2003;55:259-262.  
32  
33  
34 40. McConaughy EN, Prochaska JO, Velicer WF. Stages of change in psychotherapy:  
35  
36 measurement and sample profiles. *Psychother Theor Res Prac* 1983;20:368–375.  
37  
38  
39 41. DiClemente CC, Prochaska J. Toward a comprehensive, transtheoretical model of  
40  
41 change. Miller & Heather (eds.) *Treating Addictive Behaviors: Second Edition*. New  
42  
43 York: Plenum Press, 1989, pp. 3–24.  
44  
45 42. Laplante-Lévesque A, Hickson L, Worrall L. Stages of change in adults with acquired  
46  
47 hearing impairment seeking help for the first time: application of the transtheoretical  
48  
49 model in audiologic rehabilitation. *Ear Hear* 2013;34(4):447-457.  
50  
51  
52 43. Kline P. *An easy guide to factor analysis*. London: Routledge, 1994.  
53  
54  
55  
56  
57  
58  
59  
60

- 1  
2  
3  
4  
5  
6  
7  
8  
9  
10  
11  
12  
13  
14  
15  
16  
17  
18  
19  
20  
21  
22  
23  
24  
25  
26  
27  
28  
29  
30  
31  
32  
33  
34  
35  
36  
37  
38  
39  
40  
41  
42  
43  
44  
45  
46  
47  
48  
49  
50  
51  
52  
53  
54  
55  
56  
57  
58  
59  
60
44. Garson GD. Reliability analysis statnotes: Topics in multivariate analysis.  
<http://faculty.chass.ncsu.edu/garson/PA765/reliability.htm> (accessed 17 December 2012).
45. Kaiser HF. The applications of electronic computers to factor analysis. *Edu Psychol Meas* 1960;20:141-151.
46. Cattell RB. The scree test for the number of factors. *Multivar Behav Res* 1966;1:245-276.
47. Costello AB, Osborne JW. Best practice in exploratory factor analysis: Four recommendations for getting the most from your analysis. *Practical assessment, Research & Evaluation* 2005;10(7):1-9. Available online:  
<http://pareonline.net/pdf/v10n7.pdf>
48. Westin VZ, Schulin M, Hesser H, *et al.* Acceptance and commitment therapy versus tinnitus retraining therapy in the treatment of tinnitus: a randomised controlled trial. *Behav Res Ther* 2011;49(11):737-747.
49. Hesser H, Gustafsson T, Lundén C, *et al.* A randomized controlled trial of Internet-delivered cognitive behavior therapy and acceptance and commitment therapy in the treatment of tinnitus. *J Consult Clin Psychol* 2012;80(4):649-61.
50. Hayes SC, Villatte M, Levin M, *et al.* Open, aware, and active: contextual approaches as an emerging trend in the behavioral and cognitive therapies. *Annu Rev Clin Psychol* 2011;7:141-68.
51. Bond FW, Bunce D. The role of acceptance and job control in mental health, job satisfaction, and work performance. *J Appl Psychol* 2003;88:1057-1067.
52. Hayes SC, Stroschal K, Wilson KG, *et al.* Measuring experiential avoidance: a preliminary test of a working model. *Psychol Rec* 2004;54:553-578.

- 1  
2  
3 53. Bond FW, Lloyd J, Guenole N. The work-related acceptance and action questionnaire  
4  
5 (WAAQ): Initial psychometric findings and their implications for measuring  
6  
7 psychological flexibility in specific contexts. *J Occup Organ Psychol* 2012;1-25.  
8  
9  
10 54. Hayes SC, Strosahl KD, Wilson KG. *Acceptance and commitment therapy: The*  
11  
12 *process and practice of mindful change (2nd ed.)*. New York: Guilford Press, 2012.  
13  
14 55. McCracken LM. Learning to live with the pain: acceptance of pain predicts  
15  
16 adjustment in persons with chronic pain. *Pain* 1998;74:21-27.  
17  
18 56. Ruiz FJ. A Review of Acceptance and Commitment Therapy (ACT) Empirical  
19  
20 Evidence: Correlational, Experimental Psychopathology, Component and Outcome  
21  
22 Studies. *Int J Psych Psychol Ther* 2010;10(1):125-162.  
23  
24 57. Swan IRC, Gatehouse S. Factors influencing consultation for management of hearing  
25  
26 disability. *Brit J Audiol* 1990;24:155-160.  
27  
28 58. Whitehead LC. Methodological and ethical issues in internet-mediated research in the  
29  
30 field of health: an integrated review of the literature. *Soc Sci Med* 2007;65:782-791.  
31  
32 59. Glasgow RE, Nelson CC, Kearney KA. Reach, engagement, and retention in an  
33  
34 internet-based weight loss program in a multi-site randomized controlled trial. *J Med*  
35  
36 *Internet Res* 2007;9:e11, doi:10.2196/jmir.9.2.e11.  
37  
38 60. Thorén E, Andersson G, Lunner T. The use of research questionnaires in hearing  
39  
40 impaired adults: Online vs paper-and-pencil administration. *BMC Ear Nose Throat*  
41  
42 *Disord* 2012;12(1):1-12.  
43  
44 61. Buchanan T. Online assessment: Desirable or dangerous?. *Prof Psychol-Res Pr*  
45  
46 2002;33:148-154.  
47  
48  
49  
50  
51  
52  
53  
54  
55  
56  
57  
58  
59  
60

## Tables

**Table 1. Participants demographics**

|                                                                                                       |             |
|-------------------------------------------------------------------------------------------------------|-------------|
| <b>Age in years (M±SD)</b>                                                                            | 63.41±10.49 |
| <b>Gender (% male)</b>                                                                                | 50          |
| <b>Duration of hearing difficulties in years (M±SD)</b>                                               | 11.67±10.83 |
| <b>Consulted a healthcare professional specialising in hearing regarding hearing difficulties (%)</b> |             |
| ▪ Yes                                                                                                 | 65.6        |
| ▪ No                                                                                                  | 34.4        |
| <b>Education (%)</b>                                                                                  |             |
| ▪ Compulsory education                                                                                | 13.3        |
| ▪ Secondary education                                                                                 | 48.9        |
| ▪ Tertiary education                                                                                  | 37.8        |
| <b>Self-reported hearing disability acceptance (HDAQ; M±SD)</b>                                       | 36.88±7.85  |
| ▪ Activity engagement                                                                                 | 22.72±4.36  |
| ▪ Avoidance and suppression                                                                           | 14.16±4.65  |
| <b>Self-reported hearing disability (HHQ; M±SD)</b>                                                   | 34.96±9.95  |
| ▪ Emotional                                                                                           | 20.61±5.75  |
| ▪ Social                                                                                              | 14.32±4.85  |
| <b>Self-reported anxiety and depression (HADS; M±SD)</b>                                              | 14.77±7.50  |
| ▪ Anxiety                                                                                             | 7.04±4.43   |
| ▪ Depression                                                                                          | 7.70±3.81   |
| <b>Stages of change (URICA)</b>                                                                       |             |
| Readiness-to-change composite (M±SD)                                                                  | 39.41±8.63  |

Table 2. HDAQ principle components analysis (n=90)

| Scale:<br>7-item HDAQ                                                                        | Factor 1:<br>Activity<br>engagement | Factor 2:<br>Avoidance and<br>suppression |
|----------------------------------------------------------------------------------------------|-------------------------------------|-------------------------------------------|
| 1. I am leading a full life, even though I have a hearing problem                            | 0.854                               |                                           |
| 2. My life is going well, even though I have a hearing problem                               | 0.891                               |                                           |
| 3. Despite hearing problem, I can draw up and stick to a certain course in my life           | 0.857                               |                                           |
| 4. When my hearing problem increases, I can still take care of my responsibilities           | 0.763                               |                                           |
| 5. My hearing problem leads me to avoid certain situations                                   |                                     | 0.885                                     |
| 6. My hearing problem changes me as a person                                                 |                                     | 0.862                                     |
| 7. I spend a lot of time thinking about how things would be for me without a hearing problem |                                     | 0.734                                     |
| <b>Cronbach's <math>\alpha</math></b>                                                        | 0.90                                | 0.82                                      |
| <b>Percentage of variance</b>                                                                | 42.94                               | 32.75                                     |
| <b>Eigenvalue</b>                                                                            | 3.0                                 | 2.29                                      |

Table 3. Split-sample validation for the seven-item HDAQ

|                                         | Full sample<br>(n=90) | Split sample 1<br>(n=45) | Split sample 2<br>(n=45) |
|-----------------------------------------|-----------------------|--------------------------|--------------------------|
| <b>Percentage of variance explained</b> |                       |                          |                          |
| ▪ Factor 1: Activity engagement         | 42.94                 | 43.48                    | 44.13                    |
| ▪ Factor 2: Avoidance and suppression   | 32.75                 | 32.93                    | 31.80                    |
| ▪ Combined                              | 75.69                 | 76.41                    | 75.93                    |
| <b>Eigenvalue</b>                       |                       |                          |                          |
| ▪ Factor 1: Activity engagement         | 3.0                   | 3.0                      | 3.0                      |
| ▪ Factor 2: Avoidance and suppression   | 2.29                  | 2.3                      | 2.2                      |
| <b>Cronbach's <math>\alpha</math></b>   |                       |                          |                          |
| ▪ Factor 1: Activity engagement         | 0.90                  | 0.83                     | 0.82                     |
| ▪ Factor 2: Avoidance and suppression   | 0.82                  | 0.89                     | 0.90                     |
| ▪ Combined                              | 0.86                  | 0.88                     | 0.86                     |



Table 4. Correlations between different scales (\* = p&lt;0.01)

|                                                           | HDAQ   | HDAQ<br>- 1 | HDAQ<br>- 2 | HHQ   | HADS | URICA-R |
|-----------------------------------------------------------|--------|-------------|-------------|-------|------|---------|
| <b>Self-reported hearing disability acceptance (HDAQ)</b> | 1.00   |             |             |       |      |         |
| <b>HDAQ Factor 1: Activity engagement</b>                 | 0.86*  | 1.00        |             |       |      |         |
| <b>HDAQ Factor 2: Avoidance and suppression</b>           | 0.88*  | 0.51*       | 1.00        |       |      |         |
| <b>Self-reported hearing disability (HHQ)</b>             | -0.70* | -0.50*      | -0.71*      | 1.00  |      |         |
| <b>Self-reported anxiety and depression (HADS)</b>        | -0.58* | -0.62*      | -0.39*      | 0.36* | 1.00 |         |
| <b>Readiness to change (URICA-R)</b>                      | -0.27* | -0.26*      | -0.29*      | 0.20  | 0.18 | 1.00    |

# The acceptance of hearing disability among adults experiencing hearing difficulties

Vinaya K. C. Manchaiah<sup>1,2</sup>, Peter Molander<sup>2</sup>, Jerker Rönnerberg<sup>2</sup>, Gerhard Andersson<sup>2,3</sup> and Thomas Lunner<sup>3,4</sup>

1. Department of Vision and Hearing Sciences, Anglia Ruskin University, Cambridge CB1 1PT, United Kingdom
2. Linnaeus Centre HEAD, Swedish Institute for Disability Research, Department of Behavioural Science and Learning, Linköping University, SE-58183, Linköping, Sweden
3. Department of Clinical Neuroscience, Division of Psychiatry, Karolinska Institutet, SE-17177, Stockholm, Sweden
4. Eriksholm Research Centre, Oticon A/S, 20 Rørtangevej, DK-3070 Snekkersten, Denmark

**Corresponding author** Dr. Vinaya K. C. Manchaiah

**Address** Department of Vision and Hearing Sciences,  
Coslett 204, Faculty of Science and Technology,  
Anglia Ruskin University  
Cambridge CB1 1PT  
United Kingdom

**E-mail** [vinaya.manchaiah@anglia.ac.uk](mailto:vinaya.manchaiah@anglia.ac.uk)

**Tel** +44 (0)1223 698653

**Fax** +44 (0)1223 695056

## Abstract

**Objective:** This study developed the Hearing Disability Acceptance Questionnaire (HDAQ) and tested its construct and concurrent validities. **Design:** Cross-sectional. **Participants:** A total of 90 participants who were experiencing hearing difficulties were recruited in the UK. **Outcome Measures:** The HDAQ was developed based on the Tinnitus Acceptance Questionnaire (TAQ). Participants completed self-report measures regarding hearing disability acceptance, hearing disability, symptoms of anxiety and depression, and a measure of stages of change. **Results:** The HDAQ has a two-factor structure that explains 75.69% of its variance. The factors identified were *activity engagement* and *avoidance and suppression*. The scale showed sufficient internal consistency (Cronbach's  $\alpha=0.86$ ). The HDAQ also had acceptable concurrent validity with regard to self-reported hearing disability, self-reported anxiety and depression, and readiness to change measures. **Conclusions:** Acceptance is likely an important aspect of coping with chronic health conditions. To our knowledge, no previously published and validated scale measures the acceptance of hearing disability; therefore, the HDAQ might be useful in future research. However, the role of acceptance in adjusting to hearing disability must be further investigated.

## Keywords

Hearing disability, hearing loss, acceptance, self-reported measure

## Summary

### Article Focus

- To develop the Hearing Disability Acceptance Questionnaire (HDAQ) and study its construct and concurrent validities.

### Key Message

- The results suggest that the HDAQ has a two-factor structure that explains 75.69% of its variance. The scale showed sufficient internal consistency (Cronbach's  $\alpha=0.86$ ).
- The results revealed the following significant correlations: a moderately strong negative correlation between acceptance and hearing disability; a moderately negative correlation between acceptance and symptoms of anxiety and depression; and a weak negative correlation between acceptance and readiness to change.
- The role of acceptance in adjusting to hearing disability must be further investigated.

### Strengths and Weaknesses

- Due to its online recruitment, the sample might not represent the general population. In addition, the online questionnaire might differ from a pen-and-paper format in terms of data quality.
- Although there are measures that study coping indirectly, no well-established acceptance scale examines the concurrent validity of the HDAQ using the same construct (i.e., acceptance).

## Introduction

An individual with hearing loss might pass through several stages when help-seeking.<sup>1</sup> Edgett<sup>2</sup> emphasised that the decision-making process to seek help involves four major stages: (1) understanding hearing loss; (2) personal experience; (3) interactions with society; and (4) taking action. In another study, Engelund<sup>3</sup> suggested that patients proceed through four major stages while making a decision to seek help: (1) attracting attention; (2) becoming suspicious; (3) sensing tribulation; and (4) jeopardising the fundamental self. In our previous studies of the “patient’s journey” regarding people with hearing impairment (PHI), we took this idea further and studied this journey from the initial onset of problems through successful rehabilitation, thereby developing a patient journey model.<sup>4-5</sup> This model suggests that PHI experience seven major stages before, during, and after their audiological rehabilitation: (1) pre-awareness; (2) awareness; (3) movement; (4) diagnostics; (5) rehabilitation; (6) self-evaluation; and (7) resolution. On average, PHI can take 10 years or more to seek help after first noticing hearing difficulties; hence, this process might take many years.<sup>6</sup> Although additional research is necessary to better understand this process,<sup>7</sup> these previous studies nevertheless provide insight regarding the stages of adjusting to hearing loss, which might be an indirect (or secondary) indicator of the process of acceptance. In addition, it is clear from the aforementioned studies that becoming aware of and accepting a hearing disability play important roles in further progressing in their journey to manage their condition.

A few studies in the audiology literature have focused on the self-assessment of hearing loss,<sup>8</sup> immediate reactions to the diagnosis of hearing loss,<sup>9-10</sup> actions taken after failing screening tests,<sup>11</sup> attitudes toward hearing loss and the use of hearing aids,<sup>12-13</sup> and the ways in which PHI cope with their condition.<sup>14-16</sup> These studies provide further insights into the initial onset of the condition and how PHI manage their condition. A recent literature review suggested

1  
2  
3 that the acceptance of hearing loss prior to hearing aid fitting positively influences both  
4 hearing aid acquisition and subsequent hearing aid use.<sup>17</sup> However, numerous PHI who are  
5 aware that they have a problem but continue not to seeking help, use intervention strategies,  
6 or both remain. The literature can be confusing because the term “acceptance” is used  
7 synonymously with treatment/management option adherence, rather than studying this term  
8 using validated scales that capture different dimensions of this construct.  
9  
10  
11  
12  
13  
14  
15  
16  
17

18 In psychological terms, acceptance is *a process of actively taking in thoughts, memories,*  
19 *feelings, and bodily sensations in a specific situation without having to follow or change*  
20 *them.*<sup>18</sup> Acceptance can have various dimensions including self- and social acceptance that  
21 require both emotional and behavioural adaptations. For instance, the different views of what  
22 acceptance actually involves is evident from examining studies of education and academic  
23 success, where the term *peer acceptance* refers to a pupil who is judged to be a desirable  
24 interaction partner.<sup>19</sup> Disability studies have proposed that acceptance is the key component  
25 to adjusting to a disabling condition.<sup>20</sup> Although the acceptance of chronic conditions has  
26 often been studied from the perspectives of grief and loss, studying the acceptance of chronic  
27 conditions with regard to the perspectives of those living with it, with a focus on adaptation  
28 to and accepting change in one’s life, is also important.<sup>21</sup>  
29  
30  
31  
32  
33  
34  
35  
36  
37  
38  
39  
40  
41  
42  
43  
44

45 Experiential avoidance is similar to the concept of avoidance coping and can be defined as  
46 the opposite reaction to acceptance; that is, a person attempts to ignore and minimise the  
47 problems caused by hearing impairment.<sup>22</sup> However, some researchers have argued that  
48 coping and experiential avoidance are unique but overlapping constructs.<sup>23</sup> For example,  
49 although acceptance (i.e., experiential avoidance) loaded on to the same factors as emotion-  
50 focused and avoidant coping in a recent study of anxiety disorders, acceptance explained  
51  
52  
53  
54  
55  
56  
57  
58  
59  
60

1  
2  
3 additional variance when predicting psychological distress and well-being.<sup>23</sup> With regard to  
4  
5 hearing impairment, both acceptance and experiential avoidance can be interpreted in light of  
6  
7 stigma theory,<sup>24</sup> which has previously been applied in hearing impairment research.<sup>25-26</sup>  
8  
9

10  
11 Acceptance, in relation to hearing disability, has not been well defined; often this term is used  
12  
13 to refer to help-seeking behaviour and intervention (e.g., hearing aids) adoption. In effect,  
14  
15 differences exist in terms of the psychological and audiological ways of defining acceptance  
16  
17 with regard to hearing disability. However, various scales examine the acceptance of other  
18  
19 disabilities and chronic conditions.<sup>20-21, 27-30</sup> Past audiology studies have focused on coping;  
20  
21 however, coping is generally measured indirectly via questions related to communication  
22  
23 problems<sup>22</sup> [e.g., the Communication Strategies Subscale (CSS) in the Communication  
24  
25 Profile for the Hearing Impaired (CPHI) questionnaire].<sup>31</sup> The CPHI-CSS focuses on  
26  
27 maladaptive behaviours as well as verbal strategies and non-verbal strategies, and it provides  
28  
29 insight concerning poor adjustment to hearing impairment and poor social support.<sup>32</sup> To our  
30  
31 knowledge, however, no published and validated scale examines the acceptance of hearing  
32  
33 disability.  
34  
35  
36  
37  
38  
39

40  
41 The current study developed a self-report measure of hearing disability acceptance and  
42  
43 investigated its construct and concurrent validities. We focused on the psychological aspects  
44  
45 of acceptance in this study (i.e., experiential avoidance, which is the opposite of acceptance).  
46  
47  
48

## 49 **Method**

### 50 *Study Design and Participants*

51  
52  
53 The current study used cross-sectional data obtained during a clinical trial (i.e., pre-  
54  
55 intervention data) of a pre-fitting counselling program.<sup>33-34</sup> Ethical approval was received  
56  
57  
58  
59  
60

1  
2  
3 from the Research Ethics Committee, College of Human and Health Sciences, Swansea  
4 University. A study advertisement was offered in the UK through various sources including  
5 national newspapers, hearing loss charity websites (i.e., Action on Hearing Loss and Hearing  
6 Link), and local GP practice notice boards, inviting those who were experiencing hearing  
7 difficulties but not using hearing aids to those who had access to the Internet to participate in  
8 this study. Interested participants were encouraged to access the study website using the URL  
9 supplied. A total of 90 participants completed the informed consent form, provided  
10 demographic information, and completed four online questionnaires. These questionnaires  
11 included the Hearing Disability Acceptance Questionnaire (HDAQ), the Hearing Handicap  
12 Questionnaire (HHQ), the Hospital Anxiety and Depression Scale (HADS), and the  
13 University of Rhode Island Change Assessment (URICA) Scale.  
14  
15  
16  
17  
18  
19  
20  
21  
22  
23  
24  
25  
26  
27  
28  
29

### 30 ***Development of the HDAQ***

31 The HDAQ was developed based on the Tinnitus Acceptance Questionnaire (TAQ), which  
32 was developed in Sweden to study tinnitus acceptance.<sup>30</sup> The TAQ was based on the  
33 Acceptance and Action Questionnaire (AAQ),<sup>35</sup> and the Chronic Pain Acceptance  
34 Questionnaire-Revised (CPAQ-R);<sup>28</sup> some additional questions were included. The 12-item  
35 TAQ has two factors (*activity engagement* and *tinnitus suppression*), and it has sufficient  
36 internal consistency (Cronbach's  $\alpha=0.89$ ).<sup>30</sup> Like the TAQ, the HDAQ is a measure of  
37 experiential avoidance/acceptance. Its 12 items were taken from the TAQ, and the word  
38 "tinnitus" was replaced with "hearing problem". However, the 12 items were further reduced  
39 to 7 items (see the results section). Each item was rated on a 7-point Likert scale (1=never  
40 true, 7=always true). Total scores ranged from 7 to 49; higher scores indicate greater  
41 acceptance of hearing disability (see Appendix 1).  
42  
43  
44  
45  
46  
47  
48  
49  
50  
51  
52  
53  
54  
55  
56  
57  
58  
59  
60



### *Other Questionnaires*

The HHQ measures personal and social effects (i.e., emotional distress and discomfort, social withdrawal, and general participation restrictions).<sup>36</sup> The 12 questions of the HHQ are scored on a 5-point Likert scale (1=never, 5=almost always). Total scores range from 12 to 60, and higher scores indicate greater disability. The HHQ has acceptable internal consistency, with Cronbach's  $\alpha$  of 0.95 and 0.93 for the emotional and social scales, respectively.

The HADS was used to screen for symptoms of anxiety and depression. The HADS consists of 14 items, divided into two subscales: anxiety and depression.<sup>37</sup> Each item is scored from 0 to 3 (0=not at all, 3=most of the time) with a total score ranging from 0 to 42; higher scores indicate more self-reported anxiety and depressive symptoms. The HADS has acceptable reliability ( $r=.84$ ) and internal consistency ( $\alpha=.83$ ),<sup>38</sup> including Internet administration.<sup>39</sup> In addition, the HADS also has acceptable sensitivity and specificity (AUC=0.80) as indicated in the receiver operator characteristic (ROC) curves.

The URICA measures of stages of change across four subscales: pre-contemplation, contemplation, action, and maintenance.<sup>40-41</sup> The original URICA scale consists of 32 items; however, the current study used a modified version (*the problem* was replaced with *the hearing problem*) consisting of a 24-item scale.<sup>42</sup> Each item was rated on a 5-point Likert scale (1=strong disagreement, 5=strong agreement), and each subscale measured specific aspects. Most study participants were in the early help-seeking stages and had not received interventions for their hearing disabilities; therefore, the eight URICA items regarding maintenance were excluded because they were considered irrelevant for the sample. The total scores of each subscale ranged from 8 to 40. The subscale scores concerning the

1  
2  
3 contemplation and action stages were added, from which the pre-contemplation stage scores  
4  
5 were subtracted to obtain a readiness-to-change composite score (i.e., contemplation + action  
6  
7 – pre-contemplation). A recent study used this modified scale to investigate the use of the  
8  
9 URICA scale among adults with acquired hearing impairments seeking help for the first time.  
10  
11 This scale showed acceptable construct, concurrent, and predictive validities.<sup>42</sup>  
12  
13

### 14 15 16 **Data Analyses**

17  
18 All data analyses were performed using IBM SPSS Version 19 for Windows. Descriptive  
19  
20 statistics were applied to examine demographic factors, and the assumption of normality (i.e.,  
21  
22 Shapiro-Wilk test values of 0.05) was tested before conducting a principal components  
23  
24 analysis (PCA). A PCA was performed to reduce the correlated variables to a smaller set of  
25  
26 important composite variables and examine the factor structure.<sup>43</sup> Cronbach's  $\alpha$  was  
27  
28 calculated to assess the internal consistency of the HDAQ.<sup>44</sup> Pearson's correlations were  
29  
30 performed to examine the association among the following factors: hearing disability  
31  
32 acceptance, self-reported hearing disability, self-reported anxiety and depression, and  
33  
34 readiness to change.  
35  
36  
37  
38  
39  
40

### 41 42 **Results**

43  
44 The data was normally distributed. Table 1 displays the sample characteristics. The average  
45  
46 age of participants and the average duration of hearing disability were 63.41 and 11.67 years,  
47  
48 respectively. The number of males and females in the sample was equal. In addition, nearly  
49  
50 two-thirds of participants had consulted healthcare professionals specialised in hearing (e.g.,  
51  
52 audiologists, hearing aid dispensers, or ENT specialists) at least once.  
53  
54

55 **[Insert Table 1 near here]**  
56  
57

### *HDAQ factor structure*

A PCA with Varimax rotation was performed to examine the factor structure. Eigenvalues were set at 1.0, and the limit for factor loadings was set at .40.<sup>43</sup> The relevant items were reverse scored before analysis. The initial number of factors of interest was determined using Kaiser's rule of eigenvalues greater than 1.0.<sup>45</sup> Subsequently, a scree plot was examined to determine the number of factors to extract.<sup>46</sup>

In the first instance, the PCA resulted in a three-factor model for the 12 items. However, cross loadings were noted for some items (i.e., items that loaded at .40 or above on two or more factors). A PCA was also performed using Direct Oblimin rotation to determine whether these cross loadings were due to the high correlations among items. The Kaiser-Meyer-Olkin (KMO) measure of sampling adequacy was 0.86 with a reference value of 0 to 1.0, and Bartlett's Test of Sphericity was significant [ $\chi^2(66)=370.89, p<.001$ ]. The three factors explained 72.90% of the variance in the 12-item HDAQ. Factor 1 accounted for 49.65% of the variance (with an eigenvalue of 3.40); Factor 2 accounted for 13.95% of the variance (with an eigenvalue of 3.32); and Factor 3 accounted for 9.30% of the variance (with an eigenvalue of 2.01). The Cronbach's  $\alpha$ s were 0.54, 0.50, 0.72, and 0.79 for Factors 1, 2, 3, and the overall 12 items, respectively. The internal consistency of the overall scale was acceptable, although it was not high for Factors 1 and 2.

In the next stage, all items that resulted in cross loadings were removed from the analysis; thus, five items were removed from the original 12-item scale (see Appendix 2 for the removed items). Item reduction (i.e., minimising the set of variables while still accounting for most of the variance) is one of the key goals of PCA. Moreover, removing the items with

1  
2  
3 complex psychometric properties (i.e., cross loadings) can improve the construct validity of  
4 self-report measures.<sup>47</sup> Subsequently, the seven-item HDAQ resulted in a two-factor model  
5  
6 with no cross loading or outliers (see Table 2). The KMO measure of sampling adequacy was  
7  
8 0.82, and Bartlett's Test of Sphericity was significant [ $\chi^2(21)=363.93, p<.001$ ]. These factors  
9  
10 explained 75.69% of the variance in the HDAQ. Factor 1 accounted for 42.94% of the  
11  
12 variance (with an eigenvalue of 3.00), and Factor 2 accounted for 32.75% (with an  
13  
14 eigenvalue of 2.29). The factors were identified as: (1) *activity engagement* (i.e., the pursuit  
15  
16 of life activities regardless of hearing disability) and (2) *avoidance and suppression* (i.e.,  
17  
18 attempts to avoid difficult listening situations as well as those to control and suppress the  
19  
20 thoughts and feeling related to hearing disability). A low *avoidance and suppression* score  
21  
22 indicates more avoidance and suppression because the items are reverse scored. Cronbach's  
23  
24  $\alpha$ s were 0.90, 0.82, and 0.86 for Factors 1, 2, and the overall HDAQ, showing acceptable  
25  
26 internal consistency.<sup>44</sup> The correlation between the factors was  $r(90)=0.51, p<0.001$ , which  
27  
28 suggests that the two subscales were distinguishable but related.  
29  
30  
31  
32

33  
34 **[Insert Table 2 near here]**  
35  
36  
37

38  
39 Furthermore, we performed a PCA on the split sample to test for generalisability (i.e., split-  
40  
41 sample validation). The sample of 90 was randomly divided into two groups of 45. The PCA  
42  
43 for the first split sample of 45 on 12 items resulted in a three-factor model with cross  
44  
45 loadings. However, the PCA with 7 items (after the removal of the items with cross loadings)  
46  
47 resulted in a two-factor structure that explained 76.41% of the variance without cross  
48  
49 loadings. A PCA was also performed on the second split sample of 45 that also resulted in a  
50  
51 two-factor structure that explained 75.93% of the variance without cross loadings. The results  
52  
53 from both the split samples and the total sample were in close agreement (see Table 3),  
54  
55 strongly supporting the two-factor model.  
56  
57  
58  
59  
60

[Insert Table 3 near here]

### *Correlations Between the HDAQ and Other Scales*

Table 4 shows the Pearson's correlation coefficients between the HDAQ and other scales. The two HDAQ subscales were moderately associated with each other and strongly associated with the full scale. The results revealed the following significant correlations: a moderately strong negative correlation between acceptance and hearing disability; a moderately negative correlation between acceptance and symptoms of anxiety and depression; and a weak negative correlation between acceptance and readiness to change. These results suggest that those people higher hearing disability acceptance had less self-reported hearing disability, fewer self-reported symptoms of anxiety and depression, and lower readiness to change. In addition, a weak positive correlation was found between self-reported hearing disability and self-reported symptoms of anxiety and depression, which indicates that people with higher self-reported hearing disability are likely to have higher self-reported symptoms of anxiety and depression. Although differences were observed, the relationships between the individual subscales and other factors (i.e., hearing disability, symptoms of anxiety and depression, and readiness to change) did not differ much compared with the full HDAQ scale.

[Insert Table 4 near here]

## **Discussion**

Recent research has indicated the utility of psychological acceptance with regard to reducing the impact of chronic health conditions.<sup>29, 48-50</sup> The current paper is the first known attempt to extend this concept to hearing disabilities. After the necessary psychometrical modifications, a two-factor structure emerged for the HDAQ that was in line with the TAQ<sup>30</sup> and similar

1  
2  
3 self-report measures related to acceptance.<sup>51</sup> Its internal consistency was equal to that of the  
4  
5 most commonly used general acceptance scale, the AAQ-I.<sup>52</sup> However, research on an  
6  
7 updated version of this scale rejected a two-factor structure with regard to measuring  
8  
9 acceptance; rather, it suggested a unidimensional structure for the AAQ-II.<sup>53</sup> Our study did  
10  
11 not reveal a single-factor structure for the HDAQ. The first factor, *activity engagement*, was  
12  
13 assumed to reflect whether participants maintain a desired level of activity despite facing  
14  
15 obstacles. For example, a low level of activity engagement might be observed in a person  
16  
17 who stops dining with his or her friends at restaurants because they fear they might not be  
18  
19 able to follow the conversation. The other factor, *avoidance and suppression*, is the  
20  
21 unwillingness to experience events due to their related emotional distress. This concept is the  
22  
23 opposite of acceptance.<sup>54</sup>  
24  
25  
26  
27  
28

29  
30 The HDAQ items were taken from the scale used to study acceptance in people with tinnitus,  
31  
32 which, in turn, was based on the AAQ and CPAQ-R. Although differences most likely exist  
33  
34 with regard to how people cope with tinnitus and hearing disability, similarities are found in  
35  
36 terms of how people cope with general chronic conditions. Acceptance is likely a key  
37  
38 component of adjusting to a disabling condition.<sup>20</sup> Thus, the study of acceptance in various  
39  
40 chronic conditions including hearing disability using the general framework applied in  
41  
42 ‘contextual psychology’ is valuable to both researchers and clinicians.  
43  
44  
45  
46

47  
48 The study results indicate that less acceptance was associated with increased emotional  
49  
50 distress. The relationship between the HDAQ and the HADS is interesting when compared  
51  
52 with similar studies that have indicated the pivotal role of acceptance with regard to  
53  
54 suffering. For instance, McCracken<sup>55</sup> found that acceptance was a stronger predictor of  
55  
56 psychosocial disability among patients with chronic pain than the degree of pain they  
57  
58  
59  
60

1  
2  
3 experienced. Numerous other studies have also found that greater acceptance is related to  
4  
5 psychological well-being (for a summary, see the review by Ruiz<sup>56</sup>). In the present study,  
6  
7 greater acceptance was correlated with a more modest rating of hearing problems; therefore,  
8  
9 it might be analogous to the aforementioned findings regarding pain. Moreover, a recent  
10  
11 systematic review showed that self-reported hearing disability is a robust predictor of hearing  
12  
13 help-seeking, hearing aid acquisition, hearing aid use, and satisfaction with hearing  
14  
15 rehabilitation,<sup>17</sup> which suggests that self-reported hearing disability is an important factor in  
16  
17 the processes of accepting hearing loss and seeking appropriate interventions. Furthermore,  
18  
19 symptoms of depression and anxiety were elevated among those who scored higher on the  
20  
21 HHQ, which illustrates the far-reaching consequences that hearing loss might have. The  
22  
23 relationship between the HDAQ and readiness to change was negative and significant, which  
24  
25 implies that those who were more accepting of their current status were less prone to seek a  
26  
27 change in their current situation. The association between the HDAQ subscales and other  
28  
29 factors did not differ much. This finding might be because both subscales were found to have  
30  
31 strong associations with the full scale and moderate associations with each other.  
32  
33  
34  
35  
36  
37

38 Interestingly, although participants did not use hearing aids, two-thirds of the sample had  
39  
40 consulted **hearing specialists** on at least one occasion. The reasons for these consultations are  
41  
42 likely to include: (1) acceptance of their condition (i.e., hearing disability); (2) a dilemma  
43  
44 regarding whether they had the condition and a desire to confirm this supposition with  
45  
46 clinicians; or (3) urging from their social partners. Although the reasons for not accepting  
47  
48 intervention (e.g., hearing aids) are not clear, they might be related to the perceived  
49  
50 seriousness of their hearing problems. Previous research suggests that a linear relationship  
51  
52 does not exist between hearing disability and its effects on activities and participation,<sup>8 57</sup>  
53  
54 which might help explain why not all people with hearing disabilities seek interventions.  
55  
56  
57  
58  
59  
60

1  
2  
3 Thus, studying hearing disability acceptance in psychological terms is important.  
4

5 Importantly, becoming suspicious or aware of a hearing disability does not mean that PHI  
6  
7 perceive their difficulties as significant enough to affect their communication and quality of  
8  
9 life. This gap between awareness and action is something that clinicians must be aware of  
10  
11 when they plan and recommend interventions, especially for patients coming to the hearing  
12  
13 clinic for the first time. In addition, much work is needed to understand how hearing  
14  
15 disability acceptance either facilitates or hinders the journey through this condition.  
16  
17  
18  
19

### 20 21 ***Study Limitations***

22  
23 Although the current study focused on an important area of limited research, it nevertheless  
24  
25 has certain limitations. Acceptance with regard to hearing disability is not well defined, and  
26  
27 this scale might only focus on certain components of acceptance (i.e., psychological  
28  
29 acceptance). This limitation might partially explain why people with greater acceptance show  
30  
31 less readiness to change. However, this component is important to understand because it  
32  
33 might explain why many people who are aware of their hearing disability continue to refrain  
34  
35 from seeking professional help and appropriate interventions. Due to the online recruitment  
36  
37 method, the sample might not represent the general population, and caution must be used in  
38  
39 generalising the results.<sup>58-59</sup> Moreover, the relatively small sample size was surprising, given  
40  
41 that the advertisement was published in a national newspaper. The smaller sample size might  
42  
43 also be a limitation of this study. Validating this scale with a larger population is necessary,  
44  
45 although the split-sample validation strongly supported the two-factor model. The online  
46  
47 format of the questionnaire might differ from a pen-and-paper format, although web-based  
48  
49 questionnaires have been found to be reliable and valid.<sup>60-61</sup> The study results are only  
50  
51 relevant with regard to participants who experience hearing difficulties rather than typical  
52  
53 participants in clinical situations, although there might be some overlap because nearly two-  
54  
55  
56  
57  
58  
59  
60



1  
2  
3 thirds of the current sample had previously consulted hearing specialists. Although indirect  
4 coping measures exist, no well-established acceptance scale examines the concurrent validity  
5 of the HDAQ using acceptance. Studying the associations between *acceptance* and other  
6 factors such as *cognitive functions, personality, quality of life, and psychological well-being*  
7 would have been interesting and useful; however, these factors were not included in the  
8 current study. Furthermore, the predictive validity of the scale must be explored.  
9  
10  
11  
12  
13  
14  
15  
16  
17  
18

## 19 **Conclusions**

20  
21 In summary, our results suggest that additional exploration of the potential role that  
22 acceptance plays in the process of adjusting to hearing problems would be a fruitful  
23 endeavour, particularly with regard to understanding the role that acceptance plays in the  
24 journey of PHI. However, much work remains to be done. Specifically, a coherent theoretical  
25 framework is needed to account for what role, if any, acceptance plays with regard to  
26 adjusting to hearing problems. One cannot take for granted the fact that the successful  
27 management of other conditions, which all entails painful experiences (e.g., tinnitus, chronic  
28 pain, and anxiety), are relevant to hearing disability, which instead is characterised by the  
29 loss of (auditory) experiences. In addition, future research must examine the longitudinal  
30 stability of acceptance and its relevance to objective measures of hearing disability as well as  
31 the utility of the current structure of the HDAQ and whether it can successfully alleviate the  
32 suffering usually associated with hearing disability.  
33  
34  
35  
36  
37  
38  
39  
40  
41  
42  
43  
44  
45  
46  
47  
48  
49

## 50 **Acknowledgements**

51  
52 We thank Alexander Alasjö for his help with applying the online questionnaires and Ariane  
53 Laplante-Lévesque for providing us with the revised version of the URICA scale used in this  
54  
55  
56  
57  
58  
59  
60

1  
2  
3 study. This study was a part of the doctoral study of the first author, and portions of this  
4  
5 manuscript were presented as a doctoral thesis.  
6  
7  
8

### 9 10 **Contributors**

11 VM contributed to most of the work including data collection, analysis, and writing; PM  
12  
13 contributed to the writing; JR contributed to study design and writing; GA contributed to  
14  
15 study design and writing; and TL contributed to study design and writing.  
16  
17  
18

### 19 20 21 **Funding**

22  
23 Grants from the Swedish Council for Working Life and Social Research 2009-0055 as well as  
24  
25 the Swedish Research Council 2007-8654 partially funded this research.  
26  
27  
28

### 29 30 31 **Ethical Approval**

32  
33 Ethical approval was received from the Research Ethics Committee, College of Human and  
34  
35 Health Sciences, Swansea University.  
36  
37  
38

### 39 40 41 **Data Sharing**

42  
43 No additional data are available.  
44  
45  
46

### 47 48 49 **Conflict of interests**

50  
51 None.  
52  
53  
54

### 55 56 57 **References**

1. Stephens D, Kramer S.E. *Living with Hearing Difficulties: The Process of Enablement*. Chichester: Wiley, 2009.
2. Edgett LMD. *Help-seeking for advanced rehabilitation by adults with hearing loss: an ecological model*. PhD Thesis. University of British Columbia, Vancouver, Canada, 2002.
3. Engelund G. *Time for hearing – recognising process for the individual*. PhD Thesis. University of Copenhagen, Eriksholm, Denmark, 2006.
4. Manchaiah VKC, Stephens D, Meredith R. The patient journey of adults with hearing impairment: the patients' view. *Clin Otol* 2011;36:227-234.
5. Manchaiah VKC, Stephens D. The Patient journey: Living with hearing impairment. *J Acad Rehab Audiol* 2011;44:29-40.
6. Davis A, Smith P, Ferguson M, *et al*. Acceptability, benefit and costs of early screening for hearing disability: A study of potential screening tests and models. *Health Tech Assess* 2007;11:1-294.
7. Manchaiah VKC, Danermark B, Rönnerberg J, *et al*. Importance of 'process evaluation': Examples from studies on hearing impairment. Submitted
8. Carson AJ. "What brings you here today?" The role of self-assessment in help-seeking for age-related hearing loss. *J Aging Stud* 2005;19:185-200.
9. Martin FN, Krall L, O'Neal J. The diagnosis of acquired hearing loss. *ASHA* 1989;31:47-50.
10. Light KJ, Looi V. Reactions to the diagnosis of a progressive hearing loss in adults. *J Acad Rehab Audiol* 2011;84:53-84.
11. Meyer C, Hickson L, Khan A, *et al*. Investigations of the actions taken by adults who failed a telephone-based hearing screen. *Ear Hear* 2011;32(6):720-731.

- 1  
2  
3 12. Brookes DN. The effect of attitude on benefit obtained from hearing aids. *Brit J*  
4  
5 *Audiol* 1989;23:3-11.  
6
- 7  
8 13. Jerram JCK, Purdy SC. Technology, expectations, and adjustment to of hearing loss:  
9  
10 Predictors of hearing aid outcome. *J Am Acad Audiol* 2001;12:64-79.  
11
- 12  
13 14. Hallberg L, Carlsson S. A qualitative study of strategies for managing a hearing  
14  
15 impairment. *Brit J Audiol* 1991;25:201-211.  
16
- 17  
18 15. Andersson G, Melin L, Lindberg P, *et al.* Development of a short scale for self-  
19  
20 assessment of experiences of hearing impairment: The Hearing Coping  
21  
22 Assessment. *Scand Audiol* 1995;24:147-154.  
23
- 24  
25 16. Andersson G, Melin L, Lindberg P, *et al.* Elderly hearing impaired persons' coping  
26  
27 behavior. *Int J Behav Med* 1996;3:303-320.  
28
- 29  
30 17. Knudsen LV, Oberg M, Nielsen C, *et al.* Factor influencing help seeking, hearing aid  
31  
32 uptake, hearing aid use and satisfaction with hearing aids: A review of the literature.  
33  
34 *Trends Amplif* 2010;14(3):127-154.  
35
- 36  
37 18. Hayes SC, Strosahl KD, Wilson KG. *Acceptance and commitment therapy an*  
38  
39 *experiential approach to behavior change*. New York: The Guilford Press, 1999.  
40
- 41  
42 19. Wentzel KR, Caldwell, K. Friendships, peer acceptance, and group membership:  
43  
44 relations to academic achievement in middle school. *Child Dev* 1997;68(6):1198–209.  
45
- 46  
47 20. Li L, Moore D. Acceptance of disability and its correlates. *J Soc Psychol*  
48  
49 1998;138:13–25.  
50
- 51  
52 21. Stuijbergen A, Becker H, Blozis S, *et al.* Conceptualization and development of the  
53  
54 chronic health conditions scale. *Issues Ment Health Nurs* 2008;29(2):101-114.  
55
- 56  
57 22. Andersson G, Willebrand M. What is coping? A critical review of the construct and  
58  
59 its application in audiology. *Int J Audiol* 2003;42:S97-S103.  
60

- 1  
2  
3 23. Karekla M, Panayiotou G. Coping and experiential avoidance: Unique or overlapping  
4 constructs?. *J Behav Ther Exp Psy* 2011;42:163-170.  
5  
6  
7 24. Goffman E. *Stigma: Notes on management of spoiled identity*. Englewood Cliffs, NJ:  
8 Prentice Hall, 1963.  
9  
10  
11 25. Héту R. The stigma attached to hearing impairment. *Scand Audiol*  
12 1996;25(Suppl.43):12-24.  
13  
14  
15 26. Danermark B, Gellerstedt LC. Hearing Impairment, Psychosocial Work Environment  
16 and Health. *Int J Audiol* 2004;43:383-389.  
17  
18  
19  
20 27. Linkowski DC. A scale to measure acceptance of disability. *Rehab Couns Bull*  
21 1971;14:236-244.  
22  
23  
24 28. McCracken LM, Vowles KE, Eccleston C. Acceptance of chronic pain: component  
25 analysis and revised assessment method. *Pain* 2004;107:159-166.  
26  
27  
28 29. McCracken LM, Vowles KE. Acceptance of chronic pain. *Curr Pain Headache Rep*  
29 2006;10(2):90-94.  
30  
31  
32  
33 30. Westin V, Hayes SC, Andersson G. Is it the sound or your relationship to it? The role  
34 of acceptance in predicting tinnitus impact. *Behav Res Ther* 2008;46:1259-1265.  
35  
36  
37 31. Demorset ME, Erdman SA. Development of the communication profile for the  
38 hearing impaired. *J Speech Lang Hear Res* 1987;52:129-143.  
39  
40  
41  
42 32. Gomez RG, Mandey SF. Coping-with-hearing-loss model for older adults. *Journal*  
43 *of Gerontology: Psychological Sciences* 2001;56B:223-225.  
44  
45  
46 33. Manchaiah VKC, Stephens D, Andersson G, *et al*. Use of the 'patient journey' model  
47 in the internet-based pre-fitting counseling of a person with hearing disability: Study  
48 protocol for a randomized controlled trial. *Trials* 2013;14(1):25.  
49  
50  
51  
52  
53  
54  
55  
56  
57  
58  
59  
60

- 1  
2  
3 34. Manchaiah VKC, Rönnerberg J, Andersson G, *et al.* Use of the ‘patient journey’ model  
4  
5 in the internet-based pre-fitting counseling of a person with hearing disability:  
6  
7 Lessons from a failed clinical trial. Submitted.  
8  
9  
10 35. Hayes SC, Strosahl KD, Wilson KG, *et al.* Measuring experiential avoidance: A  
11  
12 preliminary test of a working model. *Psychol Rec* 2004;54:553-578.  
13  
14 36. Noble W, Tyler R, Dunn C, *et al.* Hearing handicap ratings among different profiles  
15  
16 of adult cochlear implant users. *Ear Hear* 2008;29(1):112–120.  
17  
18 37. Herrmann C. International experience with the hospital anxiety and depression scale -  
19  
20 a review of validation data and clinical results. *J Psychosom Res* 1997;42(1):17–41.  
21  
22 38. Zigmond AS, Snaith RP. The hospital anxiety and depression scale. *Acta Psychiatr*  
23  
24 *Scand* 1983;67(6):361-370.  
25  
26 39. Andersson G, Kaldo-Sandström V, Ström L, *et al.* Internet administration of the  
27  
28 Hospital Anxiety and Depression Scale (HADS) in a sample of tinnitus patients. *J*  
29  
30 *Psychosom Res* 2003;55:259-262.  
31  
32 40. McConaughy EN, Prochaska JO, Velicer WF. Stages of change in psychotherapy:  
33  
34 measurement and sample profiles. *Psychother Theor Res Prac* 1983;20:368–375.  
35  
36 41. DiClemente CC, Prochaska J. Toward a comprehensive, transtheoretical model of  
37  
38 change. Miller & Heather (eds.) *Treating Addictive Behaviors: Second Edition*. New  
39  
40 York: Plenum Press, 1989, pp. 3–24.  
41  
42 42. Laplante-Lévesque A, Hickson L, Worrall L. Stages of change in adults with acquired  
43  
44 hearing impairment seeking help for the first time: application of the transtheoretical  
45  
46 model in audiologic rehabilitation. *Ear Hear* 2013;34(4):447-457.  
47  
48 43. Kline P. *An easy guide to factor analysis*. London: Routledge, 1994.  
49  
50  
51  
52  
53  
54  
55  
56  
57  
58  
59  
60

- 1  
2  
3 44. Garson GD. Reliability analysis statnotes: Topics in multivariate analysis.  
4  
5 <http://faculty.chass.ncsu.edu/garson/PA765/reliability.htm> (accessed 17 December  
6  
7 2012).  
8  
9  
10 45. Kaiser HF. The applications of electronic computers to factor analysis. *Edu Psychol*  
11  
12 *Meas* 1960;20:141-151.  
13  
14 46. Cattell RB. The scree test for the number of factors. *Multivar Behav Res* 1966;1:245-  
15  
16 276.  
17  
18 47. Costello AB, Osborne JW. Best practice in exploratory factor analysis: Four  
19  
20 recommendations for getting the most from your analysis. *Practical assessment,*  
21  
22 *Research & Evaluation* 2005;10(7):1-9. Available online:  
23  
24 <http://pareonline.net/pdf/v10n7.pdf>  
25  
26  
27 48. Westin VZ, Schulin M, Hesser H, *et al.* Acceptance and commitment therapy versus  
28  
29 tinnitus retraining therapy in the treatment of tinnitus: a randomised controlled trial.  
30  
31 *Behav Res Ther* 2011;49(11):737-747.  
32  
33  
34 49. Hesser H, Gustafsson T, Lundén C, *et al.* A randomized controlled trial of Internet-  
35  
36 delivered cognitive behavior therapy and acceptance and commitment therapy in the  
37  
38 treatment of tinnitus. *J Consult Clin Psychol* 2012;80(4):649-61.  
39  
40  
41 50. Hayes SC, Villatte M, Levin M, *et al.* Open, aware, and active: contextual approaches  
42  
43 as an emerging trend in the behavioral and cognitive therapies. *Annu Rev Clin Psychol*  
44  
45 2011;7:141-68.  
46  
47 51. Bond FW, Bunce D. The role of acceptance and job control in mental health, job  
48  
49 satisfaction, and work performance. *J Appl Psychol* 2003;88:1057-1067.  
50  
51  
52 52. Hayes SC, Stroschal K, Wilson KG, *et al.* Measuring experiential avoidance: a  
53  
54 preliminary test of a working model. *Psychol Rec* 2004;54:553-578.  
55  
56  
57  
58  
59  
60

- 1  
2  
3 53. Bond FW, Lloyd J, Guenole N. The work-related acceptance and action questionnaire  
4  
5 (WAAQ): Initial psychometric findings and their implications for measuring  
6  
7 psychological flexibility in specific contexts. *J Occup Organ Psychol* 2012;1-25.  
8  
9  
10 54. Hayes SC, Strosahl KD, Wilson KG. *Acceptance and commitment therapy: The*  
11  
12 *process and practice of mindful change (2nd ed.)*. New York: Guilford Press, 2012.  
13  
14 55. McCracken LM. Learning to live with the pain: acceptance of pain predicts  
15  
16 adjustment in persons with chronic pain. *Pain* 1998;74:21-27.  
17  
18 56. Ruiz FJ. A Review of Acceptance and Commitment Therapy (ACT) Empirical  
19  
20 Evidence: Correlational, Experimental Psychopathology, Component and Outcome  
21  
22 Studies. *Int J Psych Psychol Ther* 2010;10(1):125-162.  
23  
24 57. Swan IRC, Gatehouse S. Factors influencing consultation for management of hearing  
25  
26 disability. *Brit J Audiol* 1990;24:155-160.  
27  
28 58. Whitehead LC. Methodological and ethical issues in internet-mediated research in the  
29  
30 field of health: an integrated review of the literature. *Soc Sci Med* 2007;65:782-791.  
31  
32 59. Glasgow RE, Nelson CC, Kearney KA. Reach, engagement, and retention in an  
33  
34 internet-based weight loss program in a multi-site randomized controlled trial. *J Med*  
35  
36 *Internet Res* 2007;9:e11, doi:10.2196/jmir.9.2.e11.  
37  
38 60. Thorén E, Andersson G, Lunner T. The use of research questionnaires in hearing  
39  
40 impaired adults: Online vs paper-and-pencil administration. *BMC Ear Nose Throat*  
41  
42 *Disord* 2012;12(1):1-12.  
43  
44 61. Buchanan T. Online assessment: Desirable or dangerous?. *Prof Psychol-Res Pr*  
45  
46 2002;33:148-154.  
47  
48  
49  
50  
51  
52  
53  
54  
55  
56  
57  
58  
59  
60



## Tables

**Table 1. Participants demographics**

|                                                                                                       |             |
|-------------------------------------------------------------------------------------------------------|-------------|
| <b>Age in years (M±SD)</b>                                                                            | 63.41±10.49 |
| <b>Gender (% male)</b>                                                                                | 50          |
| <b>Duration of hearing difficulties in years (M±SD)</b>                                               | 11.67±10.83 |
| <b>Consulted a healthcare professional specialising in hearing regarding hearing difficulties (%)</b> |             |
| ▪ Yes                                                                                                 | 65.6        |
| ▪ No                                                                                                  | 34.4        |
| <b>Education (%)</b>                                                                                  |             |
| ▪ Compulsory education                                                                                | 13.3        |
| ▪ Secondary education                                                                                 | 48.9        |
| ▪ Tertiary education                                                                                  | 37.8        |
| <b>Self-reported hearing disability acceptance (HDAQ; M±SD)</b>                                       | 36.88±7.85  |
| ▪ Activity engagement                                                                                 | 22.72±4.36  |
| ▪ Avoidance and suppression                                                                           | 14.16±4.65  |
| <b>Self-reported hearing disability (HHQ; M±SD)</b>                                                   | 34.96±9.95  |
| ▪ Emotional                                                                                           | 20.61±5.75  |
| ▪ Social                                                                                              | 14.32±4.85  |
| <b>Self-reported anxiety and depression (HADS; M±SD)</b>                                              | 14.77±7.50  |
| ▪ Anxiety                                                                                             | 7.04±4.43   |
| ▪ Depression                                                                                          | 7.70±3.81   |
| <b>Stages of change (URICA)</b>                                                                       |             |
| Readiness-to-change composite (M±SD)                                                                  | 39.41±8.63  |

Table 2. HDAQ principle components analysis (n=90)

| Scale:<br>7-item HDAQ                                                                        | Factor 1:<br>Activity<br>engagement | Factor 2:<br>Avoidance and<br>suppression |
|----------------------------------------------------------------------------------------------|-------------------------------------|-------------------------------------------|
| 1. I am leading a full life, even though I have a hearing problem                            | 0.854                               |                                           |
| 2. My life is going well, even though I have a hearing problem                               | 0.891                               |                                           |
| 3. Despite hearing problem, I can draw up and stick to a certain course in my life           | 0.857                               |                                           |
| 4. When my hearing problem increases, I can still take care of my responsibilities           | 0.763                               |                                           |
| 5. My hearing problem leads me to avoid certain situations                                   |                                     | 0.885                                     |
| 6. My hearing problem changes me as a person                                                 |                                     | 0.862                                     |
| 7. I spend a lot of time thinking about how things would be for me without a hearing problem |                                     | 0.734                                     |
| <b>Cronbach's <math>\alpha</math></b>                                                        | 0.90                                | 0.82                                      |
| <b>Percentage of variance</b>                                                                | 42.94                               | 32.75                                     |
| <b>Eigenvalue</b>                                                                            | 3.0                                 | 2.29                                      |

Table 3. Split-sample validation for the seven-item HDAQ

|                                         | Full sample<br>(n=90) | Split sample 1<br>(n=45) | Split sample 2<br>(n=45) |
|-----------------------------------------|-----------------------|--------------------------|--------------------------|
| <b>Percentage of variance explained</b> |                       |                          |                          |
| ▪ Factor 1: Activity engagement         | 42.94                 | 43.48                    | 44.13                    |
| ▪ Factor 2: Avoidance and suppression   | 32.75                 | 32.93                    | 31.80                    |
| ▪ Combined                              | 75.69                 | 76.41                    | 75.93                    |
| <b>Eigenvalue</b>                       |                       |                          |                          |
| ▪ Factor 1: Activity engagement         | 3.0                   | 3.0                      | 3.0                      |
| ▪ Factor 2: Avoidance and suppression   | 2.29                  | 2.3                      | 2.2                      |
| <b>Cronbach's <math>\alpha</math></b>   |                       |                          |                          |
| ▪ Factor 1: Activity engagement         | 0.90                  | 0.83                     | 0.82                     |
| ▪ Factor 2: Avoidance and suppression   | 0.82                  | 0.89                     | 0.90                     |
| ▪ Combined                              | 0.86                  | 0.88                     | 0.86                     |

**Table 4. Correlations between different scales (\* = p<0.01)**

|                                                           | HDAQ   | HDAQ<br>- 1 | HDAQ<br>- 2 | HHQ   | HADS | URICA-R |
|-----------------------------------------------------------|--------|-------------|-------------|-------|------|---------|
| <b>Self-reported hearing disability acceptance (HDAQ)</b> | 1.00   |             |             |       |      |         |
| <b>HDAQ Factor 1: Activity engagement</b>                 | 0.86*  | 1.00        |             |       |      |         |
| <b>HDAQ Factor 2: Avoidance and suppression</b>           | 0.88*  | 0.51*       | 1.00        |       |      |         |
| <b>Self-reported hearing disability (HHQ)</b>             | -0.70* | -0.50*      | -0.71*      | 1.00  |      |         |
| <b>Self-reported anxiety and depression (HADS)</b>        | -0.58* | -0.62*      | -0.39*      | 0.36* | 1.00 |         |
| <b>Readiness to change (URICA-R)</b>                      | -0.27* | -0.26*      | -0.29*      | 0.20  | 0.18 | 1.00    |

## Appendices

### Appendix 1. Hearing Disability Acceptance Questionnaire (HDAQ)

#### *Directions*

You will find numerous statements below. Please rate the truth of each statement as it applies to you. Use the following rating scale to make your choices:

| 1          | 2                | 3           | 4              | 5          | 6                  | 7           |
|------------|------------------|-------------|----------------|------------|--------------------|-------------|
| Never true | Very rarely true | Seldom true | Sometimes true | Often true | Almost always true | Always true |

For instance, if you believe that a statement is “Often true”, then you should circle “5” on the row following the statement.

#### *Items*

1. I am leading a full life, even though I have a hearing problem
2. My life is going well, even though I have a hearing problem
3. Despite hearing problem, I can draw up and stick to a certain course in my life
4. When my hearing problem increases, I can still take care of my responsibilities
5. My hearing problem leads me to avoid certain situations
6. My hearing problem changes me as a person
7. I spend a lot of time thinking about how things would be for me without a hearing problem

### *Scoring*

Reverse score items 5, 6, and 7.

### **Appendix 2. Removed items**

- My hearing problem has led me to decrease my engagement in former activities
- It is necessary for me to control my negative thoughts and feelings concerning my hearing problem
- I will be in better control of my life if I can control my negative thoughts about my hearing problem
- I have to struggle to get things done when I have a hearing problem
- I strive to suppress aversive thoughts and feelings related to my hearing problem

STROBE 2007 (v4) Statement—Checklist of items that should be included in reports of *cross-sectional studies*

| Section/Topic                | Item # | Recommendation                                                                                                                                                                       | Reported on page # |
|------------------------------|--------|--------------------------------------------------------------------------------------------------------------------------------------------------------------------------------------|--------------------|
| Title and abstract           | 1      | (a) Indicate the study’s design with a commonly used term in the title or the abstract                                                                                               | 1                  |
|                              |        | (b) Provide in the abstract an informative and balanced summary of what was done and what was found                                                                                  | 2 & 3              |
| <b>Introduction</b>          |        |                                                                                                                                                                                      |                    |
| Background/rationale         | 2      | Explain the scientific background and rationale for the investigation being reported                                                                                                 | 4 – 6              |
| Objectives                   | 3      | State specific objectives, including any prespecified hypotheses                                                                                                                     | 6                  |
| <b>Methods</b>               |        |                                                                                                                                                                                      |                    |
| Study design                 | 4      | Present key elements of study design early in the paper                                                                                                                              | 7                  |
| Setting                      | 5      | Describe the setting, locations, and relevant dates, including periods of recruitment, exposure, follow-up, and data collection                                                      | 7                  |
| Participants                 | 6      | (a) Give the eligibility criteria, and the sources and methods of selection of participants                                                                                          | 7                  |
| Variables                    | 7      | Clearly define all outcomes, exposures, predictors, potential confounders, and effect modifiers. Give diagnostic criteria, if applicable                                             | 7 – 9              |
| Data sources/<br>measurement | 8*     | For each variable of interest, give sources of data and details of methods of assessment (measurement). Describe comparability of assessment methods if there is more than one group | 7 - 9              |
| Bias                         | 9      | Describe any efforts to address potential sources of bias                                                                                                                            | 7, 15 & 16         |
| Study size                   | 10     | Explain how the study size was arrived at                                                                                                                                            | 7                  |
| Quantitative variables       | 11     | Explain how quantitative variables were handled in the analyses. If applicable, describe which groupings were chosen and why                                                         | 9                  |
| Statistical methods          | 12     | (a) Describe all statistical methods, including those used to control for confounding                                                                                                | 9                  |
|                              |        | (b) Describe any methods used to examine subgroups and interactions                                                                                                                  | 9                  |
|                              |        | (c) Explain how missing data were addressed                                                                                                                                          | NA                 |
|                              |        | (d) If applicable, describe analytical methods taking account of sampling strategy                                                                                                   | 9                  |
|                              |        | (e) Describe any sensitivity analyses                                                                                                                                                | 9                  |
| <b>Results</b>               |        |                                                                                                                                                                                      |                    |

|                          |     |                                                                                                                                                                                                              |         |
|--------------------------|-----|--------------------------------------------------------------------------------------------------------------------------------------------------------------------------------------------------------------|---------|
| Participants             | 13* | (a) Report numbers of individuals at each stage of study—eg numbers potentially eligible, examined for eligibility, confirmed eligible, included in the study, completing follow-up, and analysed            | 9       |
|                          |     | (b) Give reasons for non-participation at each stage                                                                                                                                                         | NA      |
|                          |     | (c) Consider use of a flow diagram                                                                                                                                                                           | NA      |
| Descriptive data         | 14* | (a) Give characteristics of study participants (eg demographic, clinical, social) and information on exposures and potential confounders                                                                     | 9 & 24  |
|                          |     | (b) Indicate number of participants with missing data for each variable of interest                                                                                                                          | NA      |
| Outcome data             | 15* | Report numbers of outcome events or summary measures                                                                                                                                                         | 9 - 12  |
| Main results             | 16  | (a) Give unadjusted estimates and, if applicable, confounder-adjusted estimates and their precision (eg, 95% confidence interval). Make clear which confounders were adjusted for and why they were included | 9 - 12  |
|                          |     | (b) Report category boundaries when continuous variables were categorized                                                                                                                                    | 9 - 12  |
|                          |     | (c) If relevant, consider translating estimates of relative risk into absolute risk for a meaningful time period                                                                                             | 9 - 12  |
| Other analyses           | 17  | Report other analyses done—eg analyses of subgroups and interactions, and sensitivity analyses                                                                                                               | 9 - 12  |
| <b>Discussion</b>        |     |                                                                                                                                                                                                              |         |
| Key results              | 18  | Summarise key results with reference to study objectives                                                                                                                                                     | 12 - 15 |
| Limitations              | 19  | Discuss limitations of the study, taking into account sources of potential bias or imprecision. Discuss both direction and magnitude of any potential bias                                                   | 15 & 16 |
| Interpretation           | 20  | Give a cautious overall interpretation of results considering objectives, limitations, multiplicity of analyses, results from similar studies, and other relevant evidence                                   | 15 & 16 |
| Generalisability         | 21  | Discuss the generalisability (external validity) of the study results                                                                                                                                        | 15 & 16 |
| <b>Other information</b> |     |                                                                                                                                                                                                              |         |
| Funding                  | 22  | Give the source of funding and the role of the funders for the present study and, if applicable, for the original study on which the present article is based                                                | 17      |

\*Give information separately for cases and controls in case-control studies and, if applicable, for exposed and unexposed groups in cohort and cross-sectional studies.

**Note:** An Explanation and Elaboration article discusses each checklist item and gives methodological background and published examples of transparent reporting. The STROBE checklist is best used in conjunction with this article (freely available on the Web sites of PLoS Medicine at <http://www.plosmedicine.org/>, Annals of Internal Medicine at <http://www.annals.org/>, and Epidemiology at <http://www.epidem.com/>). Information on the STROBE Initiative is available at [www.strobe-statement.org](http://www.strobe-statement.org).



## Appendices

### Appendix 1. Hearing Disability Acceptance Questionnaire (HDAQ)

#### *Directions*

You will find numerous statements below. Please rate the truth of each statement as it applies to you. Use the following rating scale to make your choices:

| 1          | 2                | 3           | 4              | 5          | 6                  | 7           |
|------------|------------------|-------------|----------------|------------|--------------------|-------------|
| Never true | Very rarely true | Seldom true | Sometimes true | Often true | Almost always true | Always true |

For instance, if you believe that a statement is “Often true”, then you should circle “5” on the row following the statement.

#### *Items*

1. I am leading a full life, even though I have a hearing problem
2. My life is going well, even though I have a hearing problem
3. Despite hearing problem, I can draw up and stick to a certain course in my life
4. When my hearing problem increases, I can still take care of my responsibilities
5. My hearing problem leads me to avoid certain situations
6. My hearing problem changes me as a person
7. I spend a lot of time thinking about how things would be for me without a hearing problem

1  
2  
3  
4  
5  
6 **Scoring**  
7

8 Reverse score items 5, 6, and 7.  
9  
10

11  
12 **Appendix 2. Removed items**  
13

- 14
- 15     ▪ My hearing problem has led me to decrease my engagement in former activities
  - 16
  - 17     ▪ It is necessary for me to control my negative thoughts and feelings concerning my
  - 18         hearing problem
  - 19
  - 20     ▪ I will be in better control of my life if I can control my negative thoughts about my
  - 21         hearing problem
  - 22
  - 23     ▪ I have to struggle to get things done when I have a hearing problem
  - 24
  - 25     ▪ I strive to suppress aversive thoughts and feelings related to my hearing problem
  - 26
  - 27
  - 28
  - 29
  - 30
  - 31
  - 32
  - 33
  - 34
  - 35
  - 36
  - 37
  - 38
  - 39
  - 40
  - 41
  - 42
  - 43
  - 44
  - 45
  - 46
  - 47
  - 48
  - 49
  - 50
  - 51
  - 52
  - 53
  - 54
  - 55
  - 56
  - 57
  - 58
  - 59
  - 60
